# Supplementary material for: Ergothioneine and related histidine derivatives in the gas phase: tautomer structures determined by IRMPD spectroscopy and theory
Source: Royal Society of Chemistry journal article supplement (doi:10.1039/c7cp03843g), 2017-01-01
Supplement: c7cp03843g1.pdf [file c7cp03843g1.pdf]

## Ergothioneine and related Histidine Derivatives in the Gas Phase: Tautomer Structures determined by IRMPD-Spectroscopy and Theory Supplementary Information

Katrin Peckelsen,<sup>1</sup> Jonathan Martens,<sup>2</sup> Lisa Czypiel,<sup>1</sup> Jos Oomens,<sup>2,3</sup> Giel Berden,<sup>2</sup> Dirk Gründemann,<sup>4</sup> Mathias Schäfer,<sup>1,\*</sup> and Anthony J. H. M. Meijer<sup>5,†</sup>

<sup>1</sup>*Department of Chemistry, Institute of Organic Chemistry,  
University of Cologne, Greinstraße 4, 50939 Cologne, Germany*

<sup>2</sup>*Radboud University, Institute for Molecules and Materials,  
FELIX Laboratory, Toernooiveld 7c, 6525 ED Nijmegen, The Netherlands*

<sup>3</sup>*van 't Hoff Institute for Molecular Sciences, University of Amsterdam,  
Science Park 904, 1098 XH Amsterdam, The Netherlands*

<sup>4</sup>*Department of Pharmacology, University of Cologne, Gleuelerstraße 24, 50931 Cologne, Germany*

<sup>5</sup>*Department of Chemistry, University of Sheffield, Sheffield S3 7HF, UK*

(Dated: August 1, 2017)

---

\* [mathias.schaefer@uni-koeln.de](mailto:mathias.schaefer@uni-koeln.de)

† [a.meijer@sheffield.ac.uk](mailto:a.meijer@sheffield.ac.uk)

## CONTENTS

|                                                                                                |    |
|------------------------------------------------------------------------------------------------|----|
| S1. Additional Figures                                                                         | 6  |
| S2. Additional Tables                                                                          | 10 |
| S3. Computational Summary                                                                      | 18 |
| S4. Ergothionine (1+H) <sub>S</sub> (thione; isomer <b>a</b> )                                 | 19 |
| S4.1. Cartesian Co-ordinates (XYZ format)                                                      | 19 |
| S4.2. Frequencies                                                                              | 20 |
| S5. Ergothionine (1N $\epsilon$ +H) <sub>SH</sub> (thiol; isomer <b>b</b> )                    | 22 |
| S5.1. Cartesian Co-ordinates (XYZ format)                                                      | 22 |
| S5.2. Frequencies                                                                              | 23 |
| S6. Ergothionine (1N $\epsilon$ +H) <sub>SH</sub> (thiol; isomer <b>c</b> )                    | 25 |
| S6.1. Cartesian Co-ordinates (XYZ format)                                                      | 25 |
| S6.2. Frequencies                                                                              | 26 |
| S7. Ergothionine (1N $\epsilon$ +H) <sub>SH</sub> (thiol; isomer <b>c2</b> )                   | 28 |
| S7.1. Cartesian Co-ordinates (XYZ format)                                                      | 28 |
| S7.2. Frequencies                                                                              | 29 |
| S8. Ergothionine (1+H) <sub>S</sub> (thione; isomer <b>a2</b> )                                | 31 |
| S8.1. Cartesian Co-ordinates (XYZ format)                                                      | 31 |
| S8.2. Frequencies                                                                              | 32 |
| S9. Ergothionine (1+H) <sub>S</sub> (thione; isomer <b>a</b> ; $\omega$ -B97X-D)               | 34 |
| S9.1. Cartesian Co-ordinates (XYZ format)                                                      | 34 |
| S9.2. Frequencies                                                                              | 36 |
| S10. Ergothionine (1N $\epsilon$ +H) <sub>SH</sub> (thiol; isomer <b>b</b> ; $\omega$ -B97X-D) | 38 |
| S10.1. Cartesian Co-ordinates (XYZ format)                                                     | 38 |
| S10.2. Frequencies                                                                             | 40 |
| S11. Ergothionine (1N $\epsilon$ +H) <sub>SH</sub> (thiol; isomer <b>c</b> ; $\omega$ -B97X-D) | 42 |
| S11.1. Cartesian Co-ordinates (XYZ format)                                                     | 42 |
| S11.2. Frequencies                                                                             | 44 |
| S12. Ergothionine (1+H) <sub>S</sub> (thione; isomer <b>a</b> ) in MeOH                        | 46 |
| S12.1. Cartesian Co-ordinates (XYZ format)                                                     | 46 |
| S12.2. Frequencies                                                                             | 47 |
| S13. Ergothionine (1N $\epsilon$ +H) <sub>SH</sub> (thiol; isomer <b>b</b> ) in MeOH           | 49 |
| S13.1. Cartesian Co-ordinates (XYZ format)                                                     | 49 |
| S13.2. Frequencies                                                                             | 50 |
| S14. Ergothionine (1N $\epsilon$ +H) <sub>SH</sub> (thiol; isomer <b>c</b> ) in MeOH           | 52 |
| S14.1. Cartesian Co-ordinates (XYZ format)                                                     | 52 |
| S14.2. Frequencies                                                                             | 53 |

|                                                                                                                                                                                                 |    |
|-------------------------------------------------------------------------------------------------------------------------------------------------------------------------------------------------|----|
| S15. Ergothionine (1+H) <sub>S</sub> (thione; isomer <b>a2</b> ) in MeOH                                                                                                                        | 55 |
| S15.1. Cartesian Co-ordinates (XYZ format)                                                                                                                                                      | 55 |
| S15.2. Frequencies                                                                                                                                                                              | 56 |
| S16. Ergothionine (1N $\epsilon$ +H) <sub>SH</sub> (thiol; zwitterion) in MeOH                                                                                                                  | 58 |
| S16.1. Cartesian Co-ordinates (XYZ format)                                                                                                                                                      | 58 |
| S16.2. Frequencies                                                                                                                                                                              | 60 |
| S17. Transition state between Ergothionine (1+H) <sub>S</sub> (thione; isomer <b>a2</b> ) and intermediate Ergothionine (1N $\epsilon$ +H) <sub>SH</sub> (thiol; isomer <b>c3</b> ) in MeOH     | 62 |
| S17.1. Cartesian Co-ordinates (XYZ format)                                                                                                                                                      | 62 |
| S17.2. Frequencies                                                                                                                                                                              | 63 |
| S18. Transition state between Ergothionine (1+H) <sub>S</sub> (thione; isomer <b>a2</b> ) and intermediate Ergothionine (1N $\epsilon$ +H) <sub>SH</sub> (thiol; isomer <b>c3</b> )             | 65 |
| S18.1. Cartesian Co-ordinates (XYZ format)                                                                                                                                                      | 65 |
| S18.2. Frequencies                                                                                                                                                                              | 66 |
| S19. Intermediate Ergothionine (1N $\epsilon$ +H) <sub>SH</sub> (thiol; isomer <b>c3</b> )                                                                                                      | 68 |
| S19.1. Cartesian Co-ordinates (XYZ format)                                                                                                                                                      | 68 |
| S19.2. Frequencies                                                                                                                                                                              | 69 |
| S20. Transition state between intermediate Ergothionine (1N $\epsilon$ +H) <sub>SH</sub> (thiol; isomer <b>c3</b> ) and Ergothionine (1N $\epsilon$ +H) <sub>SH</sub> (thiol; isomer <b>b</b> ) | 71 |
| S20.1. Cartesian Co-ordinates (XYZ format)                                                                                                                                                      | 71 |
| S20.2. Frequencies                                                                                                                                                                              | 72 |
| S21. Hercynine (conformer <b>a</b> )                                                                                                                                                            | 74 |
| S21.1. Cartesian Co-ordinates (XYZ format)                                                                                                                                                      | 74 |
| S21.2. Frequencies                                                                                                                                                                              | 75 |
| S22. Hercynine (conformer <b>b</b> )                                                                                                                                                            | 77 |
| S22.1. Cartesian Co-ordinates (XYZ format)                                                                                                                                                      | 77 |
| S22.2. Frequencies                                                                                                                                                                              | 78 |
| S23. Hercynine (conformer <b>c</b> )                                                                                                                                                            | 80 |
| S23.1. Cartesian Co-ordinates (XYZ format)                                                                                                                                                      | 80 |
| S23.2. Frequencies                                                                                                                                                                              | 81 |
| S24. Hercynine (conformer <b>a</b> ) in MeOH                                                                                                                                                    | 83 |
| S24.1. Cartesian Co-ordinates (XYZ format)                                                                                                                                                      | 83 |
| S24.2. Frequencies                                                                                                                                                                              | 84 |
| S25. Hercynine (conformer <b>b</b> ) in MeOH                                                                                                                                                    | 86 |
| S25.1. Cartesian Co-ordinates (XYZ format)                                                                                                                                                      | 86 |
| S25.2. Frequencies                                                                                                                                                                              | 87 |
| S26. Hercynine (conformer <b>c</b> ) in MeOH                                                                                                                                                    | 89 |
| S26.1. Cartesian Co-ordinates (XYZ format)                                                                                                                                                      | 89 |
| S26.2. Frequencies                                                                                                                                                                              | 90 |

|                                                                                       |     |
|---------------------------------------------------------------------------------------|-----|
| S27. Hercynine (conformer <b>a</b> ) + 2 MeOH in MeOH                                 | 92  |
| S27.1. Cartesian Co-ordinates (XYZ format)                                            | 92  |
| S27.2. Frequencies                                                                    | 94  |
| S28. Hercynine (conformer <b>b</b> ) + 2 MeOH in MeOH                                 | 96  |
| S28.1. Cartesian Co-ordinates (XYZ format)                                            | 96  |
| S28.2. Frequencies                                                                    | 98  |
| S29. Hercynine (conformer <b>c</b> ) + 2 MeOH in MeOH (1 <sup>st</sup> conformer)     | 100 |
| S29.1. Cartesian Co-ordinates (XYZ format)                                            | 100 |
| S29.2. Frequencies                                                                    | 102 |
| S30. Hercynine (conformer <b>c</b> ) + 2 MeOH in MeOH (2 <sup>nd</sup> conformer)     | 104 |
| S30.1. Cartesian Co-ordinates (XYZ format)                                            | 104 |
| S30.2. Frequencies                                                                    | 106 |
| S31. Methyl-Hercynine (conformer <b>a</b> )                                           | 108 |
| S31.1. Cartesian Co-ordinates (XYZ format)                                            | 108 |
| S31.2. Frequencies                                                                    | 109 |
| S32. Methyl-Hercynine (conformer <b>b</b> )                                           | 111 |
| S32.1. Cartesian Co-ordinates (XYZ format)                                            | 111 |
| S32.2. Frequencies                                                                    | 112 |
| S33. Methyl-Hercynine (conformer <b>c</b> )                                           | 114 |
| S33.1. Cartesian Co-ordinates (XYZ format)                                            | 114 |
| S33.2. Frequencies                                                                    | 115 |
| S34. Ergothionine (1N $\epsilon$ +Na) <sub>SH</sub> (thiol; isomer <b>a</b> )         | 117 |
| S34.1. Cartesian Co-ordinates (XYZ format)                                            | 117 |
| S34.2. Frequencies                                                                    | 118 |
| S35. Ergothionine (1N $\epsilon$ +Na) <sub>SH</sub> (thiol; isomer <b>b</b> )         | 120 |
| S35.1. Cartesian Co-ordinates (XYZ format)                                            | 120 |
| S35.2. Frequencies                                                                    | 121 |
| S36. Ergothionine (1+Na) <sub>S</sub> (thione; isomer <b>c</b> )                      | 123 |
| S36.1. Cartesian Co-ordinates (XYZ format)                                            | 123 |
| S36.2. Frequencies                                                                    | 124 |
| S37. Ergothionine (1N $\epsilon$ +Na) <sub>SH</sub> (thiol; isomer <b>a</b> ) in MeOH | 126 |
| S37.1. Cartesian Co-ordinates (XYZ format)                                            | 126 |
| S37.2. Frequencies                                                                    | 127 |
| S38. Ergothionine (1N $\epsilon$ +Na) <sub>SH</sub> (thiol; isomer <b>b</b> ) in MeOH | 129 |
| S38.1. Cartesian Co-ordinates (XYZ format)                                            | 129 |
| S38.2. Frequencies                                                                    | 130 |
| S39. Ergothionine (1 + Na) <sub>S</sub> (thione; isomer <b>c</b> ) in MeOH            | 132 |
| S39.1. Cartesian Co-ordinates (XYZ format)                                            | 132 |

|                                                   |     |
|---------------------------------------------------|-----|
| S39.2. Frequencies                                | 133 |
| S40. Hercynine (2 + Na) (isomer <b>a</b> )        | 135 |
| S40.1. Cartesian Co-ordinates (XYZ format)        | 135 |
| S40.2. Frequencies                                | 136 |
| S41. Hercynine (2 + Na) (isomer <b>b</b> )        | 138 |
| S41.1. Cartesian Co-ordinates (XYZ format)        | 138 |
| S41.2. Frequencies                                | 139 |
| S42. Hercynine (2 + Na) (isomer <b>c</b> )        | 141 |
| S42.1. Cartesian Co-ordinates (XYZ format)        | 141 |
| S42.2. Frequencies                                | 142 |
| S43. Methyl-hercynine (3 + Na) (isomer <b>a</b> ) | 144 |
| S43.1. Cartesian Co-ordinates (XYZ format)        | 144 |
| S43.2. Frequencies                                | 145 |
| S44. Methyl-hercynine (3 + Na) (isomer <b>b</b> ) | 147 |
| S44.1. Cartesian Co-ordinates (XYZ format)        | 147 |
| S44.2. Frequencies                                | 148 |
| S45. Methyl-hercynine (3 + Na) (isomer <b>c</b> ) | 150 |
| S45.1. Cartesian Co-ordinates (XYZ format)        | 150 |
| S45.2. Frequencies                                | 151 |

## S1. ADDITIONAL FIGURES

## Additional Figures:

Figure S1. (+)ESI-MS of Ergothioneine, MeOH

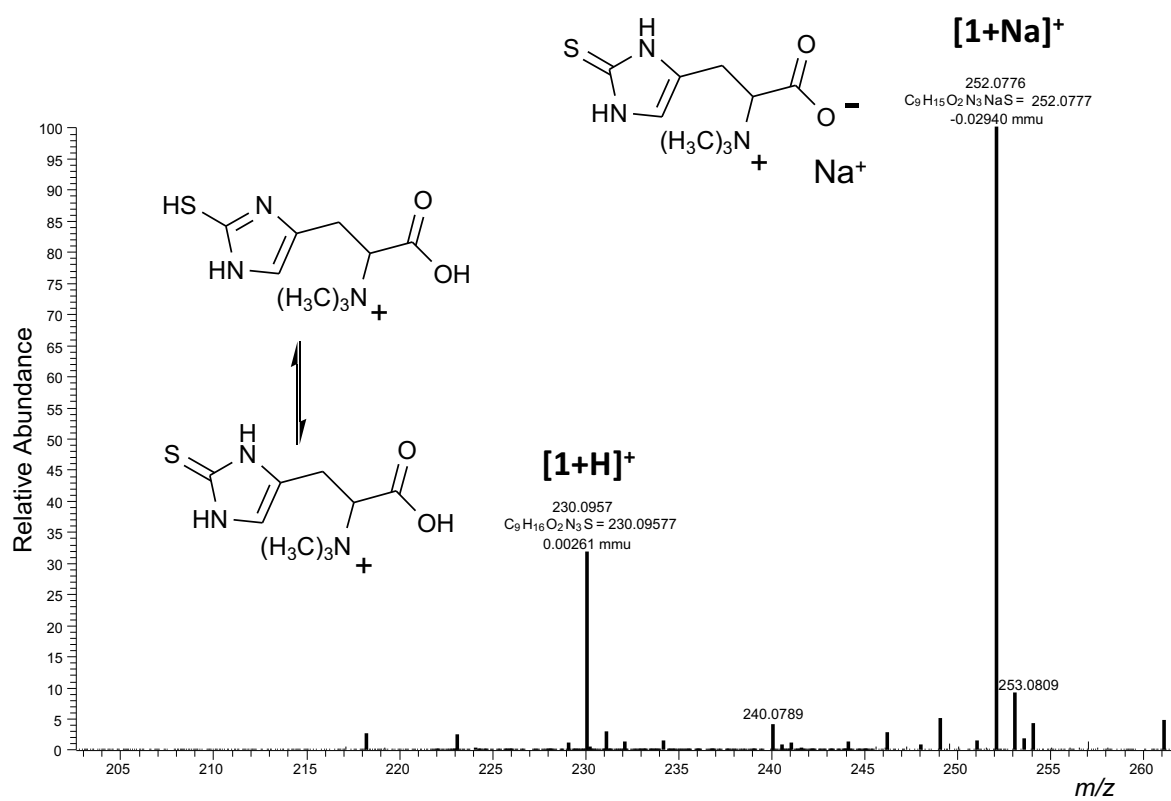

**Figure S2.** (+)ESI-MS<sup>2</sup> of Ergothioneine [1+H]<sup>+</sup> *m/z* 230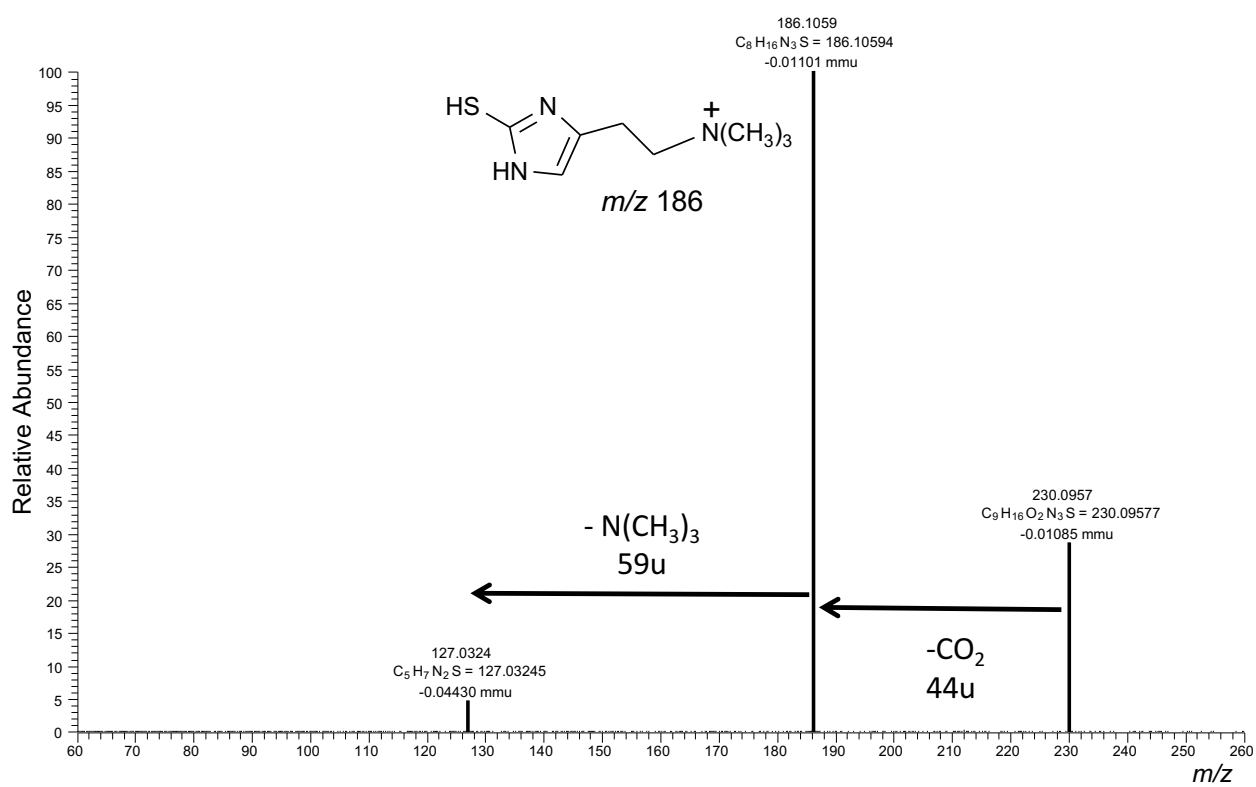

**Figure S3.** (+)ESI-MS<sup>3</sup> of Ergothioneine [1+H]<sup>+</sup>  
 $m/z$  230  $\rightarrow$   $m/z$  186  $\rightarrow$

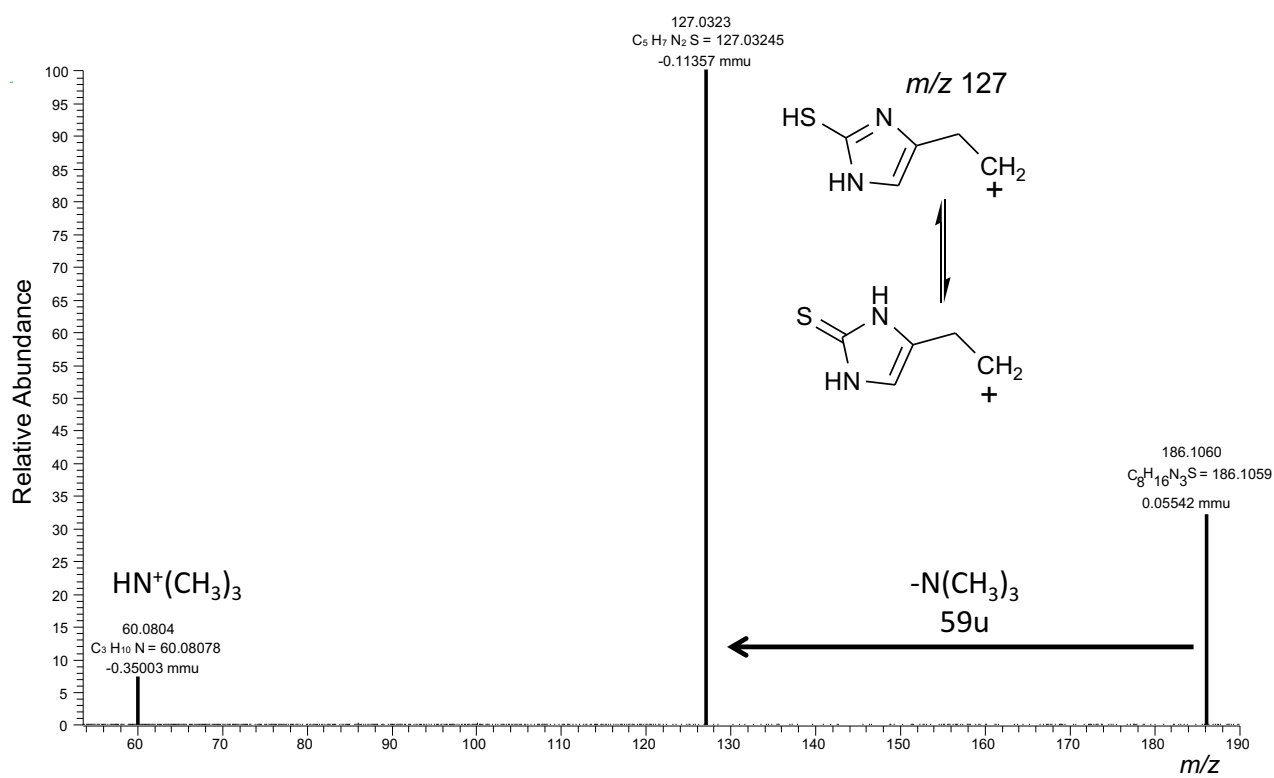



**Figure S4.** (+)ESI-MS<sup>3</sup> of Ergothioneine [**1+H**]<sup>+</sup>  $m/z$  230  $\rightarrow$   $m/z$  186  $\rightarrow$

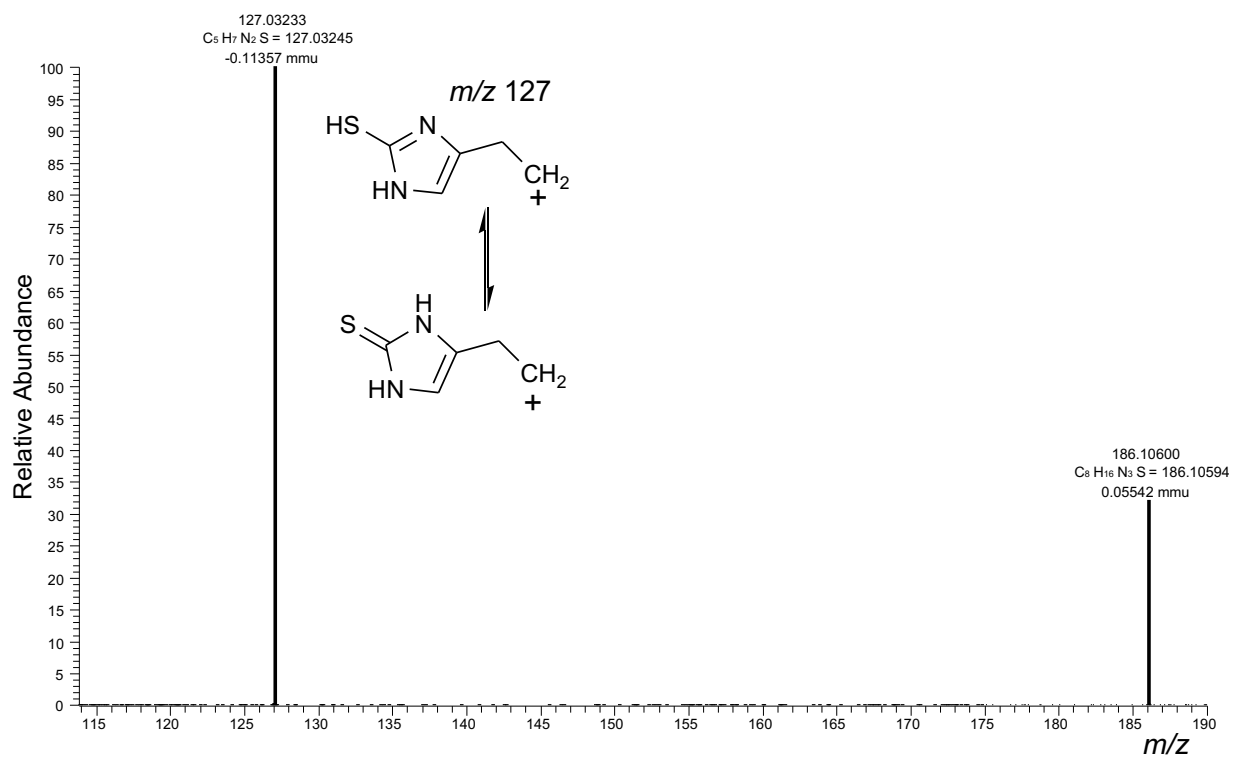

## S2. ADDITIONAL TABLES

**Table S1:** IRMPD spectrum of the protonated molecular ion of ergothioneine and the band origins of the computed ET ions

| Vibrational Mode                              | Experiment | Theory                 |                                        |                                        |                                         |                         |
|-----------------------------------------------|------------|------------------------|----------------------------------------|----------------------------------------|-----------------------------------------|-------------------------|
|                                               |            | (1+H) <sub>s</sub> (a) | (1N <sub>ε</sub> +H) <sub>SH</sub> (b) | (1N <sub>ε</sub> +H) <sub>SH</sub> (c) | (1N <sub>ε</sub> +H) <sub>SH</sub> (c2) | (1+H) <sub>s</sub> (a2) |
| O-H Stretching                                | 3551       | 3518                   |                                        | 3530                                   | 3535                                    | 3535                    |
| N-H Stretching                                | 3487       | 3467                   | 3458                                   | 3458                                   | 3458                                    | 3501                    |
| C=O Stretching                                | 1775       | 1767                   | 1759                                   | 1767                                   | 1767                                    | 1759                    |
| C=C Stretching                                | 1559       |                        | 1567                                   | 1558                                   | 1559                                    |                         |
| C=S Stretching                                | 1468       | 1462/1139              |                                        |                                        |                                         | 1471                    |
| N-H Bending in plane Imidazole                | 1468       |                        |                                        | 1471                                   | 1468                                    | 1471/1139               |
| Betaine Wagging                               | 1402       |                        | 1235                                   | 1401                                   |                                         | 1401                    |
| C-H Bending in plane                          |            | 1382/1322              |                                        |                                        |                                         | 1261                    |
| CH <sub>2</sub> Wagging                       |            |                        | 1271                                   | 1340                                   | 1319                                    |                         |
| O-H Bending in plane                          | 1468       | 1322/1217/1139         | 1479                                   | 1322/1130                              | 1138                                    |                         |
| N-C-N Stretching                              |            |                        | 1409                                   |                                        |                                         |                         |
| C-N=C-C Stretching                            |            |                        |                                        | 1296                                   |                                         |                         |
| Combinatoric Wagging                          | 1216       |                        |                                        | 1200                                   |                                         |                         |
| HC-NH Stretching                              | 1061/1096  | 1069                   | 1086                                   | 1078                                   | 1390                                    | 1069                    |
| CH <sub>2</sub> -CH Stretching                | 962        | 973                    |                                        |                                        |                                         |                         |
| C-N(CH <sub>3</sub> ) <sub>3</sub> Stretching | 962/837    | 938/825                | 877                                    | 973/830                                | 860                                     | 877                     |
| N-CH <sub>3</sub> Stretching                  |            | 912                    |                                        | 921                                    |                                         |                         |
| S-H Bending                                   | 871        |                        |                                        | 886                                    |                                         |                         |
| HN-C-NH                                       |            |                        |                                        |                                        |                                         | 938                     |
| HO-C=O Wagging                                | 765        |                        |                                        | 772                                    |                                         |                         |
| C-H Bending out of plane Imidazole            |            | 772                    |                                        | 746                                    | 756                                     |                         |
| HO-C=O Scissoring                             | 648        |                        |                                        | 641                                    |                                         |                         |
| O-H Bending out of plane                      | 583        | 598                    |                                        | 598                                    | 631/687                                 | 702                     |
| N-H Bending out of plane Imidazole            | 571        | 563                    | 563                                    | 545                                    | 556                                     | 562                     |

**Table S2:** IRMPD spectrum of the protonated molecular ion of hercynine  $[2+H]^+$  at  $m/z$  198 and the band origins of the computed ET ions

| Vibrational Mode                              | Experiment | Theory      |             |             |
|-----------------------------------------------|------------|-------------|-------------|-------------|
|                                               |            | (2Nε+H) (a) | (2Nε+H) (b) | (2Nε+H) (c) |
| C=O Stretching + O-H Bending                  | 1781       | 1759        | 1767        | 1759        |
| C=C Stretching                                |            | 1549        | 1549        | 1558        |
| HC=N Stretching + CH <sub>3</sub> Scissoring  | 1488       | 1479/1444   | 1479        |             |
| CH <sub>2</sub> Scissoring                    |            |             | 1444        |             |
| HC-NH Stretching                              | 1423       | 1418/1069   | 1409/1069   |             |
| HOOC-H Bending                                |            | 1322        | 1374        |             |
| O-H Bending                                   |            |             | 1305        | 1471        |
| C-H Bending in plane Imidazole                | 1229       | 1217        | 1226        |             |
| CH <sub>2</sub> Wagging                       |            | 1348        |             | 1287        |
| CH <sub>3</sub> Wagging                       |            | 1104        |             |             |
| C-OH Stretching                               | 1139       | 1139        | 1139        |             |
| Betaine Wagging                               |            |             |             | 1235        |
| CH <sub>3</sub> Torsion                       |            |             | 1113        | 1209        |
| C=N=C Stretching                              |            |             |             | 1069        |
| HC-CH <sub>2</sub> Stretching                 |            |             | 1008        |             |
| CH <sub>2</sub> Rocking                       | 980        | 886         | 973         |             |
| N-CH <sub>3</sub> Stretching                  |            | 921         | 922         |             |
| C-N(CH <sub>3</sub> ) <sub>3</sub> Stretching |            |             | 859         | 877         |
| C-H Bending out of plane Imid                 | 842        | 826         | 833         | 833         |
| O-H Bending out of plane                      |            |             | 781         | 990         |
| COOH Scissoring                               | 657        | 641         |             | 659         |
| Imidazole out of plane                        | 576        | 580         | 685         | 589         |

**Table S3:** IRMPD spectrum of the protonated molecular ion of protonated  $N_\epsilon$ -Methyl-hercynine  $[3+H]^+$  at  $m/z$  212 and the band origins of the computed ET ions

| Vibrational Mode                                                    | Experiment | Theory      |             |             |
|---------------------------------------------------------------------|------------|-------------|-------------|-------------|
|                                                                     |            | (3Ne+H) (a) | (3Ne+H) (b) | (3Ne+H) (c) |
| C=O Stretching + O-H Bending                                        | 1782       | 1759        | 1767        | 1758        |
| C=C Stretching                                                      | 1521       |             | 1549        | 1556        |
| N=C Stretching + CH3 Wagging Imidazole                              | 1487       | 1488        | 1488        | 1502        |
| CH <sub>3</sub> Scissoring                                          |            | 1444        |             | 1478        |
| HC-COO                                                              | 1418       | 1418/886    |             |             |
| CH <sub>2</sub> Wagging                                             |            | 1357        |             | 1300        |
| Betaine Wagging                                                     |            | 536         | 1444        | 1214        |
| CH <sub>3</sub> Wagging Imidazole                                   |            |             | 1418        |             |
| HOOC-H Bending in                                                   |            | 1322        | 1374        |             |
| O-H Bending in plane                                                |            | 1278        | 1305        | 1020/1005   |
| H Imidazole in plane                                                | 1230       | 1217        |             |             |
| C-OH Stretching                                                     |            | 1139        |             |             |
| CH <sub>3</sub> Torsion Imidazole + H <sub>3</sub> CN=CH Stretching | 1046       | 1051        |             |             |
| CH <sub>2</sub> Rocking                                             |            | 982         |             |             |
| C-N(CH <sub>3</sub> ) <sub>3</sub> Stretching                       |            | 921         | 1261        | 881         |
| (N=)C-H Bending in plane                                            | 1230       |             | 1235        | 826         |
| O-H Bending in plane                                                | 1141       |             | 1139        |             |
| CH <sub>2</sub> -CH Stretching                                      |            |             | 1008        |             |
| Imidazole Torsion                                                   | 991        |             | 982         |             |
| N-CH <sub>3</sub> Stretching Betaine                                | 952        |             | 955         |             |
| Betaine Motion                                                      |            |             | 929         |             |
| C-N(CH <sub>3</sub> ) <sub>3</sub> Stretching                       |            |             | 859         |             |
| (N=)C-H Bending out of plane                                        | 832        |             | 825         |             |
| Combinatoric                                                        |            |             | 781         |             |
| (C=)C-H Bending out of plane                                        |            |             | 763         |             |
| (C-)C-H Bending in plane                                            |            |             |             | 1145        |
| COOH Scissoring                                                     | 657        | 650         |             |             |
| O-H Bending out of plane                                            | 622        | 624/589     | 667/641/589 |             |
| Imidazole Bending out of plane                                      |            | 825/711     | 628         | 625         |

**Table S4:** IRMPD spectrum of the sodiated molecular ion of ergothioneine  $[1+\text{Na}]^+$  at  $m/z$  252 and the band origins of the computed ET ions

| Vibrational Mode                              | Experiment QIT | Experiment FTICR | Theory                                   |                                          |                       |
|-----------------------------------------------|----------------|------------------|------------------------------------------|------------------------------------------|-----------------------|
|                                               |                |                  | $(1\text{Ne}+\text{Na})_{\text{SH}}$ (a) | $(1\text{Ne}+\text{Na})_{\text{SH}}$ (b) | $(1+\text{Na})_5$ (c) |
| COO Asymmetric Stretching                     | 1648           | 1645             | 1698                                     | 1636                                     | 1636                  |
| C-S Stretching + N-H Bending in plane         | 1487/1470      | 1483             |                                          |                                          | 1474/1165             |
| C=C Stretching                                |                |                  | 1549                                     | 1540                                     |                       |
| CH <sub>3</sub> Scissoring                    |                |                  | 1497                                     | 1497                                     |                       |
| CH <sub>3</sub> Wagging                       | 1430           |                  | 1436                                     |                                          | 1401                  |
| N-H Bending in plane Imidazole                |                |                  |                                          | 1444                                     |                       |
| HN-C=N Asymmetric Stretching                  | 1374           | 1373             | 1392                                     | 1401                                     |                       |
| CH <sub>2</sub> Wagging + C-COO Stretching    | 1356/1343      | 1348             |                                          | 1366                                     | 1366                  |
| CH <sub>2</sub> Wagging + OOCC-H Bending      |                |                  | 1322                                     | 1331                                     |                       |
| CH <sub>2</sub> Torsion                       |                |                  | 1217                                     | 1270                                     |                       |
| C-N(CH <sub>3</sub> ) <sub>3</sub>            |                |                  |                                          |                                          | 1252                  |
| Betaine Wagging                               |                |                  |                                          | 1226                                     | 1235                  |
| OOCC-H Bending                                | 1169/1152      | 1167             |                                          | 1191                                     | 1340                  |
| HC-NH Stretching                              | 1082           |                  | 1086                                     | 1086                                     | 1069                  |
| C-N(CH <sub>3</sub> ) <sub>3</sub> Stretching | 948/813        |                  |                                          |                                          | 937/807               |
| C-H out of plane Bending Imidazole            | 765            |                  |                                          |                                          | 772                   |

**Table S5:** IRMPD spectrum of the sodiated molecular ion of hercynine  $[2+\text{Na}]^+$   $m/z$  220 and the band origins of the computed ET ions

| Vibrational Mode                                                             | Experiment | Theory       |                |              |
|------------------------------------------------------------------------------|------------|--------------|----------------|--------------|
|                                                                              |            | (2Ne+Na) (a) | (2Ne+Na) (b)   | (2Ne+Na) (c) |
| COO Asymmetric Stretching                                                    | 1644       | 1698         | 1593           | 1636         |
| C=C Stretching                                                               | 1570       | 1558         | 1545           | 1549         |
| CH <sub>3</sub> Scissoring                                                   | 1487/1428  | 1488/1427    | 1497           | 1488         |
| CH <sub>3</sub> Torsion                                                      |            |              | 1479/1444/1113 |              |
| CH <sub>3</sub> Wagging                                                      |            | 1401         | 1409           |              |
| CH <sub>2</sub> Scissoring                                                   |            |              |                | 1427         |
| HC-COO Stretching                                                            | 1383       | 1322         | 1374           | 1374         |
| OOCC-H Bending+ CH <sub>2</sub> Wagging                                      |            |              | 1348           |              |
| CH <sub>2</sub> Torsion                                                      |            | 1174/676     | 1261           |              |
| CH <sub>2</sub> Wagging                                                      |            |              |                | 1331         |
| H-C Bending in plane Imidazole + CH <sub>3</sub> Torsion                     |            |              | 1217           | 1226         |
| OOCC-H Stretching + CH <sub>2</sub> Torsion                                  |            |              |                | 1174         |
| HC-NH Stretching                                                             |            |              | 1069           | 1519/1078    |
| HC=NH                                                                        | 1126/1081  | 1121/1069    |                |              |
| C=N-C Asymmetric Stretching                                                  | 972        | 973          |                |              |
| C-N(CH <sub>3</sub> ) <sub>3</sub>                                           |            | 868          |                |              |
| CH <sub>2</sub> Rocking                                                      | 972        | 825          | 973/903        | 964/877      |
| N-CH <sub>3</sub> Stretching                                                 |            | 921          | 929            | 929/711      |
| CH <sub>2</sub> Rocking + C-COO Stretching                                   |            |              |                | 842          |
| (N=)C-H Bending out of plane + C-N(CH <sub>3</sub> ) <sub>3</sub> Stretching |            |              |                | 807          |
| COO Scissoring                                                               |            | 798          |                |              |
| (C-)C-H Bending out of plane                                                 | 822        | 737          | 816            | 763          |
| Imidazole Torsion                                                            |            |              | 632            | 685          |
| HC-CH <sub>2</sub> Stretching                                                |            |              |                | 606          |
| Imidazole Bending out of plane                                               | 561        | 571          | 554            | 571          |

**Table S6:** IRMPD spectrum of the sodiated molecular ion of protonated *Nε*-Methyl-hercynine [**3+Na**]<sup>+</sup> at *m/z* 234 and the band origins of the computed ET ions

| Vibrational Mode                                                             | Experiment | Theory       |              |              |
|------------------------------------------------------------------------------|------------|--------------|--------------|--------------|
|                                                                              |            | (3Nε+Na) (a) | (3Nε+Na) (b) | (3Nε+Na) (c) |
| COO Asymmetric Stretching                                                    | 1642       | 1703         | 1595         | 1633         |
| HC=N Stretching + CH <sub>3</sub> Wagging Imidazole                          | 1514/1489  | 1502         | 1486/1408    | 1494         |
| CH <sub>3</sub> Wagging Betaine                                              |            | 1432/1401    |              |              |
| CH <sub>2</sub> Scissoring                                                   | 1424       |              |              | 1424         |
| CH Bending + OCCC-H Bending                                                  | 1384/1354  | 1323         | 1377         |              |
| OCCC-H Bending                                                               |            | 1207         |              |              |
| HC-COO Stretching                                                            |            |              |              | 1370         |
| H <sub>3</sub> CN-CH Stretching                                              |            |              |              | 1339         |
| CH <sub>2</sub> Wagging + OCCC-H Bending                                     |            |              |              | 1315         |
| CH <sub>2</sub> Torsion                                                      |            |              | 1253         | 1292         |
| C-H Bending in plane Imidazole                                               | 1239       |              | 1346         | 1230         |
| CH <sub>2</sub> Torsion + OCCC-H Bending                                     | 1173       |              |              | 1176         |
| (C=)N-C(=N) Stretching                                                       | 979        | 989          | 1284         |              |
| (C-)C-H Bending in plane                                                     | 1158       | 1152         | 1145         | 1152         |
| H Imidazole in plane                                                         |            |              | 1222         |              |
| CH <sub>3</sub> Torsion Betaine                                              |            | 803          | 1447/1121    | 1114         |
| CH <sub>3</sub> Torsion Imidazole                                            |            |              | 1051         | 178          |
| CH <sub>2</sub> -CH Stretching                                               |            |              |              | 1020         |
| N-CH <sub>3</sub> Stretching Betaine                                         |            | 920          |              |              |
| Imidazole Stretching                                                         |            |              |              | 966          |
| Betaine Motion/Combined Deformation                                          | 944        |              |              | 935          |
| CH <sub>2</sub> Rocking                                                      |            | 1176         | 896          | 873          |
| CH <sub>2</sub> Rocking + HC-COO Stretching                                  |            |              |              | 842          |
| CH <sub>2</sub> Rocking + H Imidazole Bending out of plane                   |            | 826          |              |              |
| C-N(CH <sub>3</sub> ) <sub>3</sub> Stretching                                | 875/820    | 873          |              | 811          |
| H <sub>2</sub> C-C Stretching Imidazole                                      |            |              | 733          |              |
| (C-)C-H Bending out of plane                                                 |            | 764          | 710          | 757          |
| (C-)C-H Bending out of plane + C-N(CH <sub>3</sub> ) <sub>3</sub> Stretching |            | 733          | 811          | 710          |
| COO Wagging                                                                  |            |              | 679          |              |
| Imidazole Torsion                                                            |            | 987          |              | 687          |
| Imidazole Bending out of plane                                               |            | 625          |              | 625          |

Accurate ion masses determined of the following molecular ions:

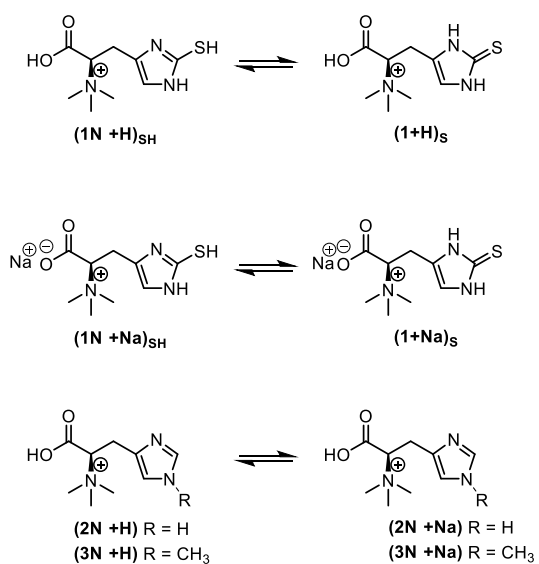

**Table S7:** Accurate masses of the probed molecular ions with composition and experimental error.

| Molecular ion                            | Theoretical mass (u) | Experimental mass (u) | Difference (mmu) |
|------------------------------------------|----------------------|-----------------------|------------------|
| $[1+H]^+$<br>$[C_9H_{16}O_2N_3S]^+$      | 230.09577            | 230.0957              | 0.00261          |
| $[1+Na]^+$<br>$[C_9H_{15}O_2N_3NaS]^+$   | 252.0777             | 252.0776              | -0.02940         |
| $[2+H]^+$<br>$[C_9H_{16}O_2N_3]^+$       | 198.12370            | 198.12391             | 0.20503          |
| $[2+Na]^+$<br>$[C_9H_{15}O_2N_3Na]^+$    | 220.10565            | 220.10583             | 0.17918          |
| $[3+H]^+$<br>$[C_{10}H_{18}O_2N_3]^+$    | 212.13935            | 212.13774             | -1.61552         |
| $[3+Na]^+$<br>$[C_{10}H_{17}O_2N_3Na]^+$ | 234.12130            | 234.11967             | -1.62716         |



**Table S8:** Product ions used for IRMPD experiments of the following molecular ions.

| Precursor ion species                        | IRMPD Product ions                           | Neutral Loss                                                                                                                       |
|----------------------------------------------|----------------------------------------------|------------------------------------------------------------------------------------------------------------------------------------|
| $(1N\epsilon+H)_{SH}/(1+H)_S$<br>$m/z$ 230   | 60 ( $HNMe_3^+$ )<br>99<br>100<br>127<br>186 | 170 Da<br>131 Da ( $NMe_3, CO_2, C_2H_4$ )<br>130 Da ( $CH_2NMe_2, CO_2, C_2H_4$ )<br>103 Da ( $NMe_3, CO_2$ )<br>44 Da ( $CO_2$ ) |
| $(2N\epsilon+H)$<br>$m/z$ 198                | 60 ( $HNMe_3^+$ )<br>95<br>154               | 138 Da<br>103 Da ( $NMe_3, CO_2$ )<br>44 Da ( $CO_2$ )                                                                             |
| $(3N\epsilon+H)$<br>$m/z$ 212                | 153<br>168                                   | 59 Da ( $NMe_3$ )<br>44 Da ( $CO_2$ )                                                                                              |
| $(1N\epsilon+Na)_{SH}/(1+Na)_S$<br>$m/z$ 252 | 99<br>149<br>165                             | 153 Da ( $NMe_3, CO_2, C_2H_4, Na^+$ )<br>103 Da ( $NMe_3$ & $CO_2$ )<br>87 Da                                                     |
| $(2N\epsilon+Na)$<br>$m/z$ 220               | 117<br>133<br>161<br>176                     | 103 Da ( $NMe_3$ & $CO_2$ )<br>87 Da<br>59 Da ( $NMe_3$ )<br>44 Da ( $CO_2$ )                                                      |
| $(3N\epsilon+Na)$<br>$m/z$ 234               | 131<br>147<br>160<br>175<br>190              | 103 Da ( $NMe_3, CO_2$ )<br>87 Da<br>74 Da ( $NMe_3, \bullet CH_3$ )<br>59 Da ( $NMe_3$ )<br>44 Da ( $CO_2$ )                      |

## S3. COMPUTATIONAL SUMMARY

Coordinates of the three isomers **a**, **b**, **c** identified by theory of each of the analyte complex ions included in the study:

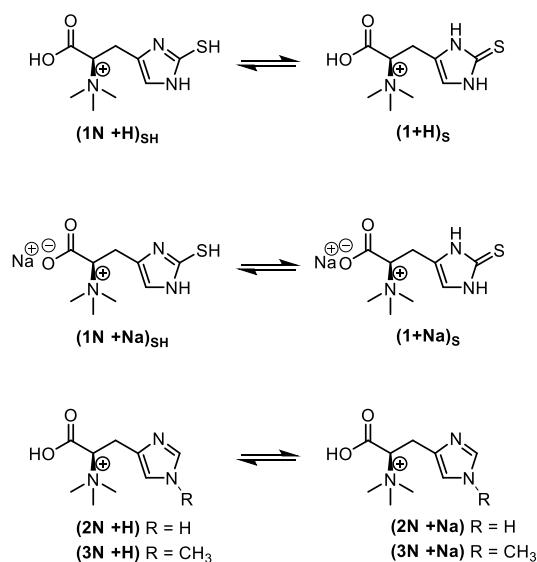

**Protonated ET  $(1+H)_S$  thione structure a** at 26.2 kJmol<sup>-1</sup>  **$(1N\epsilon+H)_{SH}$  thiol structures b** at 0 kJmol<sup>-1</sup>, **c** at 3.9 kJmol<sup>-1</sup> and **c2** at 4.8 kJmol<sup>-1</sup>

**Sodiated ET thiols  $(1N\epsilon+Na)_{SH}$  a** at 42.8 kJmol<sup>-1</sup>, **b** at 18.4 kJmol<sup>-1</sup> and ET thione  **$(1+Na)_S$  structure c** at 0.0 kJmol<sup>-1</sup>

**Protonated hercynine  $(2N\epsilon+H)$  ion structure a** at 11.3 kJmol<sup>-1</sup> **b** at 5.2 kJmol<sup>-1</sup> and structure **c** at 0.0 kJmol<sup>-1</sup>.

**Sodiated hercynine  $(2N\epsilon+Na)$  ion structures a** (16.2 kJmol<sup>-1</sup>), **b** (13.2 kJmol<sup>-1</sup>), **c** (0.0 kJmol<sup>-1</sup>)

**Protonated Nε-Methyl-hercynine  $(3N\epsilon+H)$  ion structures a** at 14.0 kJmol<sup>-1</sup>, **b** at 7.4 kJmol<sup>-1</sup> and **c** at 0.0 kJmol<sup>-1</sup>

**Sodiated Nε-Methyl-Hercynine  $(3N\epsilon+Na)$  ion structures a** at 15.3 kJmol<sup>-1</sup>, **b** at 15.1 kJmol<sup>-1</sup> and **c** at 0.0 kJmol<sup>-1</sup>

S4. ERGOTHIONINE (1+H)<sub>s</sub> (THIONE; ISOMER A)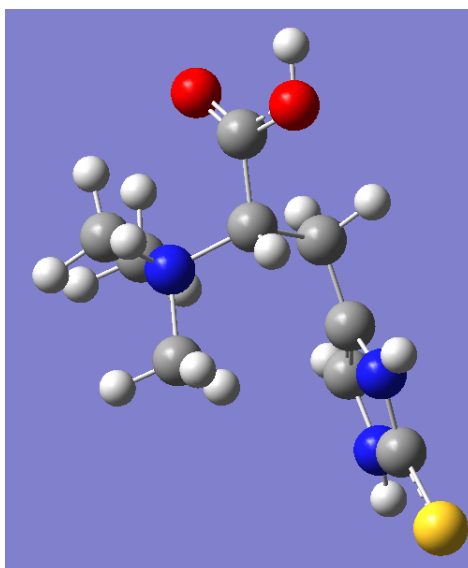

```

Route : # opt freq b3lyp/cc-pvtz geom=connectivity empiricaldispersion=gd3bj i
       : nt=ultrafine pop=regular
SMILES : C[N](C)(C)C(Cc1c[nH]c(=S)[nH]1)C(=O)O
Formula : C9H16N3O2S+
Charge : 1
Multiplicity : 1
Energy : -1065.59676147 a.u.
Gibbs Energy : -1065.37833900 a.u.
Number of imaginary frequencies : 0

```

## S4.1. Cartesian Co-ordinates (XYZ format)

31

```

C 1.64597702 0.17393699 1.74658895
C 0.91077697 -0.51892000 0.84719300
C 3.00559711 -0.22725600 -0.04451100
N 2.90312004 0.35273001 1.19985497
H 1.37974000 0.54470402 2.71953893
N 1.74142206 -0.74948400 -0.24508999
S 4.30123091 -0.28410101 -1.06254005
C -0.51059300 -0.93872702 0.88054699
H -0.93994898 -0.70332903 1.85217798
H -0.57973802 -2.02510595 0.77525997
C -1.42139804 -0.38619301 -0.24681801
H -1.00822496 -0.65063602 -1.21656406
N -1.58928096 1.13876998 -0.29728901
C -2.76821399 -1.09026301 -0.08438400
O -3.67482305 -0.69707298 0.59817600
O -2.75242996 -2.24145293 -0.75780499
C -0.33337000 1.77197194 -0.84553802
H 0.48936000 1.58425796 -0.16999801
H -0.12396600 1.35139704 -1.82396305
H -0.51355398 2.83885503 -0.93136102

```

```

C -1.88355899 1.73535597 1.05322897
H -2.75496411 1.24453795 1.46947300
H -1.01546597 1.60415697 1.68861496
H -2.07335997 2.79485297 0.91082901
C -2.70927000 1.49076998 -1.24640596
H -2.69756508 2.56596994 -1.39247298
H -2.53135395 0.99039400 -2.19441700
H -3.65458393 1.18245101 -0.81909698
H -3.57524896 -2.72708702 -0.58003300
H 3.69436097 0.78897601 1.64154506
H 1.56411600 -1.35488701 -1.02810705

```

#### S4.2. Frequencies

| Mode | IR frequency  | IR intensity |
|------|---------------|--------------|
| 1    | 35.63550000   | 3.64890000   |
| 2    | 41.38270000   | 5.80940000   |
| 3    | 56.46510000   | 0.87710000   |
| 4    | 78.45510000   | 2.06190000   |
| 5    | 99.24890000   | 0.86990000   |
| 6    | 165.17820000  | 4.67640000   |
| 7    | 174.68950000  | 3.35270000   |
| 8    | 215.09810000  | 1.60030000   |
| 9    | 226.44840000  | 0.89740000   |
| 10   | 259.58850000  | 1.59100000   |
| 11   | 277.73630000  | 0.77580000   |
| 12   | 289.02680000  | 0.53570000   |
| 13   | 307.05450000  | 0.90580000   |
| 14   | 318.77400000  | 1.20840000   |
| 15   | 343.44650000  | 4.32100000   |
| 16   | 355.63080000  | 2.20420000   |
| 17   | 397.37540000  | 0.22240000   |
| 18   | 419.23660000  | 0.99700000   |
| 19   | 436.34240000  | 1.52680000   |
| 20   | 476.77920000  | 2.75890000   |
| 21   | 494.37370000  | 41.49800000  |
| 22   | 521.96580000  | 9.79390000   |
| 23   | 562.80300000  | 31.17980000  |
| 24   | 580.04120000  | 79.79700000  |
| 25   | 617.98020000  | 56.40650000  |
| 26   | 647.22450000  | 54.32630000  |
| 27   | 660.56430000  | 46.43980000  |
| 28   | 675.78350000  | 10.85870000  |
| 29   | 716.49500000  | 15.16620000  |
| 30   | 740.65470000  | 2.96700000   |
| 31   | 793.72100000  | 44.66290000  |
| 32   | 799.52050000  | 19.33660000  |
| 33   | 851.24020000  | 22.75430000  |
| 34   | 911.50300000  | 21.95060000  |
| 35   | 938.08900000  | 34.05900000  |
| 36   | 966.00010000  | 18.87790000  |
| 37   | 974.40920000  | 10.69370000  |
| 38   | 1001.95050000 | 14.37950000  |
| 39   | 1010.53960000 | 16.38700000  |
| 40   | 1037.93030000 | 0.86200000   |
| 41   | 1077.52620000 | 0.22450000   |
| 42   | 1102.37800000 | 67.06050000  |
| 43   | 1136.72650000 | 36.40500000  |
| 44   | 1147.52690000 | 10.29930000  |
| 45   | 1167.63470000 | 162.46390000 |
| 46   | 1178.05240000 | 138.89360000 |
| 47   | 1206.62150000 | 13.04100000  |

|    |               |              |
|----|---------------|--------------|
| 48 | 1220.00970000 | 1.70740000   |
| 49 | 1253.25600000 | 13.80150000  |
| 50 | 1272.66390000 | 0.80040000   |
| 51 | 1287.56580000 | 13.57030000  |
| 52 | 1295.29250000 | 7.52340000   |
| 53 | 1306.91260000 | 24.05600000  |
| 54 | 1361.32290000 | 71.58120000  |
| 55 | 1366.79840000 | 5.72890000   |
| 56 | 1390.94780000 | 14.13610000  |
| 57 | 1420.48920000 | 10.06940000  |
| 58 | 1424.35320000 | 46.06270000  |
| 59 | 1446.73880000 | 13.60320000  |
| 60 | 1449.00680000 | 1.15020000   |
| 61 | 1476.48380000 | 18.41860000  |
| 62 | 1481.57630000 | 6.56880000   |
| 63 | 1492.30910000 | 83.78190000  |
| 64 | 1496.78410000 | 14.65550000  |
| 65 | 1500.91890000 | 2.91500000   |
| 66 | 1509.52810000 | 333.39340000 |
| 67 | 1513.97270000 | 184.88810000 |
| 68 | 1519.98690000 | 21.22840000  |
| 69 | 1536.84930000 | 45.00540000  |
| 70 | 1672.18270000 | 6.56890000   |
| 71 | 1824.66860000 | 261.53290000 |
| 72 | 3031.08290000 | 7.48990000   |
| 73 | 3080.59080000 | 0.51420000   |
| 74 | 3085.75550000 | 2.80080000   |
| 75 | 3090.03690000 | 4.97770000   |
| 76 | 3103.43600000 | 0.46290000   |
| 77 | 3117.64910000 | 1.23090000   |
| 78 | 3163.06730000 | 0.32060000   |
| 79 | 3170.15960000 | 1.56040000   |
| 80 | 3173.67070000 | 1.80240000   |
| 81 | 3195.37890000 | 2.19240000   |
| 82 | 3199.58550000 | 2.89380000   |
| 83 | 3208.43440000 | 7.46670000   |
| 84 | 3269.39430000 | 5.93760000   |
| 85 | 3647.48790000 | 77.39000000  |
| 86 | 3652.13090000 | 119.21880000 |
| 87 | 3707.28610000 | 174.12610000 |

S5. ERGOTHIONINE (1N $\epsilon$ +H)<sub>SH</sub> (THIOL; ISOMER B)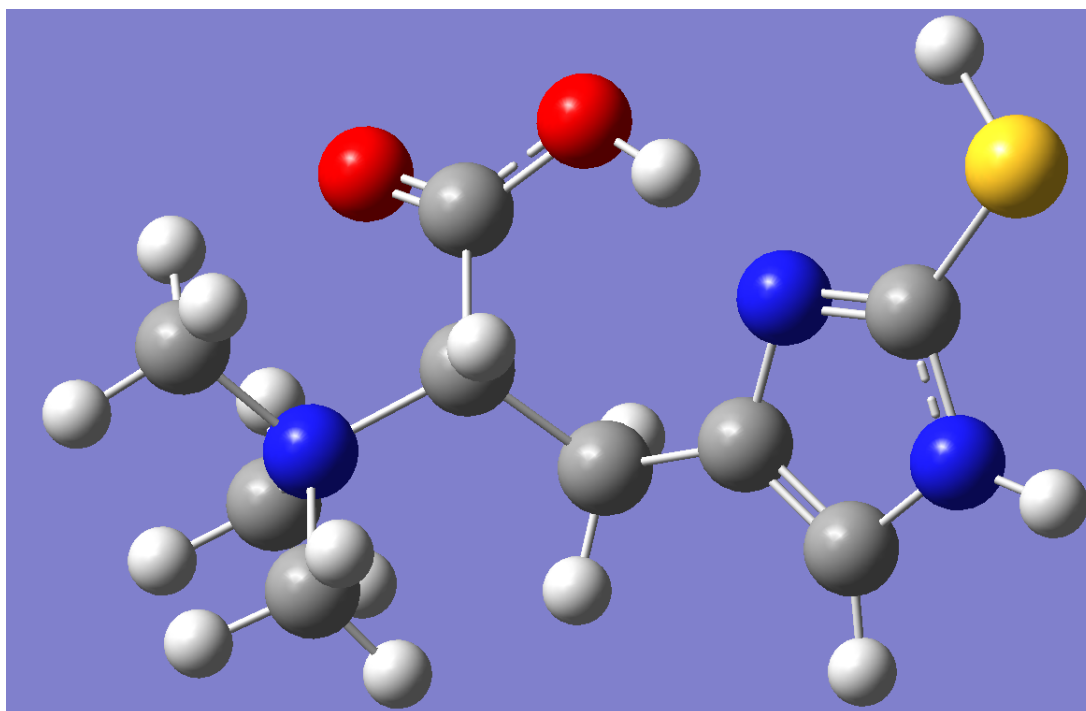

```

Route                : # opt freq b3lyp/cc-pvtz geom=connectivity empiricaldispersion=gd3bj i
                    : nt=ultrafine pop=regular
SMILES               : C[N](C)(C)C(Cc1c[nH]c(n1)S)C(=O)O
Formula              : C9H16N3O2S+
Charge               : 1
Multiplicity         : 1
Energy               : -1065.60307476
Gibbs Energy        : -1065.38832400
Number of imaginary frequencies : 0

```

a.u.

a.u.

## S5.1. Cartesian Co-ordinates (XYZ format)

31

```

C -1.80408800  1.98344100 -0.64950001
C -0.95986801  0.91549999 -0.60880297
C -2.90134192  0.17243899  0.01740900
N -3.03598690  1.49411297 -0.25687999
H -1.65949595  3.01209307 -0.92322701
N -1.65188706 -0.20287099 -0.18133700
S -4.24327993 -0.79868501  0.58722699
C  0.49308601  0.81690401 -0.95212901
H  0.90314299  1.82207298 -0.98629302
H  0.62045503  0.39884400 -1.95261097
C  1.25023603 -0.07178300  0.06836500
H  0.72108698 -0.04723400  1.01923800
N  2.65112996  0.45201001  0.41202199
C  1.27981806 -1.53948903 -0.42971501
O  2.30059695 -2.08485293 -0.77014601

```

O 0.10664400 -2.11920500 -0.46581301  
 C 2.52240705 1.78810894 1.08741200  
 H 2.10110211 2.51537991 0.40489200  
 H 1.88576198 1.68223703 1.96070397  
 H 3.51373792 2.11085796 1.38910604  
 C 3.52824497 0.59793800 -0.80393600  
 H 3.62948298 -0.37405300 -1.26924396  
 H 3.07309508 1.30871403 -1.48520195  
 H 4.49245787 0.97386402 -0.47510299  
 C 3.32110810 -0.47441500 1.40091097  
 H 4.24960518 -0.00852900 1.71561694  
 H 2.66148305 -0.59788299 2.25535798  
 H 3.50928497 -1.42429805 0.92066300  
 H -3.64487004 -1.96966505 0.30878100  
 H -0.66777098 -1.49310303 -0.26008201  
 H -3.89407802 2.01875901 -0.21280099

## S5.2. Frequencies

| Mode | IR frequency  | IR intensity |
|------|---------------|--------------|
| 1    | 36.45090000   | 0.98470000   |
| 2    | 49.57700000   | 1.56110000   |
| 3    | 82.22390000   | 1.75520000   |
| 4    | 91.70090000   | 11.98000000  |
| 5    | 107.50510000  | 6.17350000   |
| 6    | 121.23020000  | 4.32200000   |
| 7    | 171.45950000  | 9.37040000   |
| 8    | 193.53710000  | 1.98580000   |
| 9    | 230.08350000  | 4.24660000   |
| 10   | 253.35680000  | 6.54140000   |
| 11   | 257.84500000  | 0.71680000   |
| 12   | 266.83810000  | 9.04240000   |
| 13   | 280.51600000  | 2.60750000   |
| 14   | 302.39170000  | 11.15130000  |
| 15   | 331.58270000  | 5.39780000   |
| 16   | 336.81650000  | 10.19590000  |
| 17   | 363.79420000  | 6.65420000   |
| 18   | 384.26260000  | 3.43800000   |
| 19   | 430.43070000  | 2.94110000   |
| 20   | 439.82580000  | 0.57620000   |
| 21   | 473.83020000  | 0.35140000   |
| 22   | 494.59510000  | 1.10630000   |
| 23   | 553.76190000  | 3.23000000   |
| 24   | 581.88820000  | 79.00200000  |
| 25   | 644.38370000  | 3.34040000   |
| 26   | 675.84900000  | 10.33450000  |
| 27   | 700.69990000  | 1.12440000   |
| 28   | 735.61690000  | 1.22680000   |
| 29   | 759.42980000  | 9.80020000   |
| 30   | 776.47100000  | 19.63820000  |
| 31   | 811.76400000  | 24.96590000  |
| 32   | 848.60720000  | 6.70280000   |
| 33   | 906.85280000  | 50.68910000  |
| 34   | 927.72590000  | 21.87570000  |
| 35   | 943.98970000  | 18.90580000  |
| 36   | 971.50000000  | 16.63330000  |
| 37   | 998.60460000  | 16.83410000  |
| 38   | 1013.31410000 | 31.48440000  |
| 39   | 1024.43760000 | 6.81980000   |
| 40   | 1035.44850000 | 11.43550000  |
| 41   | 1048.78320000 | 26.14520000  |
| 42   | 1075.32430000 | 0.36610000   |

|    |               |               |
|----|---------------|---------------|
| 43 | 1118.08640000 | 40.81190000   |
| 44 | 1138.68500000 | 3.49850000    |
| 45 | 1149.83910000 | 3.92640000    |
| 46 | 1204.63940000 | 3.63830000    |
| 47 | 1234.53760000 | 6.19290000    |
| 48 | 1241.92490000 | 30.89600000   |
| 49 | 1254.38410000 | 57.14760000   |
| 50 | 1277.67060000 | 57.10010000   |
| 51 | 1295.01530000 | 8.88210000    |
| 52 | 1296.56100000 | 1.97000000    |
| 53 | 1327.14270000 | 16.48320000   |
| 54 | 1349.11400000 | 20.86100000   |
| 55 | 1367.97880000 | 18.14230000   |
| 56 | 1414.46720000 | 10.21760000   |
| 57 | 1438.90840000 | 11.74720000   |
| 58 | 1447.53770000 | 26.18220000   |
| 59 | 1451.59440000 | 57.18520000   |
| 60 | 1475.51040000 | 1.24140000    |
| 61 | 1484.10800000 | 28.09550000   |
| 62 | 1491.96560000 | 3.76280000    |
| 63 | 1496.37510000 | 3.25690000    |
| 64 | 1507.55930000 | 9.24720000    |
| 65 | 1508.78750000 | 8.20400000    |
| 66 | 1514.45560000 | 33.78880000   |
| 67 | 1524.28160000 | 43.33340000   |
| 68 | 1526.40450000 | 301.26870000  |
| 69 | 1539.48150000 | 35.95100000   |
| 70 | 1619.71900000 | 51.75170000   |
| 71 | 1814.39410000 | 397.81900000  |
| 72 | 2690.10250000 | 4.75880000    |
| 73 | 2779.34120000 | 2014.41000000 |
| 74 | 3044.38300000 | 7.86840000    |
| 75 | 3079.58980000 | 2.95680000    |
| 76 | 3083.41130000 | 1.33900000    |
| 77 | 3086.53030000 | 6.37890000    |
| 78 | 3090.58730000 | 3.87380000    |
| 79 | 3119.82130000 | 7.12530000    |
| 80 | 3160.61560000 | 0.77350000    |
| 81 | 3166.88150000 | 1.63930000    |
| 82 | 3169.98500000 | 4.43470000    |
| 83 | 3188.60700000 | 3.34000000    |
| 84 | 3199.05880000 | 4.67720000    |
| 85 | 3210.65520000 | 9.50010000    |
| 86 | 3276.37580000 | 4.21230000    |
| 87 | 3637.40310000 | 119.24870000  |



**S6. ERGOTHIONINE (1N $\epsilon$ +H)<sub>SH</sub> (THIOL; ISOMER C)**

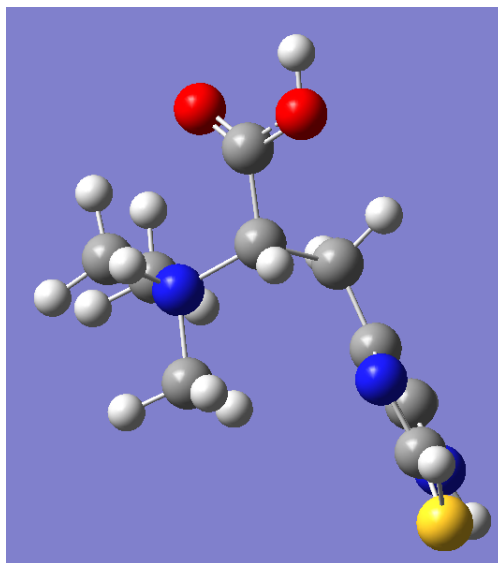

Route : # opt freq b3lyp/cc-pvtz geom=connectivity empiricaldispersion=gd3bj i  
 : nt=ultrafine pop=regular  
 SMILES : C[N](C)(C)C(Cc1c[nH]c(n1)S)C(=O)O  
 Formula : C<sub>9</sub>H<sub>16</sub>N<sub>3</sub>O<sub>2</sub>S<sup>+</sup>  
 Charge : 1  
 Multiplicity : 1  
 Energy : -1065.59993352 a.u.  
 Gibbs Energy : -1065.38682100 a.u.  
 Number of imaginary frequencies : 0

**S6.1. Cartesian Co-ordinates (XYZ format)**

31

```

C -1.76267898 0.26136500 1.97699904
C -0.92081100 0.54472798 0.94027197
C -2.84363604 0.18195200 0.04578800
N -2.99432206 0.03704400 1.39137602
H -1.61999094 0.22395401 3.04151893
N -1.59950197 0.48281401 -0.25961000
S -4.18526983 -0.06833700 -1.05942297
C 0.52136600 0.93082201 0.96469897
H 0.98189998 0.70425701 1.92441297
H 0.59406400 2.01399302 0.84437197
C 1.34262300 0.35211599 -0.20296900
H 0.74384999 0.45325699 -1.10519195
N 1.67283106 -1.14502203 -0.10717700
C 2.60841203 1.19131899 -0.35422999
O 3.69023800 0.92842501 0.10077600
O 2.32181096 2.30306911 -1.03485501
C 0.40849701 -1.95651996 -0.23030201
H -0.21860600 -1.77340806 0.63246900
H -0.11850000 -1.65867496 -1.12993097
H 0.69397902 -3.00288796 -0.27699000
C 2.35059309 -1.51964498 1.18332899
  
```

H 3.24274707 -0.91767502 1.29990995  
 H 1.65976095 -1.35639501 2.00240302  
 H 2.60246491 -2.57448792 1.12833703  
 C 2.56195402 -1.52834105 -1.26285195  
 H 2.67348909 -2.60780501 -1.25858796  
 H 2.08349800 -1.21160996 -2.18530512  
 H 3.52776504 -1.05380201 -1.14658201  
 H 3.11246991 2.86621308 -1.06226397  
 H -3.58808494 0.57988900 -2.07378888  
 H -3.85733199 -0.14640801 1.87566495

## S6.2. Frequencies

| Mode | IR frequency  | IR intensity |
|------|---------------|--------------|
| 1    | 10.74730000   | 1.00690000   |
| 2    | 45.13750000   | 3.06660000   |
| 3    | 59.46750000   | 1.88070000   |
| 4    | 70.92620000   | 2.61570000   |
| 5    | 96.56520000   | 0.94480000   |
| 6    | 125.16860000  | 15.76250000  |
| 7    | 182.81750000  | 0.70820000   |
| 8    | 184.94400000  | 22.53020000  |
| 9    | 221.87090000  | 1.98350000   |
| 10   | 228.98510000  | 3.99330000   |
| 11   | 262.71510000  | 0.83010000   |
| 12   | 271.95580000  | 0.96490000   |
| 13   | 295.99080000  | 1.17490000   |
| 14   | 298.69630000  | 1.57500000   |
| 15   | 315.52770000  | 2.38410000   |
| 16   | 348.36340000  | 3.36850000   |
| 17   | 361.55730000  | 8.79040000   |
| 18   | 376.22830000  | 8.67990000   |
| 19   | 427.88150000  | 1.52900000   |
| 20   | 434.64230000  | 1.92690000   |
| 21   | 472.93970000  | 0.15410000   |
| 22   | 487.88730000  | 1.28480000   |
| 23   | 559.52220000  | 29.45050000  |
| 24   | 563.46280000  | 52.96320000  |
| 25   | 614.82120000  | 73.43360000  |
| 26   | 651.13980000  | 24.96570000  |
| 27   | 661.58790000  | 47.52670000  |
| 28   | 701.18510000  | 6.63300000   |
| 29   | 724.93870000  | 8.98690000   |
| 30   | 747.20060000  | 7.73590000   |
| 31   | 771.41770000  | 23.12580000  |
| 32   | 798.88750000  | 17.54410000  |
| 33   | 857.68040000  | 24.33950000  |
| 34   | 910.53350000  | 14.68700000  |
| 35   | 918.60060000  | 23.76940000  |
| 36   | 946.38000000  | 25.79790000  |
| 37   | 969.71370000  | 16.63790000  |
| 38   | 995.81120000  | 5.45190000   |
| 39   | 1006.29780000 | 35.28450000  |
| 40   | 1023.12970000 | 4.17950000   |
| 41   | 1055.97000000 | 0.81520000   |
| 42   | 1081.33490000 | 0.05310000   |
| 43   | 1109.17080000 | 27.58940000  |
| 44   | 1137.67770000 | 32.96030000  |
| 45   | 1149.29990000 | 22.59200000  |
| 46   | 1169.34810000 | 155.48420000 |
| 47   | 1197.18630000 | 18.99560000  |
| 48   | 1232.28430000 | 17.02250000  |

|    |               |              |
|----|---------------|--------------|
| 49 | 1253.53250000 | 19.53910000  |
| 50 | 1274.57680000 | 1.98510000   |
| 51 | 1292.61850000 | 4.92790000   |
| 52 | 1294.71170000 | 1.81150000   |
| 53 | 1303.10560000 | 2.55690000   |
| 54 | 1337.43120000 | 41.77610000  |
| 55 | 1362.39610000 | 45.23660000  |
| 56 | 1386.03790000 | 35.10090000  |
| 57 | 1431.00780000 | 9.94510000   |
| 58 | 1438.21630000 | 31.18680000  |
| 59 | 1446.84690000 | 21.80340000  |
| 60 | 1454.71150000 | 1.56670000   |
| 61 | 1472.54120000 | 7.07500000   |
| 62 | 1481.03470000 | 7.09460000   |
| 63 | 1492.10990000 | 39.74860000  |
| 64 | 1498.17130000 | 6.34430000   |
| 65 | 1502.26260000 | 2.03190000   |
| 66 | 1513.42490000 | 30.72720000  |
| 67 | 1514.27220000 | 96.15850000  |
| 68 | 1519.22760000 | 28.95180000  |
| 69 | 1537.35930000 | 56.14280000  |
| 70 | 1606.95570000 | 10.71290000  |
| 71 | 1818.14480000 | 273.76740000 |
| 72 | 2692.78780000 | 4.71180000   |
| 73 | 3045.19120000 | 4.75240000   |
| 74 | 3081.00660000 | 1.16090000   |
| 75 | 3084.75190000 | 2.76840000   |
| 76 | 3089.70430000 | 8.23230000   |
| 77 | 3099.70970000 | 8.80520000   |
| 78 | 3112.90600000 | 2.79070000   |
| 79 | 3163.90370000 | 1.07140000   |
| 80 | 3170.52710000 | 1.82220000   |
| 81 | 3176.31300000 | 1.82250000   |
| 82 | 3193.26640000 | 1.52640000   |
| 83 | 3196.76900000 | 0.15300000   |
| 84 | 3200.99720000 | 5.26190000   |
| 85 | 3269.16680000 | 2.57450000   |
| 86 | 3638.28650000 | 108.86900000 |
| 87 | 3716.61840000 | 156.99980000 |

S7. ERGOTHIONINE (1N $\epsilon$ +H)<sub>SH</sub> (THIOL; ISOMER C2)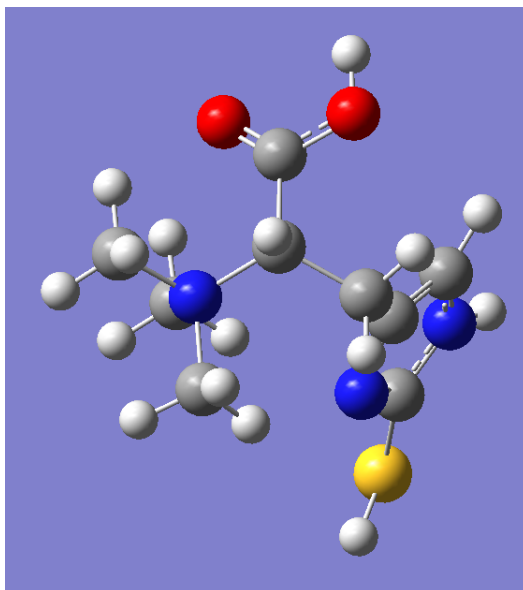

```

Route          : # opt freq b3lyp/cc-pvtz geom=connectivity empiricaldispersion=gd3bj i
                : nt=ultrafine pop=regular
SMILES         : C[N](C)(C)C(Cc1c[nH]c(n1)S)C(=O)O
Formula       : C9H16N3O2S+
Charge        : 1
Multiplicity   : 1
Energy        : -1065.60107865
Gibbs Energy  : -1065.38649200
Number of imaginary frequencies : 0

```

a.u.

a.u.

## S7.1. Cartesian Co-ordinates (XYZ format)

31

```

C -1.68987799 -1.15685999 3.31762409
C -1.10618901 -0.23975401 2.49124408
C -1.81854796 0.87025303 4.19787884
N -2.13935995 -0.43686801 4.40466309
H -1.80317104 -2.22309208 3.24935508
N -1.19840503 1.02478194 3.04730606
S -2.26396704 2.11643696 5.35310078
C -0.41117600 -0.45064500 1.19040298
H -0.06333000 -1.47866595 1.12486506
H 0.47984299 0.17150800 1.15401495
C -1.22921896 -0.23562101 -0.10182200
H -0.54946798 -0.44592401 -0.92905599
N -1.70401704 1.19960701 -0.37970701
C -2.36535001 -1.25272000 -0.24238700
O -3.50006199 -1.02028298 -0.55943799
O -1.89430702 -2.48238111 -0.00732200
C -0.57490599 2.15543008 -0.09962900
H -0.40740001 2.19621801 0.97143501
H 0.31525299 1.82217395 -0.62574100
H -0.87359101 3.13183093 -0.46771100

```

```

C -2.89226103  1.65055001  0.44378000
H -3.73459911  1.00994301  0.22681800
H -2.61531997  1.61734998  1.48975098
H -3.10547090  2.67364192  0.14825800
C -2.06139898  1.31340206 -1.83952606
H -2.36258006  2.33798194 -2.03283405
H -1.18611705  1.06909299 -2.43479300
H -2.87868905  0.63730800 -2.05662203
H -2.61440802 -3.11608100 -0.15619899
H -1.32162905  2.97721100  4.93239880
H -2.56488204 -0.81683898  5.23392677

```

## S7.2. Frequencies

| Mode | IR frequency  | IR intensity |
|------|---------------|--------------|
| 1    | 26.49060000   | 2.48500000   |
| 2    | 39.42400000   | 3.22290000   |
| 3    | 58.72050000   | 1.92570000   |
| 4    | 68.43220000   | 1.91640000   |
| 5    | 111.03050000  | 17.99870000  |
| 6    | 118.87760000  | 1.87900000   |
| 7    | 168.11290000  | 5.34610000   |
| 8    | 209.08910000  | 10.85640000  |
| 9    | 225.51550000  | 1.52820000   |
| 10   | 242.63700000  | 8.97290000   |
| 11   | 268.35830000  | 0.57350000   |
| 12   | 280.58880000  | 0.41410000   |
| 13   | 310.07310000  | 6.40890000   |
| 14   | 323.26680000  | 3.53580000   |
| 15   | 340.95750000  | 5.76870000   |
| 16   | 355.67320000  | 0.35920000   |
| 17   | 369.60150000  | 7.78000000   |
| 18   | 412.84310000  | 1.00090000   |
| 19   | 434.01270000  | 3.42490000   |
| 20   | 441.44840000  | 2.16900000   |
| 21   | 471.58130000  | 0.46360000   |
| 22   | 523.57350000  | 12.47860000  |
| 23   | 548.92480000  | 11.22880000  |
| 24   | 573.24900000  | 66.09830000  |
| 25   | 601.63760000  | 37.73170000  |
| 26   | 650.52870000  | 62.47950000  |
| 27   | 659.55050000  | 20.63240000  |
| 28   | 685.35890000  | 9.93890000   |
| 29   | 707.82000000  | 22.08180000  |
| 30   | 730.37290000  | 10.87360000  |
| 31   | 779.83170000  | 22.10880000  |
| 32   | 805.94140000  | 22.23990000  |
| 33   | 864.83300000  | 3.09710000   |
| 34   | 886.74850000  | 37.60750000  |
| 35   | 918.53350000  | 20.54030000  |
| 36   | 951.64030000  | 19.51580000  |
| 37   | 960.43490000  | 11.24210000  |
| 38   | 987.10860000  | 13.56240000  |
| 39   | 1009.11730000 | 14.89070000  |
| 40   | 1013.59310000 | 4.65760000   |
| 41   | 1047.05870000 | 17.93270000  |
| 42   | 1085.84400000 | 0.46170000   |
| 43   | 1112.20520000 | 32.67760000  |
| 44   | 1144.97510000 | 33.84380000  |
| 45   | 1149.80960000 | 40.70620000  |
| 46   | 1172.86900000 | 158.17920000 |
| 47   | 1205.53840000 | 3.18460000   |

|    |               |              |
|----|---------------|--------------|
| 48 | 1240.92930000 | 9.79380000   |
| 49 | 1253.07010000 | 5.69840000   |
| 50 | 1261.65770000 | 2.05180000   |
| 51 | 1292.41950000 | 1.15470000   |
| 52 | 1298.68400000 | 1.14110000   |
| 53 | 1312.92720000 | 9.64090000   |
| 54 | 1343.05120000 | 12.79370000  |
| 55 | 1359.67220000 | 27.81090000  |
| 56 | 1403.03030000 | 3.96450000   |
| 57 | 1414.06900000 | 17.12980000  |
| 58 | 1433.22030000 | 44.36970000  |
| 59 | 1448.45970000 | 4.45980000   |
| 60 | 1452.04640000 | 4.18830000   |
| 61 | 1481.70730000 | 20.67900000  |
| 62 | 1482.74330000 | 3.63830000   |
| 63 | 1493.56650000 | 18.10580000  |
| 64 | 1501.67370000 | 9.98790000   |
| 65 | 1506.40680000 | 1.01960000   |
| 66 | 1513.51470000 | 86.53230000  |
| 67 | 1518.30590000 | 36.56650000  |
| 68 | 1526.89500000 | 22.41920000  |
| 69 | 1544.57500000 | 31.41380000  |
| 70 | 1607.00030000 | 8.97960000   |
| 71 | 1822.16340000 | 237.69360000 |
| 72 | 2691.73170000 | 3.90090000   |
| 73 | 3060.43240000 | 1.82830000   |
| 74 | 3069.76660000 | 4.33850000   |
| 75 | 3080.90730000 | 2.53700000   |
| 76 | 3090.00160000 | 19.83250000  |
| 77 | 3092.07470000 | 18.22610000  |
| 78 | 3127.20700000 | 1.11880000   |
| 79 | 3159.68420000 | 0.33870000   |
| 80 | 3165.15890000 | 5.35300000   |
| 81 | 3170.30220000 | 1.10650000   |
| 82 | 3176.16020000 | 22.50300000  |
| 83 | 3195.52510000 | 1.88460000   |
| 84 | 3219.88740000 | 18.33360000  |
| 85 | 3273.72650000 | 2.38830000   |
| 86 | 3637.96380000 | 108.86170000 |
| 87 | 3721.14980000 | 149.08560000 |

S8. ERGOTHIONINE (1+H)<sub>s</sub> (THIONE; ISOMER A2)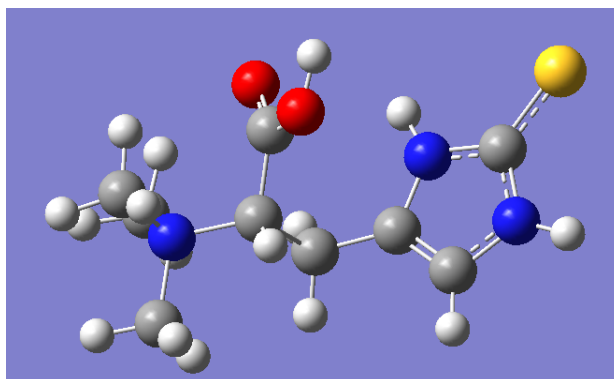

```

Route : # opt freq b3lyp/cc-pvtz geom=connectivity empiricaldispersion=gd3bj i
       : nt=ultrafine pop=regular
SMILES : C[N](C)(C)C(Cc1c[nH]c(=S)[nH]1)C(=O)O
Formula : C9H16N3O2S+
Charge : 1
Multiplicity : 1
Energy : -1065.59572968 a.u.
Gibbs Energy : -1065.37793700 a.u.
Number of imaginary frequencies : 0

```

## S8.1. Cartesian Co-ordinates (XYZ format)

31

```

C 1.60981297 1.92193496 -0.50631601
C 0.88072997 1.10332501 0.28523201
C 2.98056412 0.20349400 0.10694300
N 2.87359309 1.37568605 -0.60495198
H 3.65727592 1.75980401 -1.10412800
H 1.33359396 2.83442211 -1.00189602
N 1.72396195 0.05677800 0.65066999
S 4.28287506 -0.80075502 0.26812100
C -0.56222600 1.12851703 0.64778697
H -0.92458302 2.15110993 0.57173997
H -0.68747801 0.79965103 1.67920804
C -1.37193596 0.20996000 -0.29245299
H -1.30929303 0.58554697 -1.30941701
N -2.87845993 0.16275001 0.01966000
C -0.77944702 -1.20125699 -0.25201401
O -0.21764000 -1.51205695 -1.41561198
O -0.80143201 -1.90220201 0.72583503
C -3.48633289 1.49372697 -0.32288799
H -3.04974008 2.26369905 0.30219001
H -3.30302191 1.70747900 -1.37167203
H -4.55446005 1.43754303 -0.13669500
C -3.17790604 -0.15329100 1.46298397
H -2.66175890 -1.06562102 1.73690903
H -2.84893107 0.67217702 2.08354402
H -4.25309086 -0.27297699 1.55631304
C -3.52391911 -0.88392597 -0.85027403
H -4.60054779 -0.81055701 -0.73288703

```

H -3.24737000 -0.70169997 -1.88457894  
 H -3.18772888 -1.86546004 -0.53377002  
 H 1.52675796 -0.68079197 1.30563200  
 H 0.24880500 -2.36178088 -1.33411300

## S8.2. Frequencies

| Mode | IR frequency  | IR intensity |
|------|---------------|--------------|
| 1    | 27.98450000   | 0.12560000   |
| 2    | 43.35890000   | 2.25890000   |
| 3    | 56.76680000   | 0.24580000   |
| 4    | 65.29840000   | 1.99020000   |
| 5    | 94.41590000   | 2.70930000   |
| 6    | 159.98360000  | 1.56700000   |
| 7    | 182.91200000  | 5.06510000   |
| 8    | 187.58940000  | 3.14730000   |
| 9    | 223.44480000  | 2.25820000   |
| 10   | 242.55670000  | 3.93360000   |
| 11   | 261.76670000  | 0.26830000   |
| 12   | 283.27370000  | 1.48680000   |
| 13   | 292.46350000  | 1.11320000   |
| 14   | 317.43340000  | 0.36720000   |
| 15   | 333.15220000  | 4.30470000   |
| 16   | 345.50510000  | 3.40000000   |
| 17   | 389.96300000  | 1.30240000   |
| 18   | 431.52790000  | 0.92640000   |
| 19   | 432.38870000  | 0.78920000   |
| 20   | 460.82970000  | 0.80860000   |
| 21   | 513.37480000  | 40.22630000  |
| 22   | 520.92580000  | 9.52520000   |
| 23   | 547.15050000  | 12.27980000  |
| 24   | 581.79510000  | 124.05670000 |
| 25   | 637.05240000  | 48.71970000  |
| 26   | 650.61060000  | 40.94440000  |
| 27   | 663.87550000  | 22.00960000  |
| 28   | 683.03930000  | 12.44690000  |
| 29   | 723.29480000  | 32.20760000  |
| 30   | 743.65390000  | 37.82350000  |
| 31   | 788.81470000  | 22.47570000  |
| 32   | 816.46050000  | 34.37840000  |
| 33   | 828.80370000  | 25.18840000  |
| 34   | 907.36170000  | 26.75680000  |
| 35   | 953.31750000  | 22.14790000  |
| 36   | 964.97230000  | 13.43870000  |
| 37   | 977.52200000  | 13.81690000  |
| 38   | 999.71810000  | 5.63740000   |
| 39   | 1022.34050000 | 1.76120000   |
| 40   | 1046.99380000 | 0.11470000   |
| 41   | 1080.43470000 | 0.04250000   |
| 42   | 1105.08200000 | 62.46820000  |
| 43   | 1137.52650000 | 21.94780000  |
| 44   | 1151.67400000 | 0.68390000   |
| 45   | 1169.08060000 | 111.70120000 |
| 46   | 1179.00880000 | 125.18090000 |
| 47   | 1202.32870000 | 42.61350000  |
| 48   | 1229.15960000 | 3.50340000   |
| 49   | 1247.77240000 | 4.85290000   |
| 50   | 1266.27250000 | 3.95870000   |
| 51   | 1288.99090000 | 7.55330000   |
| 52   | 1298.74640000 | 33.69630000  |
| 53   | 1317.44320000 | 5.76130000   |
| 54   | 1349.20930000 | 10.39470000  |



|    |               |              |
|----|---------------|--------------|
| 55 | 1369.00250000 | 13.13650000  |
| 56 | 1381.59870000 | 9.90410000   |
| 57 | 1425.27450000 | 3.52860000   |
| 58 | 1433.98950000 | 16.58730000  |
| 59 | 1451.52300000 | 14.13370000  |
| 60 | 1453.67320000 | 4.59320000   |
| 61 | 1479.44490000 | 11.86560000  |
| 62 | 1483.98840000 | 11.27780000  |
| 63 | 1491.34020000 | 8.24110000   |
| 64 | 1496.95570000 | 1.29870000   |
| 65 | 1499.49100000 | 2.63270000   |
| 66 | 1511.50960000 | 23.37220000  |
| 67 | 1512.75540000 | 579.64840000 |
| 68 | 1519.33210000 | 21.64330000  |
| 69 | 1533.23700000 | 45.92130000  |
| 70 | 1669.57950000 | 11.84840000  |
| 71 | 1814.14230000 | 209.03250000 |
| 72 | 3061.81670000 | 13.20800000  |
| 73 | 3077.45520000 | 0.30230000   |
| 74 | 3081.18470000 | 0.48460000   |
| 75 | 3088.09720000 | 6.21560000   |
| 76 | 3113.60530000 | 1.17210000   |
| 77 | 3127.00130000 | 1.43010000   |
| 78 | 3164.42240000 | 0.02700000   |
| 79 | 3168.94340000 | 1.12570000   |
| 80 | 3173.44210000 | 1.33070000   |
| 81 | 3176.89190000 | 0.23970000   |
| 82 | 3184.32120000 | 1.11340000   |
| 83 | 3194.33660000 | 4.81590000   |
| 84 | 3272.03950000 | 4.62480000   |
| 85 | 3643.91720000 | 78.76720000  |
| 86 | 3655.94720000 | 121.54070000 |
| 87 | 3694.69640000 | 126.30700000 |

S9. ERGOTHIONINE (1+H)<sub>s</sub> (THIONE; ISOMER A;  $\omega$ -B97X-D)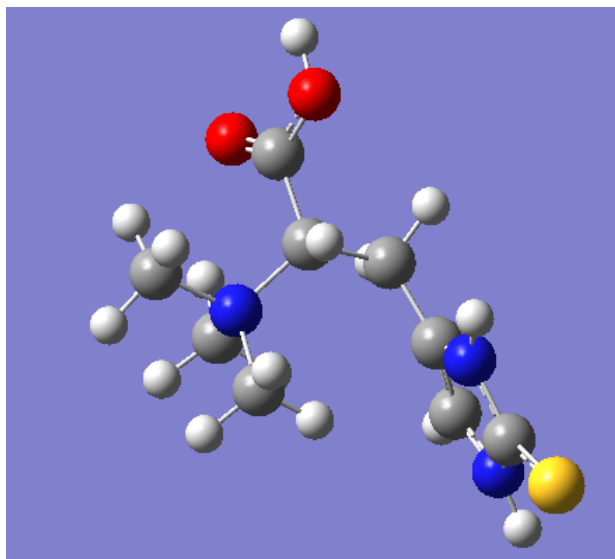

FIG. S1. Molecule

```

Route          : # opt freq wb97xd/cc-pvtz geom=connectivity int=ultrafine pop=regular
SMILES         : C[N](C)(C)C(Cc1c[nH]c(=S)[nH]1)C(=O)O
Formula        : C9H16N3O2S+
Charge         : 1
Multiplicity   : 1
Energy         : -1065.31031255
Gibbs Energy   : -1065.08814700
Number of imaginary frequencies : 0

```

a.u.

a.u.

## S9.1. Cartesian Co-ordinates (XYZ format)

31

```

C  1.62742603  0.24663900  1.76003897
C  0.90767097 -0.47308999  0.87818497
C  2.99652100 -0.19666900  0.00158700
N  2.88529301  0.41444901  1.22009397
H  1.35155404  0.64327800  2.72043300
N  1.74750602 -0.73294801 -0.19450000
S  4.29752588 -0.26851100 -1.00811803
C -0.51199299 -0.90160298  0.91120303
H -0.95148897 -0.63785797  1.87174201
H -0.56783998 -1.99154198  0.84356499
C -1.41240704 -0.39361101 -0.23803701
H -0.99347299 -0.69279701 -1.19663799
N -1.59077299  1.11837399 -0.34312901
C -2.75388503 -1.10565603 -0.05624200
O -3.64433599 -0.71736699  0.64398301
O -2.75062299 -2.24656796 -0.73051602
C -0.35433099  1.73631406 -0.93125498
H  0.48550901  1.57410598 -0.26797101
H -0.16079900  1.28963006 -1.90241396
H -0.53683698  2.80085802 -1.04512000

```

|   |             |             |             |
|---|-------------|-------------|-------------|
| C | -1.86727798 | 1.76164496  | 0.98097599  |
| H | -2.72255898 | 1.27546895  | 1.43737900  |
| H | -0.98433900 | 1.67228305  | 1.60527694  |
| H | -2.07917404 | 2.81195307  | 0.80174398  |
| C | -2.72159696 | 1.42486298  | -1.28288603 |
| H | -2.71573091 | 2.49234796  | -1.48092997 |
| H | -2.56240106 | 0.88116401  | -2.21112895 |
| H | -3.66144490 | 1.13891304  | -0.82580203 |
| H | -3.56533599 | -2.73147893 | -0.53866500 |
| H | 3.66868401  | 0.87190199  | 1.65129995  |
| H | 1.57665002  | -1.34968305 | -0.96870100 |

**S9.2. Frequencies**

| Mode | IR frequency  | IR intensity |
|------|---------------|--------------|
| 1    | 41.21370000   | 4.44340000   |
| 2    | 43.50610000   | 6.19260000   |
| 3    | 56.54490000   | 0.99450000   |
| 4    | 80.59190000   | 1.79390000   |
| 5    | 101.30400000  | 0.90780000   |
| 6    | 169.64220000  | 3.52410000   |
| 7    | 176.50660000  | 4.09080000   |
| 8    | 219.24760000  | 1.55630000   |
| 9    | 235.06540000  | 1.08100000   |
| 10   | 267.42290000  | 1.38580000   |
| 11   | 291.74070000  | 1.15990000   |
| 12   | 302.98470000  | 0.29070000   |
| 13   | 318.92590000  | 1.34340000   |
| 14   | 331.95010000  | 0.90500000   |
| 15   | 354.13110000  | 5.33890000   |
| 16   | 366.92810000  | 1.29850000   |
| 17   | 404.27570000  | 0.36890000   |
| 18   | 431.83520000  | 0.93720000   |
| 19   | 451.06490000  | 1.31010000   |
| 20   | 490.30580000  | 2.82160000   |
| 21   | 515.06530000  | 44.07710000  |
| 22   | 528.05260000  | 8.32860000   |
| 23   | 577.15280000  | 23.07600000  |
| 24   | 599.74380000  | 90.28120000  |
| 25   | 627.64720000  | 55.99340000  |
| 26   | 657.55890000  | 63.69440000  |
| 27   | 673.15350000  | 47.37600000  |
| 28   | 693.68550000  | 6.94380000   |
| 29   | 726.97010000  | 15.89540000  |
| 30   | 757.84620000  | 4.42700000   |
| 31   | 812.35210000  | 12.88120000  |
| 32   | 816.61050000  | 52.86270000  |
| 33   | 880.49450000  | 17.77000000  |
| 34   | 930.37430000  | 20.14920000  |
| 35   | 971.78060000  | 31.20330000  |
| 36   | 990.17790000  | 13.09040000  |
| 37   | 994.92030000  | 13.87670000  |
| 38   | 1018.85990000 | 5.07490000   |
| 39   | 1037.89390000 | 24.94740000  |
| 40   | 1057.18410000 | 1.34460000   |
| 41   | 1086.57080000 | 0.21430000   |
| 42   | 1119.14530000 | 55.52820000  |
| 43   | 1148.46520000 | 15.94200000  |
| 44   | 1159.93420000 | 2.47330000   |
| 45   | 1188.77230000 | 121.06950000 |
| 46   | 1194.27980000 | 192.82080000 |
| 47   | 1224.77490000 | 16.87620000  |
| 48   | 1252.79880000 | 0.38670000   |
| 49   | 1267.72880000 | 17.96960000  |
| 50   | 1291.53140000 | 1.27580000   |
| 51   | 1299.99910000 | 16.69770000  |
| 52   | 1314.82960000 | 18.44580000  |
| 53   | 1322.35660000 | 20.98620000  |
| 54   | 1382.57280000 | 21.85880000  |
| 55   | 1386.07660000 | 47.52730000  |
| 56   | 1410.36080000 | 12.87060000  |
| 57   | 1443.72800000 | 41.50770000  |
| 58   | 1448.22840000 | 35.06970000  |
| 59   | 1457.15560000 | 7.16420000   |
| 60   | 1458.99200000 | 16.58370000  |

|    |               |              |
|----|---------------|--------------|
| 61 | 1480.09720000 | 14.68460000  |
| 62 | 1486.08920000 | 3.48610000   |
| 63 | 1501.56570000 | 18.53270000  |
| 64 | 1502.45280000 | 24.26210000  |
| 65 | 1509.69530000 | 10.30150000  |
| 66 | 1519.67890000 | 12.82380000  |
| 67 | 1531.08570000 | 10.41920000  |
| 68 | 1546.14750000 | 415.80220000 |
| 69 | 1547.96450000 | 272.13920000 |
| 70 | 1707.50350000 | 6.67570000   |
| 71 | 1865.54860000 | 268.49380000 |
| 72 | 3060.65210000 | 5.57700000   |
| 73 | 3092.55880000 | 0.46300000   |
| 74 | 3097.03860000 | 2.58610000   |
| 75 | 3100.23990000 | 4.47790000   |
| 76 | 3123.91950000 | 0.06720000   |
| 77 | 3137.85660000 | 0.81380000   |
| 78 | 3184.70260000 | 0.20770000   |
| 79 | 3190.04880000 | 1.25310000   |
| 80 | 3193.46080000 | 1.19310000   |
| 81 | 3212.36700000 | 2.58400000   |
| 82 | 3216.76620000 | 1.92050000   |
| 83 | 3224.26670000 | 6.14940000   |
| 84 | 3291.80200000 | 6.68490000   |
| 85 | 3687.88620000 | 78.31230000  |
| 86 | 3693.37390000 | 126.36700000 |
| 87 | 3787.17040000 | 181.86810000 |

**S10. ERGOTHIONINE (1N $\epsilon$ +H)<sub>SH</sub> (THIOL; ISOMER B;  $\omega$ -B97X-D)**

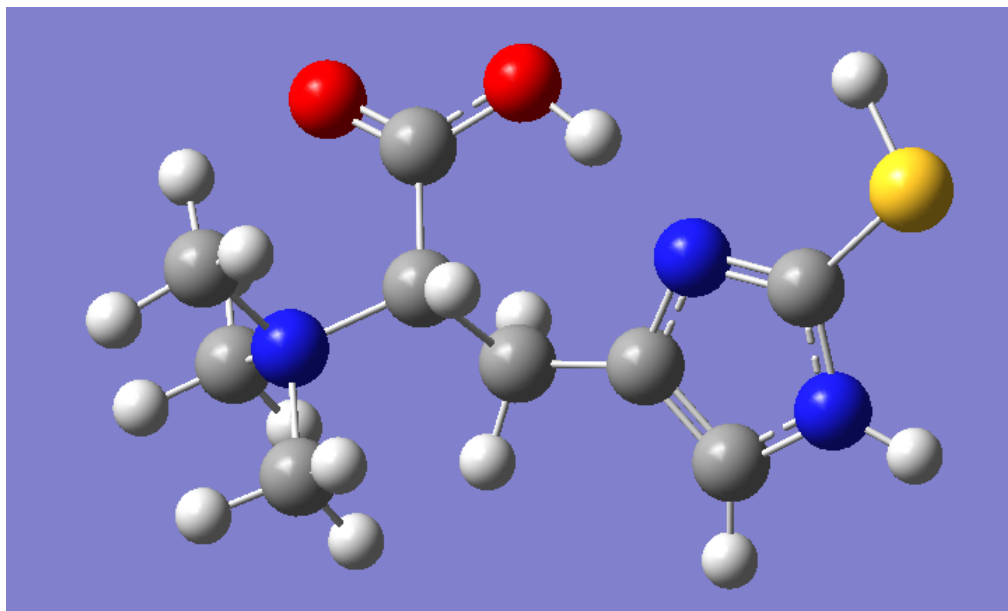

FIG. S2. Molecule

```

Route                : # opt freq wb97xd/cc-pvtz geom=connectivity int=ultrafine pop=regular
SMILES              : C[N](C)(C)C(Cc1c[nH]c(n1)S)C(=O)O
Formula             : C9H16N3O2S+
Charge              : 1
Multiplicity        : 1
Energy              : -1065.31616485
Gibbs Energy        : -1065.09772900
Number of imaginary frequencies : 0

```

a.u.  
a.u.

**S10.1. Cartesian Co-ordinates (XYZ format)**

31

```

C  1.79771996 -1.95270002 -0.63884097
C  0.95645797 -0.88986999 -0.58260500
C  2.87355995 -0.16952200  0.08957400
N  3.01649809 -1.47566402 -0.21615601
H  1.65615594 -2.97361398 -0.94274998
N  1.63449895  0.21341500 -0.11617300
S  4.20186281  0.78581703  0.70896602
C -0.49111000 -0.78609502 -0.94623101
H -0.89634901 -1.79224598 -1.01180995
H -0.60201001 -0.34615999 -1.93910503
C -1.26393604  0.07610100  0.08156600
H -0.73632199  0.04664400  1.03480101
N -2.65226007 -0.46172199  0.40884799
C -1.29921603  1.54929304 -0.39774400
O -2.31341505  2.08915901 -0.75069499
O -0.13614400  2.13897204 -0.40521300
C -2.51433611 -1.79533899  1.07232594
H -2.07593298 -2.51425004  0.39044699

```

H -1.88970101 -1.68994296 1.95514596  
H -3.50453401 -2.13562799 1.36032104  
C -3.51565909 -0.60840702 -0.80747098  
H -3.62500691 0.36466199 -1.27121699  
H -3.05217195 -1.31232095 -1.49158597  
H -4.48000383 -0.99395102 -0.48835200  
C -3.33673596 0.44388300 1.39500999  
H -4.25891685 -0.03739600 1.70713699  
H -2.68264103 0.57696301 2.25313306  
H -3.54348302 1.39416695 0.92089897  
H 3.65124393 1.95959902 0.36819899  
H 0.63064897 1.52417195 -0.19134100  
H 3.87476110 -1.99729800 -0.17327499

**S10.2. Frequencies**

| Mode | IR frequency  | IR intensity |
|------|---------------|--------------|
| 1    | 42.42540000   | 0.84020000   |
| 2    | 51.93550000   | 1.80860000   |
| 3    | 85.09580000   | 0.33310000   |
| 4    | 100.14670000  | 11.20730000  |
| 5    | 108.77090000  | 8.79000000   |
| 6    | 120.86260000  | 6.36250000   |
| 7    | 174.46500000  | 9.45280000   |
| 8    | 193.74350000  | 1.88290000   |
| 9    | 233.14210000  | 4.72620000   |
| 10   | 252.12860000  | 8.62570000   |
| 11   | 267.57220000  | 1.38340000   |
| 12   | 272.18660000  | 7.25220000   |
| 13   | 288.60810000  | 2.72880000   |
| 14   | 307.91430000  | 10.28830000  |
| 15   | 340.57960000  | 8.92020000   |
| 16   | 343.69490000  | 6.47190000   |
| 17   | 371.28620000  | 5.75710000   |
| 18   | 391.51920000  | 3.56010000   |
| 19   | 439.46960000  | 2.75190000   |
| 20   | 452.44320000  | 0.45420000   |
| 21   | 483.02420000  | 0.10200000   |
| 22   | 504.68540000  | 1.30410000   |
| 23   | 567.71650000  | 2.95420000   |
| 24   | 608.35730000  | 84.01070000  |
| 25   | 653.72730000  | 3.09300000   |
| 26   | 690.12810000  | 9.04680000   |
| 27   | 711.95910000  | 1.48350000   |
| 28   | 746.76910000  | 0.80960000   |
| 29   | 773.72600000  | 8.19610000   |
| 30   | 798.34260000  | 19.90780000  |
| 31   | 834.84730000  | 20.34880000  |
| 32   | 861.80030000  | 6.90550000   |
| 33   | 938.11860000  | 47.69990000  |
| 34   | 941.17340000  | 28.02410000  |
| 35   | 976.86610000  | 12.82360000  |
| 36   | 998.20080000  | 39.03020000  |
| 37   | 1003.12810000 | 30.57350000  |
| 38   | 1018.99720000 | 7.90620000   |
| 39   | 1033.56090000 | 8.73370000   |
| 40   | 1040.73210000 | 13.60010000  |
| 41   | 1064.48290000 | 13.47070000  |
| 42   | 1083.83380000 | 0.64220000   |
| 43   | 1135.54870000 | 40.38240000  |
| 44   | 1147.26650000 | 3.31350000   |
| 45   | 1159.02800000 | 4.36900000   |
| 46   | 1218.65450000 | 5.31140000   |
| 47   | 1247.52930000 | 3.01090000   |
| 48   | 1259.04970000 | 22.82770000  |
| 49   | 1272.78670000 | 44.64620000  |
| 50   | 1297.80060000 | 36.95760000  |
| 51   | 1314.27990000 | 13.73380000  |
| 52   | 1316.47550000 | 1.14820000   |
| 53   | 1350.98150000 | 29.56300000  |
| 54   | 1372.50600000 | 13.43950000  |
| 55   | 1394.98570000 | 14.32220000  |
| 56   | 1434.86140000 | 7.67740000   |
| 57   | 1449.89270000 | 7.37230000   |
| 58   | 1455.35560000 | 20.98840000  |
| 59   | 1479.79610000 | 0.91570000   |
| 60   | 1491.35300000 | 77.66210000  |



|    |               |               |
|----|---------------|---------------|
| 61 | 1492.16860000 | 6.95740000    |
| 62 | 1498.03650000 | 5.14360000    |
| 63 | 1502.55660000 | 10.63850000   |
| 64 | 1510.92910000 | 1.66840000    |
| 65 | 1516.51830000 | 11.30160000   |
| 66 | 1522.30090000 | 143.49060000  |
| 67 | 1531.38550000 | 64.45760000   |
| 68 | 1546.72250000 | 117.50640000  |
| 69 | 1549.44170000 | 140.32160000  |
| 70 | 1650.15410000 | 49.72770000   |
| 71 | 1857.88850000 | 410.74570000  |
| 72 | 2742.56470000 | 5.87600000    |
| 73 | 2954.14260000 | 1868.66140000 |
| 74 | 3073.26600000 | 8.75080000    |
| 75 | 3093.33520000 | 2.56360000    |
| 76 | 3096.20990000 | 2.14060000    |
| 77 | 3099.53060000 | 8.20810000    |
| 78 | 3105.70890000 | 1.66900000    |
| 79 | 3146.81210000 | 5.71320000    |
| 80 | 3183.03860000 | 0.63180000    |
| 81 | 3188.34910000 | 1.25270000    |
| 82 | 3191.08720000 | 3.63050000    |
| 83 | 3208.42040000 | 2.77810000    |
| 84 | 3217.29630000 | 4.84070000    |
| 85 | 3231.38000000 | 9.00820000    |
| 86 | 3298.01630000 | 4.75710000    |
| 87 | 3682.10940000 | 128.59790000  |

S11. ERGOTHIONINE (1N $\epsilon$ +H)<sub>SH</sub> (THIOL; ISOMER C;  $\omega$ -B97X-D)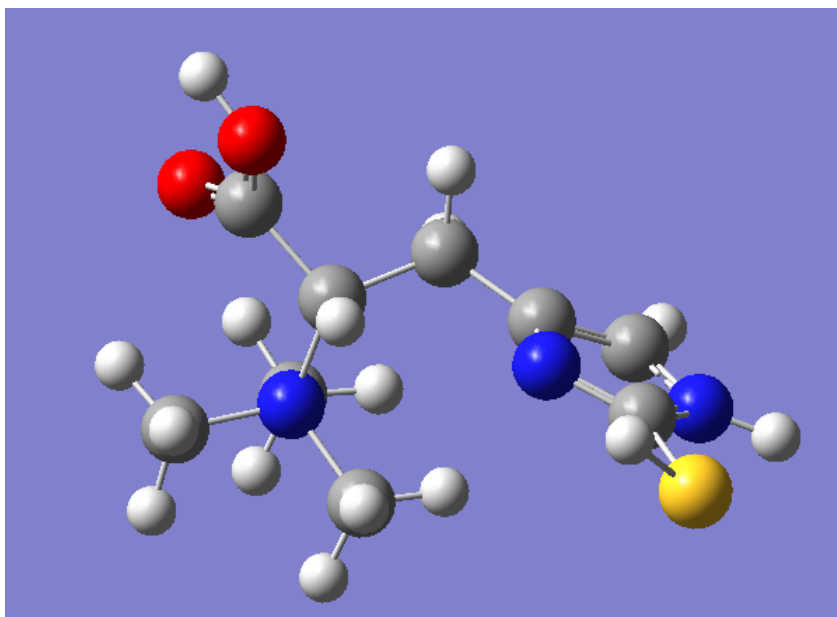

FIG. S3. Molecule

```

Route          : # opt freq wb97xd/cc-pvtz geom=connectivity int=ultrafine pop=regular
SMILES         : C[N](C)(C)C(Cc1c[nH]c(n1)S)C(=O)O
Formula        : C9H16N3O2S+
Charge         : 1
Multiplicity   : 1
Energy         : -1065.31452992
Gibbs Energy   : -1065.09723100
Number of imaginary frequencies : 0

```

a.u.  
a.u.

## S11.1. Cartesian Co-ordinates (XYZ format)

31

```

C  1.74659002 -0.04732800  1.93187201
C  0.92114902 -0.45226800  0.93023700
C  2.83110595 -0.15943301  0.02005100
N  2.97247601  0.13168600  1.33511305
H  1.59275496  0.10164500  2.98533106
N  1.60151196 -0.51046997 -0.26193699
S  4.17456722 -0.01260400 -1.09732997
C -0.51609701 -0.84911102  0.99113798
H -0.96950901 -0.57161897  1.94142997
H -0.57338399 -1.93862998  0.93646699
C -1.36067402 -0.35514900 -0.19415700
H -0.80234998 -0.55259800 -1.10761404
N -1.66418397  1.14146399 -0.22293900
C -2.64264393 -1.18436396 -0.21042500
O -3.67000198 -0.89252800  0.33521000
O -2.43452311 -2.31459498 -0.87215298
C -0.41288501  1.91152894 -0.52661300
H  0.28470001  1.80421805  0.29491800

```

|   |             |             |             |
|---|-------------|-------------|-------------|
| H | 0.03523300  | 1.52195299  | -1.43536496 |
| H | -0.68893403 | 2.95468092  | -0.65156299 |
| C | -2.22762609 | 1.65107501  | 1.06720400  |
| H | -3.10424209 | 1.06850302  | 1.32594204  |
| H | -1.46773195 | 1.57505405  | 1.83793199  |
| H | -2.49150991 | 2.69532609  | 0.92423600  |
| C | -2.63539791 | 1.42393100  | -1.33058202 |
| H | -2.72568703 | 2.50065899  | -1.43757999 |
| H | -2.24620891 | 0.99608099  | -2.25112700 |
| H | -3.60008502 | 0.99598998  | -1.08500600 |
| H | -3.22520089 | -2.86636090 | -0.80298901 |
| H | 3.61759806  | -0.81395400 | -2.01577592 |
| H | 3.83002496  | 0.37553301  | 1.79876494  |

**S11.2. Frequencies**

| Mode | IR frequency  | IR intensity |
|------|---------------|--------------|
| 1    | 22.48280000   | 1.26040000   |
| 2    | 48.29940000   | 3.38090000   |
| 3    | 61.11950000   | 1.99730000   |
| 4    | 69.97080000   | 2.33110000   |
| 5    | 97.23860000   | 0.93190000   |
| 6    | 113.51490000  | 20.32300000  |
| 7    | 179.83970000  | 0.62790000   |
| 8    | 188.44580000  | 19.13910000  |
| 9    | 227.31680000  | 3.32100000   |
| 10   | 237.95950000  | 3.28590000   |
| 11   | 270.52760000  | 0.90740000   |
| 12   | 279.46130000  | 1.25030000   |
| 13   | 305.78070000  | 0.71860000   |
| 14   | 315.92010000  | 0.78080000   |
| 15   | 328.08250000  | 4.40960000   |
| 16   | 360.21750000  | 6.90130000   |
| 17   | 373.01810000  | 7.70620000   |
| 18   | 397.30130000  | 5.83990000   |
| 19   | 441.55640000  | 1.21270000   |
| 20   | 447.94560000  | 1.74460000   |
| 21   | 479.95980000  | 0.13180000   |
| 22   | 499.29930000  | 1.64030000   |
| 23   | 574.86040000  | 14.81750000  |
| 24   | 588.45480000  | 71.10780000  |
| 25   | 625.43830000  | 74.16720000  |
| 26   | 663.21330000  | 28.71860000  |
| 27   | 675.40750000  | 48.85650000  |
| 28   | 713.19540000  | 8.15510000   |
| 29   | 736.73750000  | 8.99490000   |
| 30   | 766.38780000  | 5.29040000   |
| 31   | 797.35800000  | 26.34090000  |
| 32   | 813.05380000  | 16.68140000  |
| 33   | 888.03100000  | 20.05170000  |
| 34   | 924.47100000  | 10.68770000  |
| 35   | 933.23570000  | 28.33380000  |
| 36   | 980.53620000  | 25.12570000  |
| 37   | 997.03800000  | 18.10200000  |
| 38   | 1003.74430000 | 4.42970000   |
| 39   | 1027.85090000 | 10.76530000  |
| 40   | 1036.63730000 | 28.92860000  |
| 41   | 1073.17080000 | 1.15570000   |
| 42   | 1090.51620000 | 0.07400000   |
| 43   | 1127.61570000 | 31.14550000  |
| 44   | 1149.57490000 | 12.29060000  |
| 45   | 1158.21530000 | 11.62840000  |
| 46   | 1191.64790000 | 140.72450000 |
| 47   | 1213.58920000 | 47.67390000  |
| 48   | 1247.49680000 | 13.59140000  |
| 49   | 1267.05470000 | 21.33850000  |
| 50   | 1292.67660000 | 0.24740000   |
| 51   | 1306.33800000 | 0.94800000   |
| 52   | 1314.30020000 | 4.09710000   |
| 53   | 1321.59160000 | 1.11940000   |
| 54   | 1372.38830000 | 46.16020000  |
| 55   | 1386.33650000 | 33.97890000  |
| 56   | 1404.57040000 | 38.64590000  |
| 57   | 1452.34300000 | 19.61740000  |
| 58   | 1459.40200000 | 21.79490000  |
| 59   | 1463.01340000 | 8.22500000   |
| 60   | 1476.88680000 | 43.10560000  |

|    |               |              |
|----|---------------|--------------|
| 61 | 1479.08150000 | 5.76250000   |
| 62 | 1486.74680000 | 7.08440000   |
| 63 | 1499.10700000 | 19.83820000  |
| 64 | 1503.26760000 | 14.79670000  |
| 65 | 1513.02560000 | 9.79920000   |
| 66 | 1522.74110000 | 20.44510000  |
| 67 | 1529.57260000 | 15.16980000  |
| 68 | 1542.22920000 | 136.02860000 |
| 69 | 1546.50160000 | 56.25610000  |
| 70 | 1640.00490000 | 13.02540000  |
| 71 | 1858.49970000 | 282.70140000 |
| 72 | 2746.29170000 | 6.49250000   |
| 73 | 3070.66200000 | 4.56330000   |
| 74 | 3093.58150000 | 0.92250000   |
| 75 | 3096.54340000 | 2.44600000   |
| 76 | 3100.68600000 | 8.18460000   |
| 77 | 3123.52350000 | 5.62900000   |
| 78 | 3136.07720000 | 1.34650000   |
| 79 | 3185.47000000 | 0.73060000   |
| 80 | 3190.26940000 | 1.44140000   |
| 81 | 3195.25360000 | 1.78180000   |
| 82 | 3214.16030000 | 1.77160000   |
| 83 | 3216.00570000 | 1.24040000   |
| 84 | 3217.46090000 | 3.83480000   |
| 85 | 3292.32910000 | 3.22250000   |
| 86 | 3684.30210000 | 120.82460000 |
| 87 | 3795.83830000 | 164.32630000 |

S12. ERGOTHIONINE (1+H)<sub>s</sub> (THIONE; ISOMER A) IN MEOH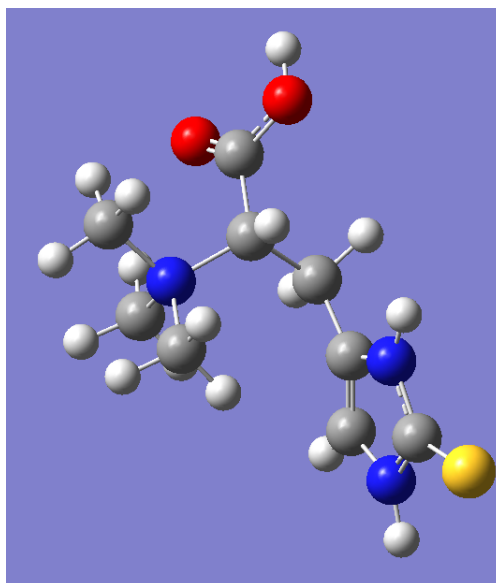

```

Route          : # opt freq b3lyp/cc-pvtz scrf=(solvent=methanol) geom=connectivity emp
                : iricaldispersion=gd3bj int=ultrafine pop=regular
SMILES         : C[N](C)(C)C(Cc1c[nH]c(=S)[nH]1)C(=O)O
Formula       : C9H16N3O2S+
Charge        : 1
Multiplicity   : 1
Energy        : -1065.69200440
Gibbs Energy   : -1065.47299100
Number of imaginary frequencies : 0

```

a.u.

a.u.

## S12.1. Cartesian Co-ordinates (XYZ format)

31

```

C  1.67734504  0.27213901  1.72266102
C  0.93941700 -0.44834200  0.84693402
C  3.06022692 -0.32745901  0.03324900
N  2.96062112  0.34002101  1.21243095
H  1.40253401  0.73387200  2.65205407
N  1.80453396 -0.80809897 -0.18105701
S  4.42213392 -0.52221102 -0.94193602
C -0.48903799 -0.85186100  0.89861798
H -0.90622503 -0.56134701  1.85944295
H -0.54977500 -1.94164801  0.85933799
C -1.41113400 -0.36568099 -0.24457701
H -0.99581897 -0.64600003 -1.20726001
N -1.63371003  1.14553499 -0.33694300
C -2.72951388 -1.11765099 -0.05958400
O -3.62653494 -0.77802497  0.66772801
O -2.70623112 -2.24518108 -0.76744699
C -0.40095600  1.80012596 -0.90649903
H  0.42480499  1.66882706 -0.22130300
H -0.17851700  1.35087502 -1.86806905
H -0.61624497  2.85595798 -1.02804005

```

```

C -1.94659305 1.77692401 0.99189001
H -2.79836297 1.27070200 1.42725801
H -1.07749796 1.70125401 1.63323295
H -2.17334294 2.82194996 0.81040603
C -2.76669097 1.42634499 -1.29361200
H -2.79700303 2.49625397 -1.46439695
H -2.57277107 0.90704298 -2.22674203
H -3.69730496 1.09433103 -0.85299599
H -3.50774407 -2.75871611 -0.57323998
H 3.74141097 0.80729699 1.64112401
H 1.58368003 -1.38242400 -0.97720802

```

## S12.2. Frequencies

| Mode | IR frequency  | IR intensity |
|------|---------------|--------------|
| 1    | 23.32660000   | 8.77510000   |
| 2    | 39.90990000   | 9.86320000   |
| 3    | 58.91860000   | 0.74140000   |
| 4    | 79.66510000   | 5.77450000   |
| 5    | 98.92820000   | 1.70670000   |
| 6    | 164.09240000  | 2.47890000   |
| 7    | 172.95770000  | 3.73270000   |
| 8    | 212.25690000  | 2.12670000   |
| 9    | 238.67330000  | 1.52420000   |
| 10   | 257.33550000  | 1.63050000   |
| 11   | 272.63370000  | 0.59100000   |
| 12   | 284.82960000  | 0.21910000   |
| 13   | 305.04380000  | 3.40630000   |
| 14   | 324.92270000  | 2.41320000   |
| 15   | 342.48390000  | 8.11620000   |
| 16   | 350.44650000  | 4.14210000   |
| 17   | 395.50450000  | 1.42660000   |
| 18   | 418.98330000  | 1.50710000   |
| 19   | 432.88120000  | 1.35600000   |
| 20   | 474.31610000  | 6.91720000   |
| 21   | 507.01610000  | 37.94420000  |
| 22   | 554.07790000  | 9.88930000   |
| 23   | 568.64040000  | 12.94580000  |
| 24   | 595.46740000  | 137.67370000 |
| 25   | 616.04630000  | 175.87650000 |
| 26   | 650.48760000  | 71.64680000  |
| 27   | 658.65820000  | 67.64190000  |
| 28   | 692.06680000  | 19.48840000  |
| 29   | 713.66400000  | 13.22120000  |
| 30   | 746.80240000  | 2.76250000   |
| 31   | 805.55440000  | 15.59470000  |
| 32   | 811.77120000  | 71.17430000  |
| 33   | 856.96890000  | 24.82990000  |
| 34   | 913.57930000  | 28.15310000  |
| 35   | 939.99320000  | 39.23590000  |
| 36   | 968.95540000  | 30.10420000  |
| 37   | 995.43180000  | 5.02810000   |
| 38   | 1009.66950000 | 34.55440000  |
| 39   | 1018.70840000 | 30.98490000  |
| 40   | 1049.79400000 | 0.88850000   |
| 41   | 1083.46350000 | 0.11650000   |
| 42   | 1107.28240000 | 72.50660000  |
| 43   | 1138.57800000 | 86.01020000  |
| 44   | 1151.72970000 | 36.81440000  |
| 45   | 1164.05810000 | 198.51900000 |
| 46   | 1187.22020000 | 210.53040000 |
| 47   | 1222.20830000 | 10.81340000  |

|    |               |              |
|----|---------------|--------------|
| 48 | 1259.14720000 | 15.15630000  |
| 49 | 1263.60350000 | 3.03060000   |
| 50 | 1278.41520000 | 10.81300000  |
| 51 | 1289.63740000 | 25.99310000  |
| 52 | 1297.12310000 | 2.16950000   |
| 53 | 1315.91270000 | 13.26500000  |
| 54 | 1369.60950000 | 74.75460000  |
| 55 | 1388.09270000 | 57.66390000  |
| 56 | 1407.67800000 | 11.26280000  |
| 57 | 1426.69580000 | 70.50430000  |
| 58 | 1437.69270000 | 15.48220000  |
| 59 | 1450.12930000 | 13.59120000  |
| 60 | 1455.22220000 | 2.55810000   |
| 61 | 1472.54590000 | 36.95010000  |
| 62 | 1484.51950000 | 6.42720000   |
| 63 | 1493.54730000 | 63.83500000  |
| 64 | 1495.24420000 | 58.76290000  |
| 65 | 1497.29590000 | 2.40850000   |
| 66 | 1506.14680000 | 414.65350000 |
| 67 | 1510.40510000 | 208.76400000 |
| 68 | 1515.81640000 | 52.48410000  |
| 69 | 1531.78090000 | 64.43780000  |
| 70 | 1673.73400000 | 51.77200000  |
| 71 | 1796.90490000 | 473.68460000 |
| 72 | 3046.74500000 | 8.13150000   |
| 73 | 3091.22630000 | 2.03140000   |
| 74 | 3096.00670000 | 6.95410000   |
| 75 | 3099.46370000 | 8.87400000   |
| 76 | 3114.86600000 | 0.44640000   |
| 77 | 3129.00440000 | 1.77410000   |
| 78 | 3176.97940000 | 0.71240000   |
| 79 | 3182.38130000 | 4.27640000   |
| 80 | 3184.84310000 | 3.75010000   |
| 81 | 3203.74330000 | 0.55510000   |
| 82 | 3206.59100000 | 2.77850000   |
| 83 | 3210.48570000 | 3.43030000   |
| 84 | 3289.88340000 | 10.03990000  |
| 85 | 3644.34000000 | 189.28100000 |
| 86 | 3650.95050000 | 132.46840000 |
| 87 | 3709.08410000 | 183.37470000 |



S13. ERGOTHIONINE (1N $\epsilon$ +H)<sub>SH</sub> (THIOL; ISOMER B) IN MEOH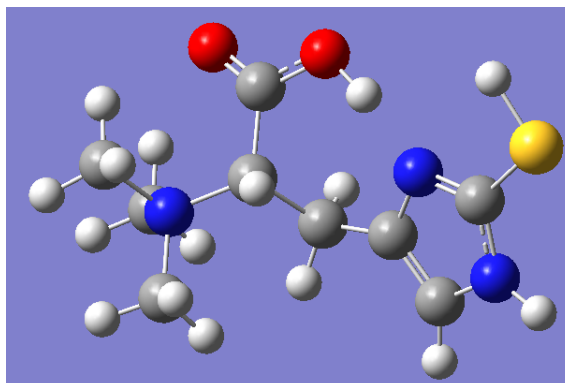

```

Route : # opt freq b3lyp/cc-pvtz scrf=(solvent=methanol) geom=connectivity emp
       : iricaldispersion=gd3bj int=ultrafine pop=regular
SMILES : C[N](C)(C)C(Cc1c[nH]c(n1)S)C(=O)O
Formula : C9H16N3O2S+
Charge : 1
Multiplicity : 1
Energy : -1065.68262465 a.u.
Gibbs Energy : -1065.46748400 a.u.
Number of imaginary frequencies : 0

```

## S13.1. Cartesian Co-ordinates (XYZ format)

31

```

C 1.77723598 -1.96489501 -0.61329401
C 0.94777000 -0.88576102 -0.62099200
C 2.88488603 -0.15941601 0.03502300
N 3.00629306 -1.48624802 -0.19991900
H 1.61894095 -2.99934912 -0.85341698
N 1.65008795 0.23476800 -0.21145400
S 4.22656918 0.82625502 0.59155601
C -0.49940401 -0.77987701 -0.97501701
H -0.91011900 -1.78213000 -1.02541196
H -0.62120998 -0.34825000 -1.96917605
C -1.26206994 0.08879000 0.05999100
H -0.72545898 0.05949500 1.00523198
N -2.64599800 -0.45826900 0.40594599
C -1.28849304 1.55621397 -0.41307899
O -2.29791498 2.13948894 -0.73884100
O -0.10687200 2.12928391 -0.45776799
C -2.48522496 -1.80274999 1.06499302
H -2.05934095 -2.51296806 0.36888799
H -1.84249103 -1.69200599 1.93220901
H -3.46963692 -2.14080405 1.36859906
C -3.52951097 -0.60689998 -0.80224299
H -3.65678310 0.36682400 -1.25526404
H -3.06862211 -1.29926705 -1.49707401
H -4.48134804 -1.00467896 -0.46703100
C -3.32266212 0.43907899 1.41358399
H -4.23737001 -0.05092200 1.72806096
H -2.65753698 0.56346798 2.26219392

```

H -3.53813791 1.39012897 0.94952297  
 H 3.50047493 1.95560801 0.64227200  
 H 0.67496598 1.49088395 -0.26792100  
 H 3.84249997 -2.03507495 -0.08435900

### S13.2. Frequencies

| Mode | IR frequency  | IR intensity |
|------|---------------|--------------|
| 1    | 36.38580000   | 1.50910000   |
| 2    | 53.69690000   | 1.49760000   |
| 3    | 92.77390000   | 4.76690000   |
| 4    | 99.93550000   | 20.82400000  |
| 5    | 108.87200000  | 10.18700000  |
| 6    | 122.24240000  | 3.51190000   |
| 7    | 170.38110000  | 12.67480000  |
| 8    | 199.15420000  | 4.06030000   |
| 9    | 228.45580000  | 6.07250000   |
| 10   | 251.43370000  | 19.42710000  |
| 11   | 259.37280000  | 15.55290000  |
| 12   | 260.74440000  | 1.36700000   |
| 13   | 281.79000000  | 4.20570000   |
| 14   | 306.36670000  | 15.82900000  |
| 15   | 329.31890000  | 7.13120000   |
| 16   | 337.84610000  | 18.13820000  |
| 17   | 367.47570000  | 11.63080000  |
| 18   | 387.35120000  | 8.10070000   |
| 19   | 429.12340000  | 2.92410000   |
| 20   | 440.15860000  | 2.43660000   |
| 21   | 472.75070000  | 2.59600000   |
| 22   | 495.57830000  | 2.01930000   |
| 23   | 559.86120000  | 6.70720000   |
| 24   | 576.27920000  | 131.09200000 |
| 25   | 646.76780000  | 4.30680000   |
| 26   | 676.96160000  | 17.78710000  |
| 27   | 700.87250000  | 1.56660000   |
| 28   | 737.48800000  | 1.41000000   |
| 29   | 764.16780000  | 15.00750000  |
| 30   | 784.46030000  | 30.99300000  |
| 31   | 815.00240000  | 33.63050000  |
| 32   | 855.71350000  | 12.80620000  |
| 33   | 914.39850000  | 61.32640000  |
| 34   | 926.25510000  | 43.26860000  |
| 35   | 944.76680000  | 29.95540000  |
| 36   | 974.74170000  | 29.87510000  |
| 37   | 1005.88520000 | 16.17330000  |
| 38   | 1019.89760000 | 23.08570000  |
| 39   | 1030.17920000 | 33.74220000  |
| 40   | 1039.51810000 | 16.18240000  |
| 41   | 1053.10960000 | 83.54170000  |
| 42   | 1080.46770000 | 0.31850000   |
| 43   | 1114.91830000 | 73.15370000  |
| 44   | 1144.10030000 | 7.02580000   |
| 45   | 1153.14700000 | 4.21970000   |
| 46   | 1210.82230000 | 13.29880000  |
| 47   | 1237.81680000 | 105.25800000 |
| 48   | 1243.25840000 | 35.12080000  |
| 49   | 1254.08470000 | 98.14110000  |
| 50   | 1276.18350000 | 81.57200000  |
| 51   | 1297.04310000 | 1.58730000   |
| 52   | 1299.80500000 | 10.16110000  |
| 53   | 1330.90850000 | 13.40190000  |
| 54   | 1353.38980000 | 40.02570000  |

|    |               |               |
|----|---------------|---------------|
| 55 | 1371.77730000 | 26.60860000   |
| 56 | 1421.15520000 | 18.97410000   |
| 57 | 1444.71390000 | 7.35920000    |
| 58 | 1449.75300000 | 32.80550000   |
| 59 | 1456.94680000 | 134.35670000  |
| 60 | 1476.98760000 | 2.90090000    |
| 61 | 1486.94360000 | 23.60960000   |
| 62 | 1488.48540000 | 5.39620000    |
| 63 | 1493.03710000 | 11.71310000   |
| 64 | 1501.94140000 | 9.10150000    |
| 65 | 1505.75530000 | 27.67830000   |
| 66 | 1512.78640000 | 138.88820000  |
| 67 | 1522.97350000 | 36.97440000   |
| 68 | 1527.22960000 | 460.76330000  |
| 69 | 1533.29170000 | 17.33830000   |
| 70 | 1623.88230000 | 95.18250000   |
| 71 | 1779.69490000 | 679.24800000  |
| 72 | 2575.31670000 | 3346.01990000 |
| 73 | 2696.24750000 | 6.48800000    |
| 74 | 3054.49800000 | 15.14540000   |
| 75 | 3090.79740000 | 10.33160000   |
| 76 | 3093.74000000 | 2.22640000    |
| 77 | 3097.89570000 | 9.66350000    |
| 78 | 3102.77310000 | 1.64140000    |
| 79 | 3143.12900000 | 6.37870000    |
| 80 | 3173.84930000 | 2.85180000    |
| 81 | 3178.79070000 | 1.43010000    |
| 82 | 3180.51050000 | 7.82190000    |
| 83 | 3201.76910000 | 4.34070000    |
| 84 | 3208.07450000 | 1.85560000    |
| 85 | 3220.67200000 | 4.17820000    |
| 86 | 3284.64130000 | 4.32950000    |
| 87 | 3635.71000000 | 167.06360000  |

S14. ERGOTHIONINE (1N $\epsilon$ +H)<sub>SH</sub> (THIOL; ISOMER C) IN MEOH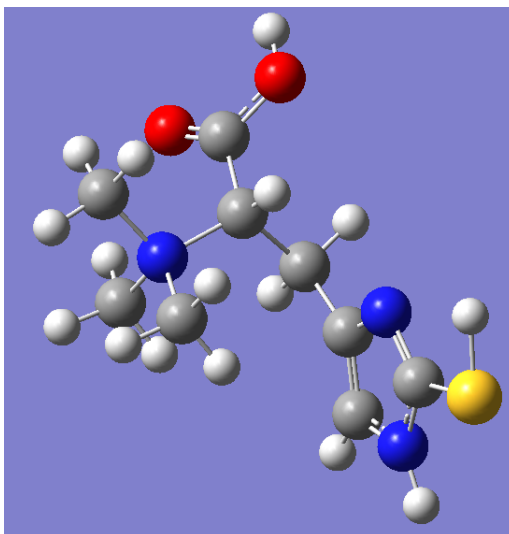

```

Route : # opt freq b3lyp/cc-pvtz scrf=(solvent=methanol) geom=connectivity emp
       : iricaldispersion=gd3bj int=ultrafine pop=regular
SMILES : C[N](C)(C)C(Cc1c[nH]c(n1)S)C(=O)O
Formula : C9H16N3O2S+
Charge : 1
Multiplicity : 1
Energy : -1065.67427588 a.u.
Gibbs Energy : -1065.46237700 a.u.
Number of imaginary frequencies : 0

```

## S14.1. Cartesian Co-ordinates (XYZ format)

31

```

C 1.68234801 0.05719300 1.90265405
C 0.91625398 -0.49878800 0.91950703
C 2.87178397 -0.23481300 0.06559600
N 2.93457198 0.22029001 1.34438896
H 1.46521401 0.34527901 2.91444397
N 1.66850495 -0.67878199 -0.22711299
S 4.27105522 -0.19420700 -1.00267506
C -0.51906699 -0.89649898 0.96001202
H -0.97103798 -0.62921500 1.91218996
H -0.58530003 -1.98399198 0.88622302
C -1.36697400 -0.37140399 -0.21595800
H -0.82794303 -0.55633599 -1.14020801
N -1.65114701 1.13353896 -0.21386200
C -2.65474105 -1.18833899 -0.23145700
O -3.66562295 -0.92456400 0.36867300
O -2.47552800 -2.29183197 -0.95883501
C -0.39072600 1.88887298 -0.54964399
H 0.33929399 1.72942197 0.23148000
H -0.01116700 1.53243399 -1.50058401
H -0.64859098 2.94026303 -0.61409301
C -2.16811609 1.63402498 1.10652494
H -3.03998303 1.05543697 1.38225198

```

H -1.38586199 1.54071105 1.85023201  
 H -2.42681503 2.67983294 0.97916502  
 C -2.65613103 1.44901800 -1.29184496  
 H -2.72532296 2.52751994 -1.37833703  
 H -2.30326104 1.02335000 -2.22579598  
 H -3.61748290 1.03589594 -1.01692295  
 H -3.26867199 -2.84752393 -0.88662899  
 H 3.61677003 -0.76970798 -2.02512598  
 H 3.74252796 0.60123599 1.80843103

#### S14.2. Frequencies

| Mode | IR frequency  | IR intensity |
|------|---------------|--------------|
| 1    | 6.67270000    | 1.62130000   |
| 2    | 33.99080000   | 5.15880000   |
| 3    | 52.10500000   | 3.26330000   |
| 4    | 71.00450000   | 3.99500000   |
| 5    | 85.50940000   | 1.00600000   |
| 6    | 115.52170000  | 34.44910000  |
| 7    | 173.83300000  | 1.06310000   |
| 8    | 178.33560000  | 26.15980000  |
| 9    | 206.14450000  | 4.64700000   |
| 10   | 229.05840000  | 4.35160000   |
| 11   | 259.46600000  | 2.39100000   |
| 12   | 271.31960000  | 0.60720000   |
| 13   | 295.04900000  | 2.65800000   |
| 14   | 300.27530000  | 0.99480000   |
| 15   | 317.39510000  | 4.76110000   |
| 16   | 343.07600000  | 7.68300000   |
| 17   | 361.44420000  | 10.66320000  |
| 18   | 387.86290000  | 13.87040000  |
| 19   | 425.13320000  | 1.35180000   |
| 20   | 433.36540000  | 2.69660000   |
| 21   | 469.96440000  | 1.87480000   |
| 22   | 481.40020000  | 2.76420000   |
| 23   | 552.86170000  | 132.08380000 |
| 24   | 561.10390000  | 7.36350000   |
| 25   | 593.38780000  | 139.90720000 |
| 26   | 656.05030000  | 28.90700000  |
| 27   | 659.85260000  | 56.50580000  |
| 28   | 699.11180000  | 11.80980000  |
| 29   | 723.22230000  | 8.00370000   |
| 30   | 751.77060000  | 8.13130000   |
| 31   | 781.52330000  | 40.09670000  |
| 32   | 802.01230000  | 17.34780000  |
| 33   | 860.54970000  | 31.01350000  |
| 34   | 903.51660000  | 18.81290000  |
| 35   | 914.91380000  | 43.18170000  |
| 36   | 945.85030000  | 37.06220000  |
| 37   | 969.25450000  | 28.47110000  |
| 38   | 995.36170000  | 8.57850000   |
| 39   | 1010.57180000 | 58.47950000  |
| 40   | 1021.18250000 | 13.46410000  |
| 41   | 1051.37450000 | 1.95400000   |
| 42   | 1082.88940000 | 0.20220000   |
| 43   | 1105.66620000 | 53.63120000  |
| 44   | 1136.81730000 | 99.44920000  |
| 45   | 1145.75860000 | 71.17020000  |
| 46   | 1161.97860000 | 156.88480000 |
| 47   | 1199.22040000 | 18.28220000  |
| 48   | 1235.52150000 | 26.26790000  |
| 49   | 1256.35560000 | 16.83690000  |

|    |               |              |
|----|---------------|--------------|
| 50 | 1275.95940000 | 3.99140000   |
| 51 | 1291.55840000 | 12.40510000  |
| 52 | 1295.71530000 | 2.11020000   |
| 53 | 1302.40530000 | 7.23560000   |
| 54 | 1340.43290000 | 69.27420000  |
| 55 | 1358.18780000 | 71.09560000  |
| 56 | 1385.35570000 | 33.80040000  |
| 57 | 1430.96100000 | 24.16600000  |
| 58 | 1440.80420000 | 69.23700000  |
| 59 | 1448.33160000 | 21.83190000  |
| 60 | 1453.02290000 | 0.90480000   |
| 61 | 1469.78260000 | 18.99180000  |
| 62 | 1481.20570000 | 4.37730000   |
| 63 | 1491.17620000 | 29.20600000  |
| 64 | 1493.48420000 | 10.95020000  |
| 65 | 1498.08790000 | 5.37120000   |
| 66 | 1506.79790000 | 171.02830000 |
| 67 | 1509.40820000 | 25.92380000  |
| 68 | 1514.60160000 | 31.31140000  |
| 69 | 1531.03740000 | 79.77860000  |
| 70 | 1610.97790000 | 14.37520000  |
| 71 | 1792.46330000 | 477.79280000 |
| 72 | 2694.99630000 | 5.32770000   |
| 73 | 3046.44910000 | 11.78740000  |
| 74 | 3087.94820000 | 0.48500000   |
| 75 | 3089.45860000 | 8.10020000   |
| 76 | 3096.83030000 | 11.72750000  |
| 77 | 3111.74070000 | 6.71800000   |
| 78 | 3127.43220000 | 1.87390000   |
| 79 | 3174.16190000 | 0.40540000   |
| 80 | 3176.06210000 | 3.24540000   |
| 81 | 3181.73930000 | 7.04120000   |
| 82 | 3200.13830000 | 0.36240000   |
| 83 | 3204.26060000 | 4.99310000   |
| 84 | 3206.58280000 | 1.26440000   |
| 85 | 3277.30970000 | 1.98760000   |
| 86 | 3638.46930000 | 154.04730000 |
| 87 | 3713.98600000 | 171.64060000 |

S15. ERGOTHIONINE (1+H)<sub>S</sub> (THIONE; ISOMER A2) IN MEOH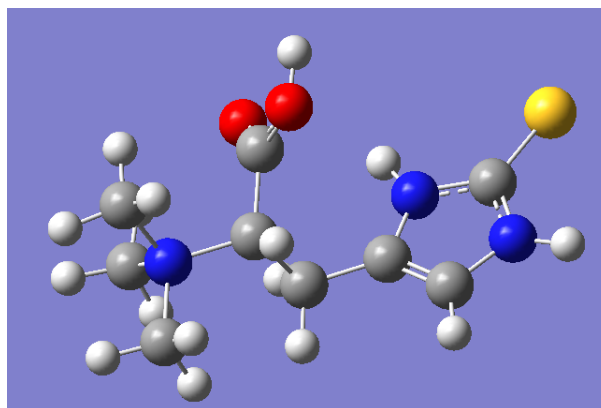

```

Route : # opt freq b3lyp/cc-pvtz scrf=(solvent=methanol) geom=connectivity emp
       : iricdispersion=gd3bj int=ultrafine pop=regular
SMILES : C[N](C)(C)C(Cc1c[nH]c(=S)[nH]1)C(=O)O
Formula : C9H16N3O2S+
Charge : 1
Multiplicity : 1
Energy : -1065.69293219 a.u.
Gibbs Energy : -1065.47507400 a.u.
Number of imaginary frequencies : 0

```

## S15.1. Cartesian Co-ordinates (XYZ format)

31

```

C 1.58926594 1.91456103 -0.52852499
C 0.88791603 1.07364202 0.26488400
C 3.02632308 0.30695400 0.16197000
N 2.88495994 1.43548298 -0.58086598
H 3.64781189 1.85277498 -1.08637595
H 1.27984202 2.79896808 -1.05227697
N 1.78648198 0.09279500 0.67621601
S 4.41970110 -0.61728102 0.39823100
C -0.55199802 1.07087004 0.64658898
H -0.91987997 2.09106898 0.59230101
H -0.65597802 0.72816700 1.67376304
C -1.37124896 0.17244799 -0.29599500
H -1.29772604 0.54552799 -1.31206501
N -2.87153292 0.16480200 0.01460200
C -0.80878597 -1.25061405 -0.25601199
O -0.40818301 -1.64341295 -1.46087098
O -0.70369202 -1.90058100 0.75389600
C -3.44441795 1.51487303 -0.32189101
H -3.00178599 2.26673007 0.31898299
H -3.23881197 1.73119104 -1.36489403
H -4.51441479 1.47467101 -0.15063700
C -3.17629790 -0.15363801 1.45420396
H -2.68968606 -1.08380699 1.71948504
H -2.82452893 0.65599501 2.08180499
H -4.25293398 -0.24600200 1.54664195
C -3.54569101 -0.85779899 -0.86134797

```

H -4.61729717 -0.75869900 -0.73079097  
H -3.27521205 -0.66913801 -1.89446604  
H -3.23183608 -1.85034001 -0.55721003  
H 1.58333600 -0.67589700 1.29381800  
H -0.01303600 -2.52908492 -1.39406300

### S15.2. Frequencies

| Mode | IR frequency  | IR intensity |
|------|---------------|--------------|
| 1    | 19.17870000   | 1.12830000   |
| 2    | 34.67190000   | 7.05010000   |
| 3    | 45.05830000   | 0.35360000   |
| 4    | 65.60720000   | 1.27660000   |
| 5    | 81.14020000   | 0.90460000   |
| 6    | 161.58650000  | 6.85710000   |
| 7    | 178.76640000  | 1.02230000   |
| 8    | 196.77520000  | 2.94800000   |
| 9    | 212.09080000  | 1.31890000   |
| 10   | 236.09610000  | 3.96560000   |
| 11   | 255.50710000  | 0.88840000   |
| 12   | 283.88320000  | 3.92030000   |
| 13   | 289.88460000  | 0.46690000   |
| 14   | 321.28180000  | 1.22820000   |
| 15   | 341.77450000  | 5.68830000   |
| 16   | 346.28940000  | 2.74620000   |
| 17   | 394.42610000  | 3.78990000   |
| 18   | 428.58460000  | 1.43060000   |
| 19   | 438.50800000  | 4.34070000   |
| 20   | 463.41610000  | 0.77160000   |
| 21   | 510.37120000  | 45.69880000  |
| 22   | 540.33110000  | 13.47220000  |
| 23   | 569.38480000  | 8.10630000   |
| 24   | 621.97230000  | 246.21820000 |
| 25   | 625.93780000  | 47.05410000  |
| 26   | 655.70630000  | 102.10030000 |
| 27   | 663.95070000  | 6.99680000   |
| 28   | 699.22300000  | 16.61960000  |
| 29   | 717.54110000  | 49.24000000  |
| 30   | 748.76150000  | 50.04920000  |
| 31   | 803.26680000  | 33.95570000  |
| 32   | 817.85060000  | 28.62090000  |
| 33   | 835.46550000  | 33.52740000  |
| 34   | 916.56420000  | 24.55640000  |
| 35   | 955.26410000  | 30.98070000  |
| 36   | 969.80750000  | 24.61380000  |
| 37   | 994.88770000  | 5.69270000   |
| 38   | 1002.65720000 | 18.93790000  |
| 39   | 1032.75280000 | 1.05720000   |
| 40   | 1059.22390000 | 3.39630000   |
| 41   | 1082.56160000 | 0.06910000   |
| 42   | 1106.56090000 | 62.73140000  |
| 43   | 1141.03120000 | 48.90680000  |
| 44   | 1156.76200000 | 15.44490000  |
| 45   | 1164.74770000 | 251.17280000 |
| 46   | 1182.45910000 | 146.10070000 |
| 47   | 1209.37250000 | 36.75980000  |
| 48   | 1247.93490000 | 4.77640000   |
| 49   | 1267.46400000 | 4.63940000   |
| 50   | 1269.56750000 | 23.02210000  |
| 51   | 1291.83720000 | 10.00160000  |
| 52   | 1299.02600000 | 25.25620000  |
| 53   | 1324.59320000 | 18.34280000  |



|    |               |              |
|----|---------------|--------------|
| 54 | 1362.03430000 | 5.48860000   |
| 55 | 1386.59740000 | 16.08290000  |
| 56 | 1402.86950000 | 34.03080000  |
| 57 | 1433.17940000 | 9.17520000   |
| 58 | 1438.98830000 | 29.04090000  |
| 59 | 1453.78280000 | 4.58490000   |
| 60 | 1457.01130000 | 12.82600000  |
| 61 | 1479.23100000 | 1.58570000   |
| 62 | 1484.29410000 | 43.21060000  |
| 63 | 1485.91800000 | 4.97350000   |
| 64 | 1493.64080000 | 34.38160000  |
| 65 | 1497.88020000 | 11.79530000  |
| 66 | 1505.09860000 | 669.33000000 |
| 67 | 1511.39000000 | 36.23410000  |
| 68 | 1514.29290000 | 44.79850000  |
| 69 | 1525.85110000 | 71.45260000  |
| 70 | 1671.68910000 | 71.87880000  |
| 71 | 1789.13980000 | 405.75220000 |
| 72 | 3084.73710000 | 5.65770000   |
| 73 | 3088.36110000 | 3.62780000   |
| 74 | 3094.43210000 | 2.69130000   |
| 75 | 3100.52780000 | 6.40630000   |
| 76 | 3131.58980000 | 0.32140000   |
| 77 | 3143.31960000 | 1.72600000   |
| 78 | 3180.11430000 | 0.60620000   |
| 79 | 3182.38320000 | 2.47940000   |
| 80 | 3184.80630000 | 3.09680000   |
| 81 | 3188.09820000 | 1.79320000   |
| 82 | 3195.89890000 | 2.33780000   |
| 83 | 3204.40040000 | 2.06310000   |
| 84 | 3288.64780000 | 8.45090000   |
| 85 | 3637.27550000 | 179.77330000 |
| 86 | 3651.76520000 | 150.21830000 |
| 87 | 3701.55620000 | 165.05550000 |

S16. ERGOTHIONINE (1N $\epsilon$ +H)<sub>SH</sub> (THIOL; ZWITTERION) IN MEOH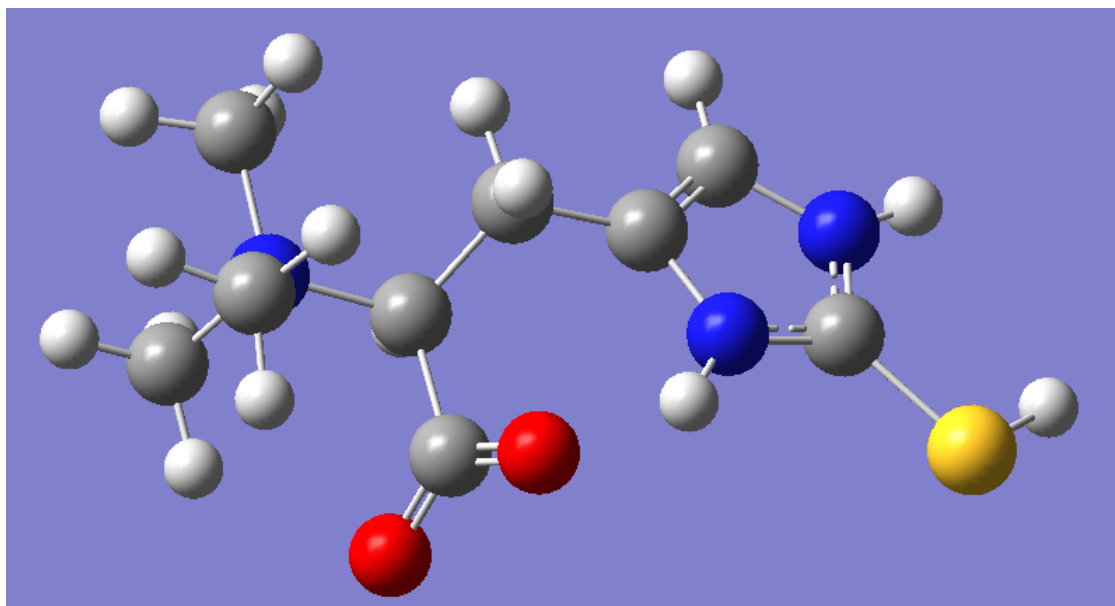

FIG. S4. Molecule

```

Route : # opt freq b3lyp/cc-pvtz scrf=(solvent=methanol) geom=connectivity emp
       : iricaldispersion=gd3bj int=ultrafine pop=regular
SMILES : C[N+](C)(C)C(Cc1c[nH+]c([nH]1)S)C(=O)[O-]
Formula : C9H16N3O2S+
Charge : 1
Multiplicity : 1
Energy : -1065.67674224 a.u.
Gibbs Energy : -1065.46230200 a.u.
Number of imaginary frequencies : 0

```

## S16.1. Cartesian Co-ordinates (XYZ format)

31

```

C 1.68834901 1.99233603 -0.55695701
C 0.91517299 1.10114801 0.11189300
C 2.99925208 0.30960599 0.08850200
N 2.97660208 1.48407304 -0.55596101
H 3.77802801 1.93322897 -0.96909702
H 1.45121598 2.93122792 -1.01905501
N 1.75664699 0.07252100 0.50324702
S 4.34872007 -0.75056899 0.38022599
C -0.53183597 1.12868798 0.46769601
H -0.89300102 2.11113095 0.18124300
H -0.62799001 1.03237796 1.54833102
C -1.33702004 0.02682900 -0.23095600
H -1.23564506 0.13162100 -1.30814803
N -2.85416698 0.17636199 0.02651000
C -0.88507599 -1.43106198 0.16817699
O -1.27117503 -2.34364605 -0.57458502
O -0.17559101 -1.52484000 1.20482695

```

C -3.29873610 1.60650301 -0.08741400  
H -2.92441702 2.17840505 0.75243598  
H -2.93641496 2.01512599 -1.02490199  
H -4.38346481 1.61634803 -0.07472300  
C -3.22303295 -0.33343399 1.38934803  
H -3.03280091 -1.39937603 1.42950296  
H -2.63183594 0.18281101 2.13679004  
H -4.27793121 -0.13654600 1.54902196  
C -3.61546206 -0.60753798 -1.01098800  
H -4.67072010 -0.54272300 -0.76766998  
H -3.42595196 -0.15784000 -1.98037302  
H -3.26162505 -1.62942803 -0.99649298  
H 1.34310400 -0.76054901 0.95618403  
H 5.21700287 -0.05033200 -0.37130600

**S16.2. Frequencies**

| Mode | IR frequency  | IR intensity |
|------|---------------|--------------|
| 1    | 14.48480000   | 6.93150000   |
| 2    | 42.85520000   | 1.27210000   |
| 3    | 60.33660000   | 11.33640000  |
| 4    | 79.35020000   | 2.90940000   |
| 5    | 106.80560000  | 28.34520000  |
| 6    | 126.26380000  | 5.44390000   |
| 7    | 180.56270000  | 9.14440000   |
| 8    | 203.41540000  | 7.94510000   |
| 9    | 235.29690000  | 31.71310000  |
| 10   | 242.68380000  | 28.02450000  |
| 11   | 261.24240000  | 23.71500000  |
| 12   | 273.63050000  | 21.34300000  |
| 13   | 286.06200000  | 7.96920000   |
| 14   | 323.06580000  | 4.23810000   |
| 15   | 325.62900000  | 3.35320000   |
| 16   | 347.84390000  | 0.60710000   |
| 17   | 362.26750000  | 15.31830000  |
| 18   | 385.02410000  | 16.74870000  |
| 19   | 431.44500000  | 1.05860000   |
| 20   | 438.52930000  | 4.14200000   |
| 21   | 483.74580000  | 8.29270000   |
| 22   | 521.60120000  | 1.34590000   |
| 23   | 544.69730000  | 12.53180000  |
| 24   | 624.86640000  | 116.54410000 |
| 25   | 627.26780000  | 13.06250000  |
| 26   | 656.81420000  | 0.78770000   |
| 27   | 697.87620000  | 1.66600000   |
| 28   | 719.26550000  | 3.68540000   |
| 29   | 762.49830000  | 61.47010000  |
| 30   | 805.51480000  | 17.98510000  |
| 31   | 826.83410000  | 55.41360000  |
| 32   | 835.43540000  | 39.23080000  |
| 33   | 907.40770000  | 84.21000000  |
| 34   | 910.02440000  | 231.64640000 |
| 35   | 955.56700000  | 47.42070000  |
| 36   | 958.34720000  | 30.27920000  |
| 37   | 965.77470000  | 4.22300000   |
| 38   | 992.98540000  | 16.10020000  |
| 39   | 999.75070000  | 75.33680000  |
| 40   | 1044.18690000 | 2.45980000   |
| 41   | 1078.85600000 | 9.24710000   |
| 42   | 1086.12490000 | 0.29910000   |
| 43   | 1113.43590000 | 28.85770000  |
| 44   | 1144.28630000 | 3.58370000   |
| 45   | 1158.10540000 | 3.79500000   |
| 46   | 1193.57780000 | 165.64300000 |
| 47   | 1211.29750000 | 12.94430000  |
| 48   | 1247.20360000 | 1.45400000   |
| 49   | 1268.20430000 | 0.69310000   |
| 50   | 1288.32540000 | 48.75500000  |
| 51   | 1288.79080000 | 20.31240000  |
| 52   | 1314.10770000 | 30.20570000  |
| 53   | 1336.51780000 | 159.91350000 |
| 54   | 1353.38710000 | 18.22750000  |
| 55   | 1378.44870000 | 104.02620000 |
| 56   | 1408.78030000 | 11.45710000  |
| 57   | 1427.42700000 | 139.52040000 |
| 58   | 1448.35200000 | 15.62660000  |
| 59   | 1456.93240000 | 3.99780000   |
| 60   | 1471.10750000 | 19.35910000  |

|    |               |               |
|----|---------------|---------------|
| 61 | 1481.53440000 | 6.01280000    |
| 62 | 1484.45630000 | 10.27420000   |
| 63 | 1489.25170000 | 40.71600000   |
| 64 | 1491.41860000 | 6.85010000    |
| 65 | 1501.38420000 | 10.08760000   |
| 66 | 1505.66720000 | 34.57150000   |
| 67 | 1514.02030000 | 23.65450000   |
| 68 | 1530.44290000 | 16.76210000   |
| 69 | 1530.78100000 | 260.46730000  |
| 70 | 1656.91460000 | 387.53940000  |
| 71 | 1688.86890000 | 482.08590000  |
| 72 | 2686.42370000 | 13.46680000   |
| 73 | 3073.83210000 | 7.51020000    |
| 74 | 3085.13750000 | 20.23270000   |
| 75 | 3088.47980000 | 7.47520000    |
| 76 | 3092.96580000 | 8.17590000    |
| 77 | 3107.90830000 | 6.43090000    |
| 78 | 3137.41200000 | 5.19270000    |
| 79 | 3163.32860000 | 1349.17950000 |
| 80 | 3171.63750000 | 2.09400000    |
| 81 | 3173.46140000 | 11.69250000   |
| 82 | 3179.18300000 | 3.48150000    |
| 83 | 3190.27410000 | 7.37210000    |
| 84 | 3190.56610000 | 0.52010000    |
| 85 | 3200.30650000 | 8.92430000    |
| 86 | 3295.55470000 | 13.63500000   |
| 87 | 3635.99530000 | 202.74870000  |

**S17. TRANSITION STATE BETWEEN ERGOTHIONINE (1+H)<sub>S</sub> (THIONE; ISOMER A2) AND INTERMEDIATE ERGOTHIONINE (1N<sub>ε</sub>+H)<sub>SH</sub> (THIOL; ISOMER C3) IN MEOH**

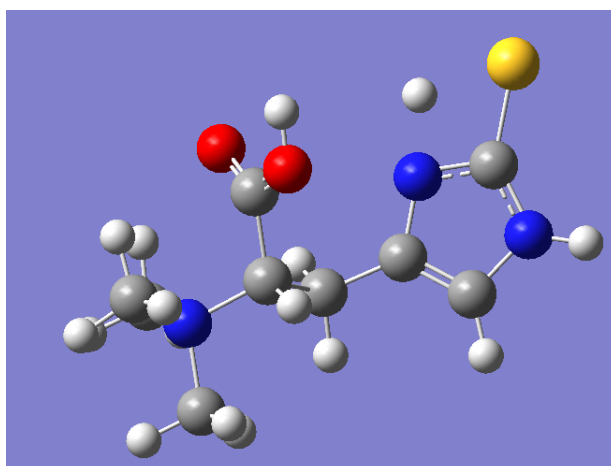

```

Route : # opt=(calcf,ts,noeigen) freq b3lyp/cc-pvtz scrf=(iefpcm,solvent=meth
       : anol) geom=connectivity empiricdispersion=gd3bj int=ultrafine pop=re
       : gular
SMILES : [H].C[N](C)(C)C(Cc1c[nH]c(=S)[nH]1)C(=O)O
Formula : C9H16N3O2S+
Charge : 1
Multiplicity : 1
Energy : -1065.62246946 a.u.
Gibbs Energy : -1065.41140500 a.u.
Number of imaginary frequencies : 1
  
```

**S17.1. Cartesian Co-ordinates (XYZ format)**

31

```

C  1.60383105  2.07639790 -0.35061899
C  0.92661601  1.08379495  0.29497299
C  2.99271011  0.38839301 -0.02488300
N  2.90555310  1.62274599 -0.54265600
H  3.64973402  2.13578010 -0.98433602
H  1.28647995  3.04790211 -0.68199599
N  1.81579804  0.03587700  0.48987600
S  4.11438417 -0.91469502  0.20361200
C -0.50082397  1.02324796  0.71568203
H -0.89694101  2.03422499  0.74144101
H -0.56419301  0.60268402  1.71736300
C -1.32300401  0.16423200 -0.26034999
H -1.22076905  0.55739999 -1.26646197
N -2.82941389  0.19120300  0.02187800
C -0.79981899 -1.27353096 -0.23913100
O -0.23406900 -1.58901405 -1.40200198
O -0.86837798 -2.00475693  0.71537900
C -3.36658907  1.54851699 -0.34150600
H -2.91327691  2.30029607  0.29193699
H -3.14461589  1.74334800 -1.38538802
H -4.43923903  1.53568196 -0.18176500
C -3.16778898 -0.10011400  1.45927000
  
```

H -2.71991992 -1.04500699 1.73909605  
H -2.79373407 0.70238400 2.08326197  
H -4.24852896 -0.14874899 1.53525996  
C -3.51196289 -0.82421601 -0.85561001  
H -4.58314896 -0.69643098 -0.74843103  
H -3.21623206 -0.65294200 -1.88511300  
H -3.22841501 -1.81979895 -0.53436702  
H 0.14450499 -2.48152089 -1.33704400  
H 2.51877308 -1.10883605 0.77841502

## S17.2. Frequencies

| Mode | IR frequency   | IR intensity  |
|------|----------------|---------------|
| 1    | -1739.56470000 | 3739.82080000 |
| 2    | 10.62380000    | 0.93010000    |
| 3    | 46.90570000    | 0.96650000    |
| 4    | 60.21690000    | 1.79770000    |
| 5    | 72.11740000    | 4.32820000    |
| 6    | 84.64070000    | 3.76770000    |
| 7    | 161.27610000   | 2.28490000    |
| 8    | 174.25210000   | 6.37270000    |
| 9    | 188.12950000   | 2.52240000    |
| 10   | 212.89370000   | 0.78740000    |
| 11   | 239.32040000   | 4.35900000    |
| 12   | 267.68500000   | 0.49250000    |
| 13   | 281.47750000   | 1.27170000    |
| 14   | 298.17110000   | 1.29350000    |
| 15   | 314.67200000   | 1.51000000    |
| 16   | 331.15460000   | 6.45750000    |
| 17   | 344.40340000   | 3.96690000    |
| 18   | 416.31720000   | 9.87240000    |
| 19   | 431.56550000   | 1.34230000    |
| 20   | 437.50640000   | 12.95470000   |
| 21   | 466.81250000   | 2.20410000    |
| 22   | 525.63260000   | 16.62750000   |
| 23   | 557.52620000   | 5.38090000    |
| 24   | 580.16920000   | 96.15320000   |
| 25   | 611.41320000   | 156.51490000  |
| 26   | 635.90310000   | 4.17860000    |
| 27   | 660.31680000   | 47.73360000   |
| 28   | 691.17750000   | 27.48380000   |
| 29   | 719.51970000   | 38.05600000   |
| 30   | 752.97690000   | 43.33050000   |
| 31   | 769.73160000   | 11.23280000   |
| 32   | 818.68000000   | 28.72860000   |
| 33   | 827.38260000   | 40.18880000   |
| 34   | 834.14020000   | 18.37120000   |
| 35   | 915.44490000   | 38.69500000   |
| 36   | 955.37480000   | 32.48330000   |
| 37   | 971.70510000   | 33.14590000   |
| 38   | 996.65170000   | 7.91930000    |
| 39   | 1011.00890000  | 8.22010000    |
| 40   | 1039.57710000  | 2.70320000    |
| 41   | 1058.60960000  | 1.00040000    |
| 42   | 1082.40330000  | 0.09300000    |
| 43   | 1093.76230000  | 70.93090000   |
| 44   | 1138.66220000  | 63.41100000   |
| 45   | 1155.83810000  | 12.65520000   |
| 46   | 1160.25030000  | 219.67180000  |
| 47   | 1199.45160000  | 50.07090000   |
| 48   | 1248.00250000  | 0.88550000    |
| 49   | 1258.17090000  | 33.23320000   |

|    |               |              |
|----|---------------|--------------|
| 50 | 1265.81520000 | 4.82400000   |
| 51 | 1284.63130000 | 35.83830000  |
| 52 | 1292.95330000 | 0.69700000   |
| 53 | 1319.32610000 | 45.80210000  |
| 54 | 1349.45540000 | 16.12020000  |
| 55 | 1357.87270000 | 13.77740000  |
| 56 | 1383.94200000 | 30.37620000  |
| 57 | 1435.35380000 | 43.75500000  |
| 58 | 1449.96240000 | 15.16780000  |
| 59 | 1452.75870000 | 58.05470000  |
| 60 | 1455.92110000 | 8.08920000   |
| 61 | 1477.88240000 | 5.05920000   |
| 62 | 1484.19440000 | 15.20860000  |
| 63 | 1490.38250000 | 3.66810000   |
| 64 | 1492.58710000 | 16.76520000  |
| 65 | 1497.14120000 | 9.08060000   |
| 66 | 1499.49150000 | 249.53310000 |
| 67 | 1505.66200000 | 46.83990000  |
| 68 | 1514.15560000 | 45.24280000  |
| 69 | 1526.63400000 | 78.81890000  |
| 70 | 1613.15900000 | 33.21290000  |
| 71 | 1746.56840000 | 17.96290000  |
| 72 | 1794.81390000 | 429.16500000 |
| 73 | 3078.57040000 | 8.46370000   |
| 74 | 3088.87790000 | 4.29430000   |
| 75 | 3094.80320000 | 2.76200000   |
| 76 | 3099.15330000 | 9.41030000   |
| 77 | 3128.94700000 | 0.78610000   |
| 78 | 3140.68350000 | 3.51460000   |
| 79 | 3178.45520000 | 0.70370000   |
| 80 | 3182.23110000 | 3.95160000   |
| 81 | 3186.28660000 | 2.93030000   |
| 82 | 3186.86280000 | 1.48390000   |
| 83 | 3199.28900000 | 2.57610000   |
| 84 | 3204.43810000 | 2.04520000   |
| 85 | 3274.10610000 | 4.40240000   |
| 86 | 3648.87720000 | 194.58160000 |
| 87 | 3705.82040000 | 156.93360000 |



**S18. TRANSITION STATE BETWEEN ERGOTHIONINE (1+H)<sub>S</sub> (THIONE; ISOMER A2) AND INTERMEDIATE ERGOTHIONINE (1N $\epsilon$ +H)<sub>SH</sub> (THIOL; ISOMER C3)**

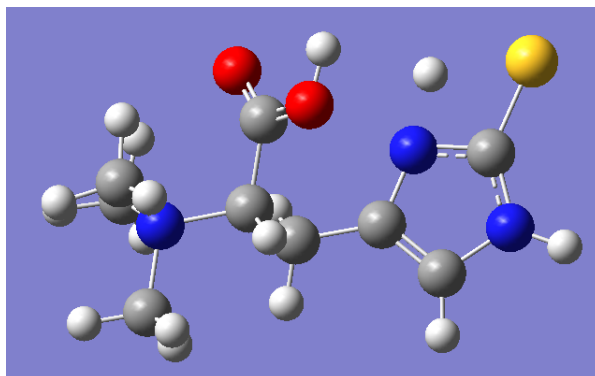

```

Route : # opt=qst2 freq b3lyp/cc-pvtz geom=connectivity empiricaldispersion=gd
       : 3bj int=ultrafine pop=regular
SMILES : C[N](C)(C)C(Cc1c[nH]c(=S)[nH]1)C(=O)O
Formula : C9H16N3O2S+
Charge : 1
Multiplicity : 1
Energy : -1065.53741181 a.u.
Gibbs Energy : -1065.32607000 a.u.
Number of imaginary frequencies : 1

```

**S18.1. Cartesian Co-ordinates (XYZ format)**

31

```

C 1.61482501 1.96945298 -0.50125998
C 0.88096702 1.07228398 0.21627600
C 2.90250611 0.21443500 -0.04645400
N 2.88521290 1.41716099 -0.65566200
H 3.66591096 1.84646201 -1.12147105
H 1.36312199 2.93667006 -0.89722699
N 1.69893396 -0.01132600 0.49216300
S 3.93374896 -1.11821401 0.26907501
C -0.54844397 1.10458302 0.63268399
H -0.91171700 2.12853408 0.58200002
H -0.62299597 0.76133102 1.66378903
C -1.39912105 0.19539601 -0.27558100
H -1.33550799 0.54297400 -1.30277896
N -2.90216303 0.22344799 0.05783500
C -0.87288201 -1.24203897 -0.21133800
O -0.25877699 -1.56410897 -1.34771895
O -0.99901599 -1.95939398 0.74397302
C -3.46034288 1.56398296 -0.32728001
H -2.98248005 2.33951211 0.25914800
H -3.28673601 1.72900701 -1.38646197
H -4.52646208 1.55974102 -0.12231200
C -3.19012594 -0.02406700 1.51701999
H -2.71114612 -0.94915998 1.81440103
H -2.81074500 0.80746102 2.09953403
H -4.26791811 -0.08907400 1.63222599
C -3.60778189 -0.82507098 -0.76199001

```

H -4.67791414 -0.69568402 -0.63441300  
H -3.33829689 -0.69432300 -1.80604804  
H -3.31217003 -1.80764794 -0.41205701  
H 0.16618700 -2.43230295 -1.24544799  
H 2.29072309 -1.14064395 0.88672000

### S18.2. Frequencies

| Mode | IR frequency   | IR intensity  |
|------|----------------|---------------|
| 1    | -1693.97140000 | 1843.69440000 |
| 2    | 16.16760000    | 0.15980000    |
| 3    | 44.36410000    | 0.84050000    |
| 4    | 59.10320000    | 1.67610000    |
| 5    | 70.98880000    | 1.16590000    |
| 6    | 93.30790000    | 2.39990000    |
| 7    | 163.70720000   | 1.28170000    |
| 8    | 178.01040000   | 6.69550000    |
| 9    | 191.00260000   | 1.96420000    |
| 10   | 223.23500000   | 1.21230000    |
| 11   | 245.76670000   | 3.17120000    |
| 12   | 264.97410000   | 0.36950000    |
| 13   | 288.07610000   | 1.88960000    |
| 14   | 294.80540000   | 0.61140000    |
| 15   | 316.36770000   | 0.97360000    |
| 16   | 334.11940000   | 4.55420000    |
| 17   | 346.96010000   | 3.20850000    |
| 18   | 416.17680000   | 4.94360000    |
| 19   | 433.16160000   | 0.40650000    |
| 20   | 436.85300000   | 7.97740000    |
| 21   | 463.61290000   | 1.02570000    |
| 22   | 530.18870000   | 7.25220000    |
| 23   | 561.18230000   | 2.89360000    |
| 24   | 573.71710000   | 63.10900000   |
| 25   | 616.80210000   | 77.59790000   |
| 26   | 634.70960000   | 37.21810000   |
| 27   | 661.57740000   | 30.18490000   |
| 28   | 690.14640000   | 14.73900000   |
| 29   | 723.09630000   | 31.74960000   |
| 30   | 743.61920000   | 36.98440000   |
| 31   | 757.15170000   | 9.48570000    |
| 32   | 816.47230000   | 26.24170000   |
| 33   | 825.03940000   | 25.38800000   |
| 34   | 852.14180000   | 10.03530000   |
| 35   | 908.39580000   | 34.97780000   |
| 36   | 954.07180000   | 23.66780000   |
| 37   | 966.34630000   | 16.10750000   |
| 38   | 993.95180000   | 0.92970000    |
| 39   | 1008.11500000  | 2.48870000    |
| 40   | 1041.93020000  | 1.65400000    |
| 41   | 1050.88000000  | 0.28890000    |
| 42   | 1080.35500000  | 0.09100000    |
| 43   | 1096.31830000  | 38.48270000   |
| 44   | 1136.99730000  | 27.86900000   |
| 45   | 1151.97510000  | 1.12440000    |
| 46   | 1165.80480000  | 119.24980000  |
| 47   | 1198.23210000  | 40.03760000   |
| 48   | 1246.16690000  | 1.20770000    |
| 49   | 1260.15730000  | 31.04700000   |
| 50   | 1266.63580000  | 3.24240000    |
| 51   | 1280.28760000  | 44.25520000   |
| 52   | 1291.55790000  | 0.21450000    |
| 53   | 1317.72220000  | 24.82460000   |

|    |               |              |
|----|---------------|--------------|
| 54 | 1341.87120000 | 10.96540000  |
| 55 | 1355.36590000 | 16.02180000  |
| 56 | 1378.50850000 | 20.23720000  |
| 57 | 1430.75600000 | 22.36740000  |
| 58 | 1439.96960000 | 23.93770000  |
| 59 | 1450.07480000 | 14.04330000  |
| 60 | 1453.08510000 | 7.25410000   |
| 61 | 1478.29220000 | 6.90720000   |
| 62 | 1484.28240000 | 9.03720000   |
| 63 | 1492.07370000 | 9.86980000   |
| 64 | 1497.36410000 | 2.98830000   |
| 65 | 1500.29670000 | 3.57030000   |
| 66 | 1506.58840000 | 260.46020000 |
| 67 | 1511.44970000 | 25.02520000  |
| 68 | 1519.57840000 | 24.40040000  |
| 69 | 1534.67610000 | 56.26390000  |
| 70 | 1616.69980000 | 11.63060000  |
| 71 | 1770.09150000 | 7.04630000   |
| 72 | 1823.12410000 | 223.55190000 |
| 73 | 3066.07280000 | 10.42320000  |
| 74 | 3078.25490000 | 0.43890000   |
| 75 | 3081.60670000 | 0.80500000   |
| 76 | 3087.99090000 | 8.08170000   |
| 77 | 3112.22010000 | 0.82710000   |
| 78 | 3125.37070000 | 2.38100000   |
| 79 | 3163.62710000 | 0.01650000   |
| 80 | 3168.24610000 | 1.50650000   |
| 81 | 3173.22270000 | 1.61180000   |
| 82 | 3181.71470000 | 0.08550000   |
| 83 | 3185.46750000 | 1.41030000   |
| 84 | 3194.75300000 | 5.69410000   |
| 85 | 3263.89690000 | 2.88460000   |
| 86 | 3656.30640000 | 137.46920000 |
| 87 | 3704.19450000 | 117.68060000 |

**S19. INTERMEDIATE ERGOTHIONINE (1N $\epsilon$ +H)<sub>SH</sub> (THIOL; ISOMER C3)**

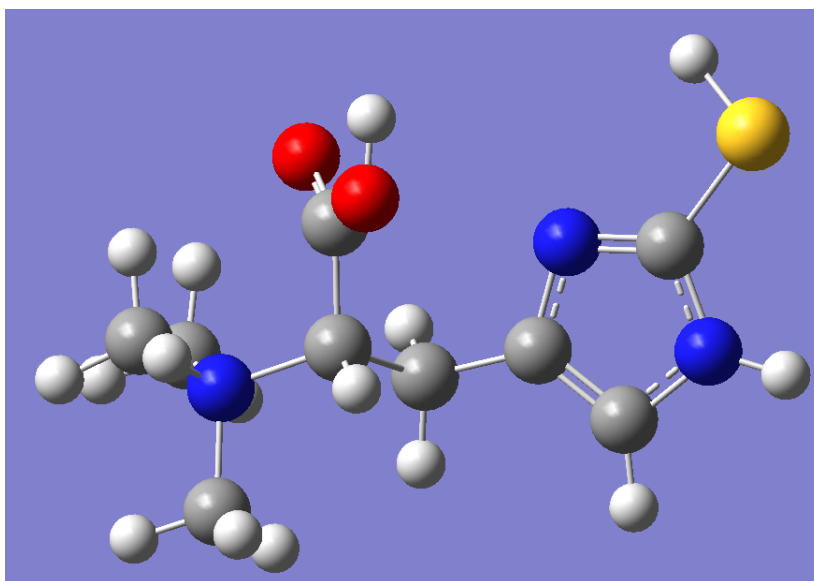

Route : # opt freq b3lyp/cc-pvtz geom=connectivity empiricaldispersion=gd3bj i  
 : nt=ultrafine pop=regular  
 SMILES : C[N](C)(C)C(Cc1c[nH]c(n1)S)C(=O)O  
 Formula : C<sub>9</sub>H<sub>16</sub>N<sub>3</sub>O<sub>2</sub>S<sup>+</sup>  
 Charge : 1  
 Multiplicity : 1  
 Energy : -1065.59559793 a.u.  
 Gibbs Energy : -1065.38003800 a.u.  
 Number of imaginary frequencies : 1

**S19.1. Cartesian Co-ordinates (XYZ format)**

31

```

C  2.15390396  2.52519703 -0.50584400
C  1.15781796  1.69002903 -0.08629700
C  2.92424393  0.47294801 -0.19917500
N  3.28284192  1.73536301 -0.56801897
H  4.21445990  2.04670501 -0.78621399
H  2.17528009  3.57330894 -0.74219602
N  1.64505005  0.41272199  0.09262800
S  4.08884811 -0.84308398 -0.18341500
C -0.28212300  1.98615897  0.17403600
H -0.44576401  3.05817294  0.08500200
H -0.53272098  1.68092704  1.18983698
C -1.17555904  1.22340405 -0.81455201
H -0.87923402  1.44718599 -1.83540106
N -2.66236210  1.63362098 -0.73968703
C -1.05569398 -0.28681600 -0.58109599
O -0.52335602 -0.88963503 -1.64301300
O -1.43626904 -0.83593702  0.41698301
C -2.81487894  3.01292300 -1.31238699
H -2.23883510  3.71734595 -0.72471499
H -2.46816206  3.00842309 -2.34138298
  
```

```

H -3.86586404  3.28297210 -1.27556098
C -3.20013499  1.62335706  0.66740298
H -3.00833988  0.65089399  1.10523903
H -2.70818996  2.40086293  1.24019599
H -4.26602888  1.82444894  0.61471599
C -3.48179412  0.69163299 -1.58070004
H -4.49329090  1.08063400 -1.64313900
H -3.04170799  0.63233000 -2.57173395
H -3.49245691 -0.28568199 -1.11150098
H -0.36263001 -1.82137799 -1.42237306
H  3.37467289 -1.58693194  0.67830199

```

### S19.2. Frequencies

| Mode | IR frequency  | IR intensity |
|------|---------------|--------------|
| 1    | -7.21280000   | 0.09320000   |
| 2    | 48.48550000   | 1.54130000   |
| 3    | 58.85370000   | 1.82690000   |
| 4    | 75.76230000   | 1.39520000   |
| 5    | 105.72880000  | 19.07670000  |
| 6    | 114.19160000  | 5.39980000   |
| 7    | 162.17890000  | 3.05980000   |
| 8    | 188.60480000  | 3.13940000   |
| 9    | 199.73610000  | 8.26050000   |
| 10   | 223.32560000  | 0.84790000   |
| 11   | 250.87540000  | 4.71930000   |
| 12   | 259.25420000  | 2.58880000   |
| 13   | 287.84340000  | 3.76040000   |
| 14   | 293.60250000  | 1.92300000   |
| 15   | 325.05550000  | 1.18080000   |
| 16   | 333.85980000  | 4.67430000   |
| 17   | 346.34520000  | 2.93620000   |
| 18   | 372.35910000  | 6.55810000   |
| 19   | 434.17540000  | 0.61590000   |
| 20   | 438.61810000  | 4.12950000   |
| 21   | 466.53140000  | 0.73360000   |
| 22   | 478.47630000  | 0.44670000   |
| 23   | 538.88210000  | 7.22330000   |
| 24   | 560.25730000  | 76.70510000  |
| 25   | 605.72790000  | 89.86600000  |
| 26   | 656.17970000  | 24.40900000  |
| 27   | 666.84930000  | 10.10980000  |
| 28   | 710.72370000  | 28.61520000  |
| 29   | 719.03750000  | 28.20520000  |
| 30   | 757.15360000  | 27.33060000  |
| 31   | 767.30870000  | 7.80640000   |
| 32   | 816.32240000  | 24.05240000  |
| 33   | 830.12280000  | 25.80270000  |
| 34   | 900.88150000  | 32.67320000  |
| 35   | 916.21540000  | 16.27700000  |
| 36   | 956.36970000  | 22.46190000  |
| 37   | 967.42540000  | 13.52560000  |
| 38   | 993.93520000  | 1.51860000   |
| 39   | 1013.35020000 | 5.45150000   |
| 40   | 1025.94870000 | 2.62560000   |
| 41   | 1059.79370000 | 0.90300000   |
| 42   | 1080.80590000 | 0.07650000   |
| 43   | 1111.74970000 | 32.18690000  |
| 44   | 1137.22470000 | 27.38750000  |
| 45   | 1153.28140000 | 0.84320000   |
| 46   | 1164.91820000 | 115.94110000 |
| 47   | 1195.08340000 | 37.86170000  |

|    |               |              |
|----|---------------|--------------|
| 48 | 1237.03440000 | 26.40500000  |
| 49 | 1249.22610000 | 18.62740000  |
| 50 | 1267.58680000 | 5.89440000   |
| 51 | 1289.57780000 | 0.89000000   |
| 52 | 1299.44480000 | 2.07090000   |
| 53 | 1316.73150000 | 17.23870000  |
| 54 | 1345.83230000 | 5.13650000   |
| 55 | 1357.44110000 | 23.28010000  |
| 56 | 1380.38860000 | 9.19020000   |
| 57 | 1427.54390000 | 14.65530000  |
| 58 | 1439.66300000 | 38.87100000  |
| 59 | 1450.77910000 | 12.42150000  |
| 60 | 1452.98750000 | 7.33580000   |
| 61 | 1475.44250000 | 5.76720000   |
| 62 | 1483.96300000 | 8.09190000   |
| 63 | 1491.91440000 | 11.13820000  |
| 64 | 1497.57690000 | 0.90540000   |
| 65 | 1499.95120000 | 6.69320000   |
| 66 | 1510.83900000 | 29.98170000  |
| 67 | 1514.43470000 | 102.77940000 |
| 68 | 1519.73280000 | 29.71310000  |
| 69 | 1534.33990000 | 56.74920000  |
| 70 | 1606.27860000 | 11.97760000  |
| 71 | 1823.71060000 | 224.79180000 |
| 72 | 2691.14440000 | 3.78570000   |
| 73 | 3060.43390000 | 11.97720000  |
| 74 | 3078.36840000 | 0.58220000   |
| 75 | 3081.35710000 | 1.34350000   |
| 76 | 3087.13170000 | 8.28940000   |
| 77 | 3108.92990000 | 2.34490000   |
| 78 | 3122.16060000 | 3.42920000   |
| 79 | 3163.21190000 | 0.06010000   |
| 80 | 3167.98270000 | 1.74290000   |
| 81 | 3172.58070000 | 2.13630000   |
| 82 | 3180.82920000 | 0.15270000   |
| 83 | 3186.37220000 | 1.69680000   |
| 84 | 3192.55340000 | 4.59790000   |
| 85 | 3269.14300000 | 1.44210000   |
| 86 | 3641.30800000 | 106.17780000 |
| 87 | 3719.19500000 | 116.92040000 |

**S20. TRANSITION STATE BETWEEN INTERMEDIATE ERGOTHIONINE (1N $\epsilon$ +H)<sub>SH</sub> (THIOL; ISOMER C3) AND ERGOTHIONINE (1N $\epsilon$ +H)<sub>SH</sub> (THIOL; ISOMER B)**

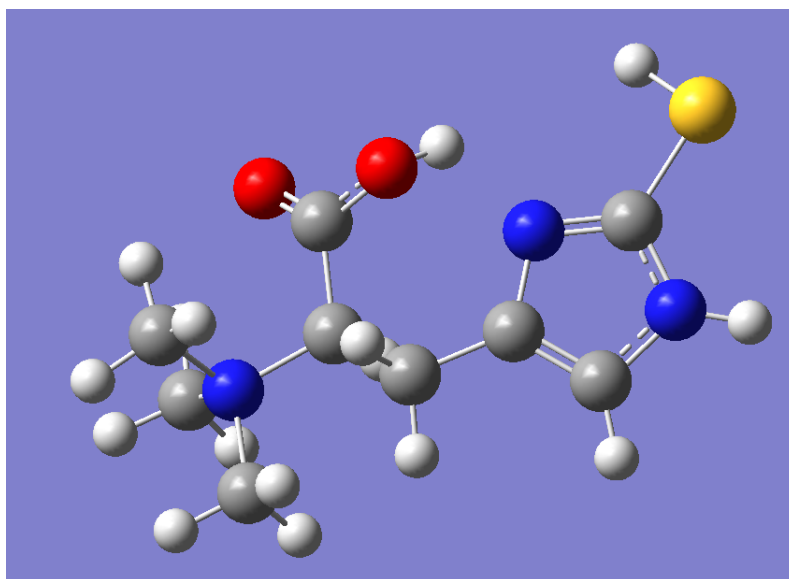

```

Route                : # opt=(calcfc,qst3,noeigen) freq b3lyp/cc-pvtz geom=connectivity empir
                    : icaldispersion=gd3bj int=ultrafine pop=regular
SMILES               : C[N](C)(C)C(Cc1c[nH]c(n1)S)C(=O)O
Formula              : C9H16N3O2S+
Charge               : 1
Multiplicity         : 1
Energy               : -1065.58565517 a.u.
Gibbs Energy        : -1065.37266700 a.u.
Number of imaginary frequencies : 1

```

**S20.1. Cartesian Co-ordinates (XYZ format)**

31

```

C  2.22121596  2.69492888 -0.90482098
C  1.07476699  1.99613404 -0.66097599
C  2.69804597  0.58964401 -0.41953000
N  3.24825096  1.79009104 -0.74310702
H  2.40135908  3.72568893 -1.14971006
N  1.38541996  0.67758203 -0.36416301
S  3.68690991 -0.84224898 -0.18594900
C -0.32502800  2.52807689 -0.60873401
H -0.73280299  2.34013796  0.38495201
H -0.27244300  3.60571408 -0.75020897
C -1.28510904  1.91009700 -1.65436101
H -0.87510401  2.02495694 -2.65375090
N -2.65410089  2.61119390 -1.70221996
C -1.40263104  0.41929200 -1.33480096
O -2.17558002 -0.02374700 -0.53222197
O -0.48512101 -0.28042400 -2.01189089
C -2.48671198  3.97088790 -2.31606889
H -3.46498609  4.43647814 -2.38626003
H -1.84231305  4.57788181 -1.69149303

```

```

H -2.05671811  3.86136508 -3.30715489
C -3.29641390  2.76324511 -0.34769401
H -4.28809404  3.17916989 -0.49901101
H -3.35307288  1.78729904  0.11832900
H -2.70412588  3.44426107  0.25257501
C -3.57613301  1.81603003 -2.59064293
H -3.80309606  0.87207401 -2.11074591
H -4.48583984  2.38983989 -2.73754907
H -3.08329892  1.65051901 -3.54454589
H  2.80042005 -1.44445205  0.62580597
H  0.23715501 -0.51401502 -1.38280702
H  4.23293495  1.99103200 -0.79846799

```

## S20.2. Frequencies

| Mode | IR frequency  | IR intensity |
|------|---------------|--------------|
| 1    | -378.16210000 | 259.63560000 |
| 2    | 36.95800000   | 0.26260000   |
| 3    | 50.39420000   | 1.52150000   |
| 4    | 72.60590000   | 1.20690000   |
| 5    | 91.00800000   | 0.43390000   |
| 6    | 120.24410000  | 21.95430000  |
| 7    | 157.40150000  | 2.72060000   |
| 8    | 170.84690000  | 16.38350000  |
| 9    | 195.00110000  | 6.27740000   |
| 10   | 220.85590000  | 1.93660000   |
| 11   | 236.51880000  | 5.60030000   |
| 12   | 254.50310000  | 2.13100000   |
| 13   | 275.00480000  | 1.17830000   |
| 14   | 288.88540000  | 3.02970000   |
| 15   | 305.69190000  | 5.75010000   |
| 16   | 321.28680000  | 2.38880000   |
| 17   | 336.29370000  | 6.26360000   |
| 18   | 348.33290000  | 4.39720000   |
| 19   | 379.16980000  | 9.18470000   |
| 20   | 424.56740000  | 1.61240000   |
| 21   | 433.79220000  | 0.50010000   |
| 22   | 467.25420000  | 0.18310000   |
| 23   | 483.25630000  | 2.20850000   |
| 24   | 547.15800000  | 2.22530000   |
| 25   | 576.29430000  | 79.97660000  |
| 26   | 655.52870000  | 1.59340000   |
| 27   | 677.07040000  | 19.59810000  |
| 28   | 703.55740000  | 2.08550000   |
| 29   | 723.31070000  | 2.17480000   |
| 30   | 749.54190000  | 1.37340000   |
| 31   | 775.14110000  | 20.79100000  |
| 32   | 819.76490000  | 19.76890000  |
| 33   | 841.05660000  | 12.78370000  |
| 34   | 909.03040000  | 45.22860000  |
| 35   | 924.44600000  | 18.34350000  |
| 36   | 951.57260000  | 25.64300000  |
| 37   | 966.61750000  | 16.26360000  |
| 38   | 996.90690000  | 1.39200000   |
| 39   | 1013.04540000 | 4.02860000   |
| 40   | 1019.01790000 | 9.24000000   |
| 41   | 1030.74520000 | 3.79990000   |
| 42   | 1078.96440000 | 0.12440000   |
| 43   | 1116.54200000 | 35.14510000  |
| 44   | 1135.56410000 | 54.26290000  |
| 45   | 1149.31170000 | 1.80790000   |
| 46   | 1154.93460000 | 100.92510000 |



|    |               |              |
|----|---------------|--------------|
| 47 | 1192.71800000 | 50.65570000  |
| 48 | 1237.41050000 | 33.37110000  |
| 49 | 1252.45560000 | 33.07320000  |
| 50 | 1262.98040000 | 10.99910000  |
| 51 | 1287.71850000 | 9.00610000   |
| 52 | 1295.35370000 | 5.21150000   |
| 53 | 1301.07260000 | 21.35630000  |
| 54 | 1338.44150000 | 0.65910000   |
| 55 | 1352.46050000 | 10.41230000  |
| 56 | 1360.40610000 | 25.92230000  |
| 57 | 1411.54220000 | 13.79260000  |
| 58 | 1443.97010000 | 28.64390000  |
| 59 | 1446.17760000 | 11.98150000  |
| 60 | 1452.10680000 | 13.65460000  |
| 61 | 1477.29690000 | 4.49510000   |
| 62 | 1484.75520000 | 6.52800000   |
| 63 | 1491.33530000 | 14.63350000  |
| 64 | 1497.26900000 | 1.74840000   |
| 65 | 1501.94670000 | 3.70260000   |
| 66 | 1511.59660000 | 25.70350000  |
| 67 | 1514.31490000 | 106.67990000 |
| 68 | 1519.45400000 | 25.10080000  |
| 69 | 1536.28440000 | 56.05590000  |
| 70 | 1606.08340000 | 15.46710000  |
| 71 | 1816.68940000 | 255.78610000 |
| 72 | 2686.42410000 | 4.72320000   |
| 73 | 3053.95280000 | 9.75160000   |
| 74 | 3078.23290000 | 0.80460000   |
| 75 | 3081.51150000 | 1.16960000   |
| 76 | 3087.86460000 | 9.36960000   |
| 77 | 3104.55060000 | 3.02620000   |
| 78 | 3120.29840000 | 2.22830000   |
| 79 | 3161.41480000 | 0.17650000   |
| 80 | 3166.43830000 | 2.25200000   |
| 81 | 3171.35720000 | 2.56990000   |
| 82 | 3183.70040000 | 2.27630000   |
| 83 | 3191.61080000 | 0.07980000   |
| 84 | 3197.07310000 | 6.95340000   |
| 85 | 3270.31710000 | 2.27700000   |
| 86 | 3424.47550000 | 649.13600000 |
| 87 | 3639.56260000 | 116.30220000 |

## S21. HERCYNINE (CONFORMER A)

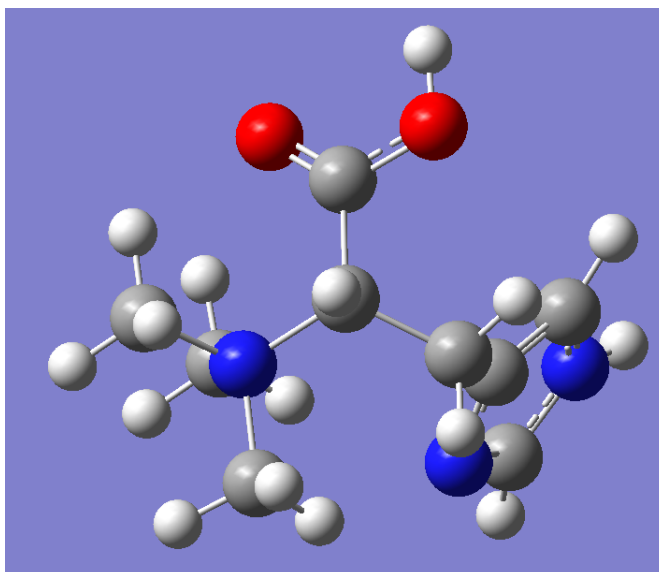

```

Route : # opt freq b3lyp/cc-pvtz geom=connectivity empiricaldispersion=gd3bj i
       : nt=ultrafine pop=regular
SMILES : C[N](C)(C)C(Cc1c[nH]cn1)C(=O)O
Formula : C9H16N3O2+
Charge : 1
Multiplicity : 1
Energy : -667.37374957 a.u.
Gibbs Energy : -667.15464500 a.u.
Number of imaginary frequencies : 0

```

## S21.1. Cartesian Co-ordinates (XYZ format)

30

```

C 2.49005008 0.89410597 0.14885400
C 1.54090500 -0.00742300 0.55024600
C 3.00394797 -1.13282096 -0.55782998
N 3.41367507 0.16177601 -0.55707502
H 4.25670719 0.51816100 -0.97572303
H 2.59838891 1.94989204 0.31670299
N 1.87559605 -1.26934600 0.10127500
C 0.34031799 0.21269000 1.40590501
H 0.45856899 1.13819301 1.96406305
H 0.27881801 -0.57904500 2.14882302
C -1.03094900 0.35443699 0.71075201
H -1.75545299 0.52727097 1.50815797
N -1.57096696 -0.89621401 -0.00162200
C -1.10565197 1.59881604 -0.17861700
O -1.56148398 1.66024899 -1.28795505
O -0.62755299 2.65439010 0.48959601
C -1.33962905 -2.10170388 0.87082398
H -0.27730301 -2.32130694 0.89139003
H -1.72096896 -1.90084803 1.86801696
H -1.88317204 -2.93219709 0.43164301

```

```

C -0.94052702 -1.18672001 -1.34709501
H -1.13839102 -0.36069101 -2.01462412
H 0.12010800 -1.34547603 -1.19900405
H -1.40393102 -2.09618092 -1.71811604
C -3.05723906 -0.73527402 -0.19280200
H -3.43404007 -1.63429296 -0.66990203
H -3.52452493 -0.61215299 0.78014302
H -3.24085093 0.12599300 -0.82273901
H -0.73658401 3.44065404 -0.06913400
H 3.55574894 -1.92114305 -1.04040694

```

## S21.2. Frequencies

| Mode | IR frequency  | IR intensity |
|------|---------------|--------------|
| 1    | 34.97000000   | 4.32480000   |
| 2    | 36.85970000   | 3.54670000   |
| 3    | 61.34850000   | 3.53610000   |
| 4    | 105.87800000  | 0.33800000   |
| 5    | 136.74200000  | 4.98510000   |
| 6    | 219.53900000  | 8.53060000   |
| 7    | 227.00540000  | 1.09710000   |
| 8    | 244.28180000  | 3.12200000   |
| 9    | 265.49120000  | 5.76910000   |
| 10   | 277.58420000  | 2.51490000   |
| 11   | 307.46460000  | 5.89010000   |
| 12   | 340.65600000  | 6.18040000   |
| 13   | 351.00190000  | 0.07980000   |
| 14   | 368.41060000  | 6.90250000   |
| 15   | 415.07360000  | 0.91210000   |
| 16   | 430.79370000  | 2.29660000   |
| 17   | 439.59070000  | 0.72760000   |
| 18   | 522.98680000  | 12.50900000  |
| 19   | 545.39720000  | 8.59920000   |
| 20   | 588.73110000  | 68.31240000  |
| 21   | 604.99580000  | 59.02330000  |
| 22   | 639.65470000  | 47.79750000  |
| 23   | 659.84090000  | 28.61530000  |
| 24   | 673.90750000  | 10.94720000  |
| 25   | 704.13160000  | 25.09280000  |
| 26   | 728.75460000  | 11.30290000  |
| 27   | 786.93710000  | 16.69000000  |
| 28   | 808.63770000  | 19.98260000  |
| 29   | 857.58720000  | 19.78900000  |
| 30   | 864.11600000  | 2.17640000   |
| 31   | 887.33380000  | 42.00030000  |
| 32   | 951.21030000  | 18.72030000  |
| 33   | 959.63680000  | 10.15370000  |
| 34   | 962.50330000  | 0.43140000   |
| 35   | 981.34090000  | 15.00750000  |
| 36   | 1006.47290000 | 18.70840000  |
| 37   | 1040.98810000 | 27.04320000  |
| 38   | 1085.89370000 | 0.52380000   |
| 39   | 1102.51090000 | 24.89110000  |
| 40   | 1141.52930000 | 16.84760000  |
| 41   | 1145.49720000 | 31.92090000  |
| 42   | 1150.02590000 | 39.10510000  |
| 43   | 1173.34680000 | 159.18320000 |
| 44   | 1222.54900000 | 4.07860000   |
| 45   | 1248.39430000 | 0.98680000   |
| 46   | 1258.84200000 | 2.39280000   |
| 47   | 1265.08230000 | 5.12730000   |
| 48   | 1294.71530000 | 1.57860000   |

|    |               |              |
|----|---------------|--------------|
| 49 | 1299.64280000 | 2.05320000   |
| 50 | 1319.46080000 | 0.63020000   |
| 51 | 1343.38540000 | 14.33270000  |
| 52 | 1365.78070000 | 3.98130000   |
| 53 | 1403.61360000 | 6.68070000   |
| 54 | 1415.31340000 | 23.81950000  |
| 55 | 1448.52740000 | 8.86810000   |
| 56 | 1451.88240000 | 4.82160000   |
| 57 | 1456.60010000 | 20.68120000  |
| 58 | 1481.61460000 | 20.00150000  |
| 59 | 1483.08060000 | 2.65170000   |
| 60 | 1493.90930000 | 14.60230000  |
| 61 | 1501.58840000 | 10.34670000  |
| 62 | 1507.28770000 | 2.62830000   |
| 63 | 1517.22390000 | 21.12500000  |
| 64 | 1525.15950000 | 0.50470000   |
| 65 | 1529.51320000 | 38.30110000  |
| 66 | 1545.11140000 | 32.57090000  |
| 67 | 1601.05080000 | 6.11100000   |
| 68 | 1822.11170000 | 242.50970000 |
| 69 | 3060.14010000 | 1.67480000   |
| 70 | 3069.56740000 | 3.75440000   |
| 71 | 3080.66720000 | 2.45890000   |
| 72 | 3089.22840000 | 17.89130000  |
| 73 | 3091.15140000 | 20.77300000  |
| 74 | 3126.06240000 | 0.99880000   |
| 75 | 3159.78140000 | 0.31670000   |
| 76 | 3165.18380000 | 6.04110000   |
| 77 | 3169.95590000 | 0.88290000   |
| 78 | 3175.38550000 | 20.43490000  |
| 79 | 3194.86990000 | 1.82150000   |
| 80 | 3219.23110000 | 15.35190000  |
| 81 | 3255.03130000 | 1.94020000   |
| 82 | 3272.85770000 | 1.72510000   |
| 83 | 3640.85200000 | 117.19070000 |
| 84 | 3721.09380000 | 144.96290000 |

## S22. HERCYNINE (CONFORMER B)

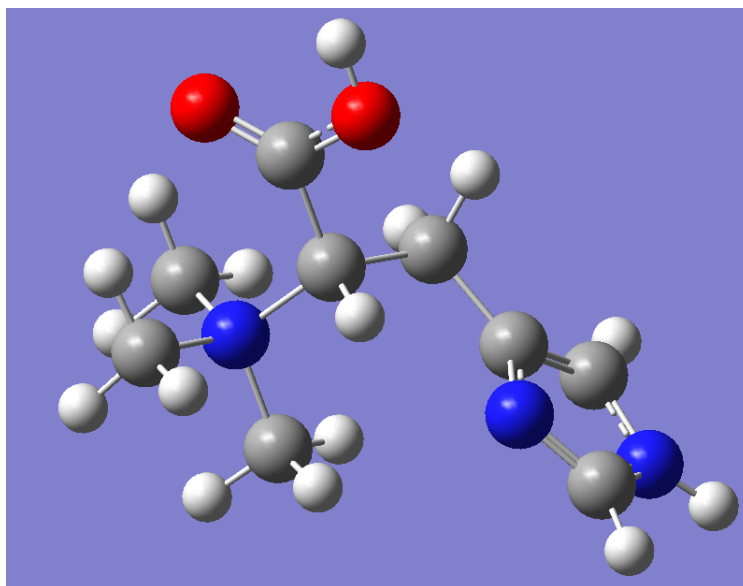

```

Route : # opt freq b3lyp/cc-pvtz geom=connectivity empiricaldispersion=gd3bj i
       : nt=ultrafine pop=regular
SMILES : C[N](C)(C)C(Cc1c[nH]cn1)C(=O)O
Formula : C9H16N3O2+
Charge : 1
Multiplicity : 1
Energy : -667.37248367 a.u.
Gibbs Energy : -667.15228800 a.u.
Number of imaginary frequencies : 1

```

## S22.1. Cartesian Co-ordinates (XYZ format)

30

```

C -2.79852700 -0.70270097 -1.05536199
C -1.68843305 -0.56571901 -0.26628399
C -3.33555007 0.18616401 0.89286900
N -3.84158897 -0.22061300 -0.29791000
H -4.80801678 -0.18542901 -0.57689297
H -2.94313598 -1.10268795 -2.04237008
N -2.03589511 -0.00698100 0.94189602
C -0.27768701 -1.00032401 -0.53241903
H -0.03537600 -0.94656801 -1.59269595
H -0.17766300 -2.05131292 -0.25981599
C 0.75501698 -0.24377100 0.32349399
H 0.26122800 -0.00057700 1.26383400
N 1.20435703 1.10669303 -0.24908800
C 1.94441605 -1.14624798 0.64043301
O 3.06201911 -1.04161704 0.20811500
O 1.54990304 -2.10320091 1.48362398
C 0.00605300 2.00310612 -0.41621101
H -0.64932501 1.58893299 -1.17261398
H -0.52499902 2.06264091 0.52714902
H 0.36597601 2.97949195 -0.72517198

```

```

C  1.89611495  0.99319798 -1.58205700
H  2.76389599  0.35598999 -1.47633302
H  1.20172703  0.58540201 -2.30749798
H  2.18712497  1.99418497 -1.88592303
C  2.13231802  1.77570403  0.73300397
H  2.35252309  2.77213907  0.36332700
H  1.62712097  1.84132600  1.69224596
H  3.04352689  1.19751406  0.81459600
H  2.30019689 -2.69403601  1.65774906
H -3.94265389  0.61010200  1.67411101

```

## S22.2. Frequencies

| Mode | IR frequency  | IR intensity |
|------|---------------|--------------|
| 1    | -14.38230000  | 0.87070000   |
| 2    | 50.45590000   | 2.09980000   |
| 3    | 68.99260000   | 4.86660000   |
| 4    | 92.90920000   | 1.78070000   |
| 5    | 133.26550000  | 5.77390000   |
| 6    | 198.22940000  | 3.08070000   |
| 7    | 220.18250000  | 0.92200000   |
| 8    | 246.42500000  | 13.22300000  |
| 9    | 256.09430000  | 1.16190000   |
| 10   | 275.78830000  | 3.00060000   |
| 11   | 291.61220000  | 1.64910000   |
| 12   | 313.51070000  | 1.06930000   |
| 13   | 329.17150000  | 2.39490000   |
| 14   | 345.34470000  | 4.79220000   |
| 15   | 363.15120000  | 11.63420000  |
| 16   | 422.87360000  | 0.48780000   |
| 17   | 435.64800000  | 1.21130000   |
| 18   | 491.01740000  | 2.01070000   |
| 19   | 551.69420000  | 9.39090000   |
| 20   | 588.74000000  | 86.11550000  |
| 21   | 605.92850000  | 88.97120000  |
| 22   | 650.69020000  | 23.39000000  |
| 23   | 661.20920000  | 29.24690000  |
| 24   | 684.53800000  | 17.57670000  |
| 25   | 712.77170000  | 7.70620000   |
| 26   | 747.43020000  | 7.36600000   |
| 27   | 778.45390000  | 6.44930000   |
| 28   | 789.89930000  | 25.46360000  |
| 29   | 852.23820000  | 25.90670000  |
| 30   | 864.18930000  | 13.38030000  |
| 31   | 909.92600000  | 24.96080000  |
| 32   | 947.62640000  | 25.10280000  |
| 33   | 962.77210000  | 7.29120000   |
| 34   | 970.01500000  | 8.49910000   |
| 35   | 988.97100000  | 12.18240000  |
| 36   | 1010.07360000 | 41.49540000  |
| 37   | 1061.76140000 | 2.71380000   |
| 38   | 1080.30860000 | 0.01540000   |
| 39   | 1100.01960000 | 25.29680000  |
| 40   | 1137.18710000 | 26.18550000  |
| 41   | 1140.80110000 | 24.21840000  |
| 42   | 1155.47990000 | 11.40730000  |
| 43   | 1171.77950000 | 181.48560000 |
| 44   | 1212.11000000 | 3.75330000   |
| 45   | 1250.44480000 | 2.65500000   |
| 46   | 1254.57140000 | 29.70820000  |
| 47   | 1274.52160000 | 1.69660000   |
| 48   | 1290.44010000 | 2.52950000   |

|    |               |              |
|----|---------------|--------------|
| 49 | 1302.11170000 | 3.13340000   |
| 50 | 1304.96330000 | 2.53050000   |
| 51 | 1335.28320000 | 5.57670000   |
| 52 | 1361.24860000 | 51.48430000  |
| 53 | 1394.94820000 | 26.96930000  |
| 54 | 1433.38670000 | 14.64760000  |
| 55 | 1445.92410000 | 12.03140000  |
| 56 | 1455.04990000 | 2.23280000   |
| 57 | 1460.44650000 | 25.04620000  |
| 58 | 1474.96990000 | 7.36600000   |
| 59 | 1481.02430000 | 4.06440000   |
| 60 | 1491.22110000 | 32.95180000  |
| 61 | 1498.02090000 | 7.33490000   |
| 62 | 1502.08390000 | 1.03860000   |
| 63 | 1513.71410000 | 15.72020000  |
| 64 | 1518.34060000 | 19.28830000  |
| 65 | 1523.00860000 | 28.86660000  |
| 66 | 1537.45370000 | 58.31440000  |
| 67 | 1594.94100000 | 10.84390000  |
| 68 | 1816.85280000 | 284.31280000 |
| 69 | 3061.00440000 | 7.55430000   |
| 70 | 3079.05800000 | 18.84940000  |
| 71 | 3081.59840000 | 1.78830000   |
| 72 | 3085.01810000 | 2.86260000   |
| 73 | 3091.65350000 | 6.41240000   |
| 74 | 3097.88430000 | 6.50320000   |
| 75 | 3164.20720000 | 1.15690000   |
| 76 | 3170.83780000 | 1.31500000   |
| 77 | 3176.82170000 | 2.32710000   |
| 78 | 3188.29500000 | 1.21340000   |
| 79 | 3198.59530000 | 0.59370000   |
| 80 | 3206.67120000 | 6.40370000   |
| 81 | 3255.52140000 | 1.83180000   |
| 82 | 3268.99470000 | 1.60060000   |
| 83 | 3639.99530000 | 117.19460000 |
| 84 | 3721.61340000 | 157.31040000 |

## S23. HERCYNINE (CONFORMER C)

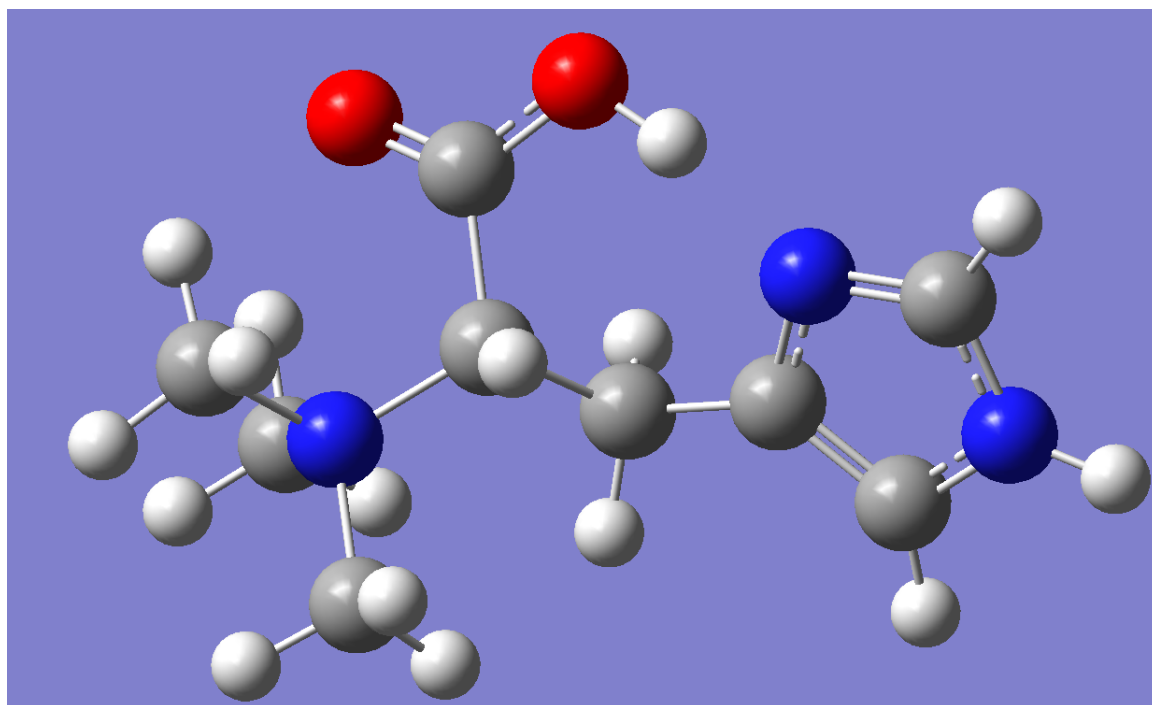

```

Route                : # opt freq b3lyp/cc-pvtz geom=connectivity empiricaldispersion=gd3bj i
                    : nt=ultrafine pop=regular
SMILES               : C[N](C)(C)C(Cc1c[nH]cn1)C(=O)O
Formula              : C9H16N3O2+
Charge               : 1
Multiplicity        : 1
Energy               : -667.37624043
Gibbs Energy        : -667.15661600
Number of imaginary frequencies : 0

```

a.u.  
a.u.

## S23.1. Cartesian Co-ordinates (XYZ format)

30

```

C  2.79753208 -1.26665294 -0.51397300
C  1.74280298 -0.40939301 -0.37264100
C  3.42008209  0.51801699  0.63329101
N  3.85257602 -0.65811002  0.12796099
H  2.89584899 -2.21795607 -1.00351501
N  2.14745307  0.69340199  0.34832600
C  0.33938000 -0.51221597 -0.88567400
H  0.13170700 -1.55560601 -1.10571206
H  0.23977500  0.02591500 -1.83039296
C -0.67340797  0.06437900  0.13515900
H -0.25911501 -0.02925900  1.13726497
N -1.98685205 -0.72685200  0.20324200
C -0.91309702  1.56930399 -0.15198000
O -1.96489000  1.98371196 -0.57354099
O  0.12223800  2.33467889  0.08104600

```



C -1.69806099 -2.11297989 0.70587701  
 H -1.07279098 -2.64583206 0.00049100  
 H -1.20040596 -2.04272795 1.66850305  
 H -2.64256907 -2.63638306 0.81509298  
 C -2.67621899 -0.82202202 -1.13291705  
 H -2.89366198 0.18140601 -1.47552299  
 H -2.02566004 -1.33807194 -1.83074796  
 H -3.58966899 -1.39290404 -0.99534899  
 C -2.92380309 -0.08628100 1.20164001  
 H -3.78125906 -0.74130398 1.31976104  
 H -2.40021896 0.01177200 2.14860201  
 H -3.22638297 0.88195598 0.82828802  
 H 0.96451998 1.82056105 0.32148200  
 H 4.78680801 -1.02516699 0.20690000  
 H 4.04574919 1.19668806 1.18590295

### S23.2. Frequencies

| Mode | IR frequency  | IR intensity |
|------|---------------|--------------|
| 1    | 44.00650000   | 1.52530000   |
| 2    | 71.24550000   | 0.64520000   |
| 3    | 90.99300000   | 0.99120000   |
| 4    | 112.54680000  | 2.57940000   |
| 5    | 167.74300000  | 5.06940000   |
| 6    | 208.09520000  | 3.83670000   |
| 7    | 229.93900000  | 9.43830000   |
| 8    | 242.48670000  | 3.05390000   |
| 9    | 260.84560000  | 5.39960000   |
| 10   | 262.73070000  | 6.22190000   |
| 11   | 281.46310000  | 0.76810000   |
| 12   | 319.58120000  | 7.93000000   |
| 13   | 328.49350000  | 12.55290000  |
| 14   | 358.43870000  | 3.09000000   |
| 15   | 369.83420000  | 3.68050000   |
| 16   | 428.35980000  | 1.03620000   |
| 17   | 439.03530000  | 1.00140000   |
| 18   | 485.15010000  | 1.96520000   |
| 19   | 552.49830000  | 2.79630000   |
| 20   | 603.76120000  | 89.71300000  |
| 21   | 655.19270000  | 6.14400000   |
| 22   | 675.90230000  | 12.85500000  |
| 23   | 683.69030000  | 8.19160000   |
| 24   | 727.47240000  | 0.70120000   |
| 25   | 761.39000000  | 5.29270000   |
| 26   | 787.89390000  | 10.74710000  |
| 27   | 811.71130000  | 18.95330000  |
| 28   | 845.94390000  | 6.25930000   |
| 29   | 860.08700000  | 25.87050000  |
| 30   | 907.27120000  | 44.83280000  |
| 31   | 944.43330000  | 18.22640000  |
| 32   | 967.82890000  | 11.34480000  |
| 33   | 971.60060000  | 9.00260000   |
| 34   | 998.29190000  | 12.50990000  |
| 35   | 1014.83520000 | 5.34780000   |
| 36   | 1025.09350000 | 74.63140000  |
| 37   | 1051.04690000 | 26.44270000  |
| 38   | 1075.59790000 | 0.41760000   |
| 39   | 1102.17430000 | 32.58610000  |
| 40   | 1138.66980000 | 3.16600000   |
| 41   | 1149.67750000 | 2.89600000   |
| 42   | 1160.40300000 | 10.25820000  |
| 43   | 1212.35860000 | 7.12520000   |

|    |               |               |
|----|---------------|---------------|
| 44 | 1241.41670000 | 27.18730000   |
| 45 | 1245.13520000 | 29.55300000   |
| 46 | 1260.45710000 | 22.64200000   |
| 47 | 1276.65590000 | 35.74440000   |
| 48 | 1295.09020000 | 5.75520000    |
| 49 | 1302.51620000 | 4.02870000    |
| 50 | 1330.33290000 | 23.74820000   |
| 51 | 1348.43330000 | 8.26450000    |
| 52 | 1377.27630000 | 15.51690000   |
| 53 | 1416.07070000 | 3.21240000    |
| 54 | 1439.72050000 | 7.79810000    |
| 55 | 1447.56840000 | 16.65950000   |
| 56 | 1471.33810000 | 20.65460000   |
| 57 | 1475.71580000 | 0.97590000    |
| 58 | 1484.15750000 | 32.18950000   |
| 59 | 1491.96580000 | 3.07480000    |
| 60 | 1496.99390000 | 2.38250000    |
| 61 | 1507.75330000 | 5.76820000    |
| 62 | 1508.21470000 | 22.58660000   |
| 63 | 1514.33270000 | 174.38820000  |
| 64 | 1524.30760000 | 46.24340000   |
| 65 | 1532.47850000 | 57.73500000   |
| 66 | 1539.28060000 | 46.44090000   |
| 67 | 1610.86680000 | 39.64250000   |
| 68 | 1813.82340000 | 384.11940000  |
| 69 | 2804.95310000 | 1787.61870000 |
| 70 | 3044.49610000 | 6.37460000    |
| 71 | 3079.29120000 | 2.90640000    |
| 72 | 3083.29260000 | 1.60810000    |
| 73 | 3086.76770000 | 6.85060000    |
| 74 | 3090.80170000 | 3.35800000    |
| 75 | 3116.47190000 | 7.39570000    |
| 76 | 3160.45830000 | 0.77990000    |
| 77 | 3166.77550000 | 1.74500000    |
| 78 | 3169.88680000 | 4.06310000    |
| 79 | 3187.95300000 | 3.47700000    |
| 80 | 3199.14050000 | 4.76190000    |
| 81 | 3209.86890000 | 9.67640000    |
| 82 | 3265.82540000 | 6.57050000    |
| 83 | 3275.41900000 | 3.01480000    |
| 84 | 3638.92670000 | 134.35500000  |

## S24. HERCYNINE (CONFORMER A) IN MEOH

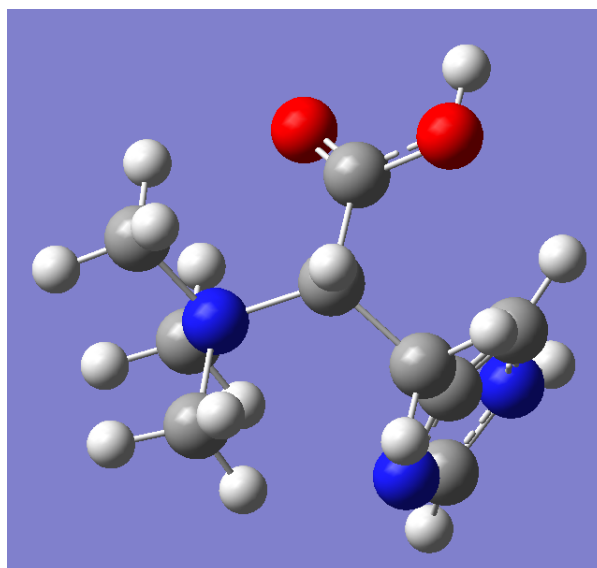

```

Route : # opt freq b3lyp/cc-pvtz scrf=(iefpcm,solvent=methanol) geom=connectiv
       : ity empiricaldispersion=gd3bj int=ultrafine pop=regular
SMILES : C[N](C)(C)C(Cc1c[nH]cn1)C(=O)O
Formula : C9H16N3O2+
Charge : 1
Multiplicity : 1
Energy : -667.44662452 a.u.
Gibbs Energy : -667.22608900 a.u.
Number of imaginary frequencies : 1

```

## S24.1. Cartesian Co-ordinates (XYZ format)

30

```

C 2.30900311 1.00717103 -0.00692600
C 1.57441401 -0.01271200 0.53988898
C 3.13773489 -0.94262600 -0.61380100
N 3.29622197 0.39759800 -0.74032003
H 4.01821089 0.86372399 -1.26448798
H 2.22697210 2.07571697 0.06742000
N 2.10695195 -1.22764504 0.15384699
C 0.37935600 0.07049100 1.43022299
H 0.47798100 0.92569703 2.09533691
H 0.34036201 -0.80538797 2.07075691
C -0.99672401 0.27296299 0.75292403
H -1.71150696 0.46735701 1.55019701
N -1.57943904 -0.94053602 0.02664800
C -0.97049701 1.52454305 -0.12136600
O -1.13842297 1.58496594 -1.31157696
O -0.71674103 2.58478999 0.65052700
C -1.60730803 -2.10844898 0.97473103
H -0.59463298 -2.44369698 1.15966201
H -2.09022498 -1.80617905 1.89828598
H -2.17384005 -2.90254092 0.50130498

```

```

C -0.81639302 -1.36544204 -1.20392704
H -0.79366702 -0.54138398 -1.90251505
H 0.18383200 -1.65668404 -0.90905201
H -1.34663701 -2.21203494 -1.62783098
C -3.00330400 -0.63382602 -0.36094800
H -3.42705989 -1.52626002 -0.80756301
H -3.55724597 -0.36692700 0.53317702
H -3.00743198 0.17864899 -1.07501197
H -0.68406999 3.37672400 0.09020200
H 3.79073811 -1.65267503 -1.09098005

```

## S24.2. Frequencies

| Mode | IR frequency  | IR intensity |
|------|---------------|--------------|
| 1    | -6.24600000   | 6.09280000   |
| 2    | 38.84960000   | 6.97460000   |
| 3    | 67.56130000   | 4.00950000   |
| 4    | 98.12530000   | 1.42800000   |
| 5    | 117.51230000  | 8.39410000   |
| 6    | 209.18690000  | 11.98490000  |
| 7    | 226.05530000  | 0.60950000   |
| 8    | 241.59530000  | 3.88120000   |
| 9    | 252.69580000  | 8.69920000   |
| 10   | 280.66770000  | 4.59700000   |
| 11   | 296.06970000  | 7.68700000   |
| 12   | 329.80450000  | 1.64960000   |
| 13   | 340.09740000  | 10.95920000  |
| 14   | 360.30090000  | 14.66280000  |
| 15   | 403.19280000  | 3.26820000   |
| 16   | 428.91520000  | 1.26750000   |
| 17   | 437.80390000  | 0.57300000   |
| 18   | 513.29660000  | 13.05080000  |
| 19   | 549.33740000  | 26.30590000  |
| 20   | 583.64980000  | 127.31930000 |
| 21   | 598.13290000  | 144.80620000 |
| 22   | 635.45420000  | 29.88480000  |
| 23   | 658.03210000  | 41.99090000  |
| 24   | 676.22070000  | 4.46330000   |
| 25   | 718.44220000  | 25.61100000  |
| 26   | 725.60780000  | 11.27930000  |
| 27   | 791.64620000  | 19.07730000  |
| 28   | 808.73110000  | 26.43800000  |
| 29   | 851.86150000  | 24.10780000  |
| 30   | 868.86650000  | 5.14780000   |
| 31   | 889.46220000  | 65.62150000  |
| 32   | 952.73400000  | 33.91510000  |
| 33   | 959.50380000  | 1.95010000   |
| 34   | 962.18690000  | 2.71010000   |
| 35   | 983.81290000  | 39.17460000  |
| 36   | 1008.01610000 | 33.39920000  |
| 37   | 1032.03520000 | 33.64370000  |
| 38   | 1086.29140000 | 0.83510000   |
| 39   | 1101.84520000 | 44.58100000  |
| 40   | 1138.74400000 | 208.93370000 |
| 41   | 1143.17930000 | 7.10440000   |
| 42   | 1154.26080000 | 8.71950000   |
| 43   | 1163.41350000 | 173.23230000 |
| 44   | 1216.74400000 | 17.91000000  |
| 45   | 1246.30930000 | 3.54060000   |
| 46   | 1260.42800000 | 4.79650000   |
| 47   | 1263.21180000 | 1.85360000   |
| 48   | 1292.35860000 | 1.94560000   |

|    |               |              |
|----|---------------|--------------|
| 49 | 1301.11570000 | 3.02370000   |
| 50 | 1318.08050000 | 0.42870000   |
| 51 | 1342.28700000 | 28.50920000  |
| 52 | 1363.92480000 | 10.29090000  |
| 53 | 1403.25620000 | 15.19140000  |
| 54 | 1427.12080000 | 33.03940000  |
| 55 | 1450.36510000 | 2.18380000   |
| 56 | 1454.31340000 | 11.18190000  |
| 57 | 1457.56400000 | 31.82710000  |
| 58 | 1473.13570000 | 27.37700000  |
| 59 | 1482.96630000 | 4.09980000   |
| 60 | 1493.01810000 | 6.26910000   |
| 61 | 1496.72250000 | 1.87110000   |
| 62 | 1500.33570000 | 7.05890000   |
| 63 | 1508.88390000 | 51.66990000  |
| 64 | 1522.84920000 | 8.48010000   |
| 65 | 1524.20700000 | 56.34690000  |
| 66 | 1535.53260000 | 70.32330000  |
| 67 | 1593.58530000 | 9.41850000   |
| 68 | 1797.07760000 | 430.68120000 |
| 69 | 3087.34960000 | 1.91470000   |
| 70 | 3090.00820000 | 8.53200000   |
| 71 | 3090.65090000 | 11.67020000  |
| 72 | 3094.02820000 | 25.92340000  |
| 73 | 3099.83760000 | 11.03310000  |
| 74 | 3134.32870000 | 5.34860000   |
| 75 | 3173.21650000 | 1.87840000   |
| 76 | 3178.25750000 | 11.46600000  |
| 77 | 3180.18400000 | 6.24640000   |
| 78 | 3193.30700000 | 0.69370000   |
| 79 | 3204.39700000 | 1.41900000   |
| 80 | 3215.79280000 | 12.04860000  |
| 81 | 3255.81530000 | 0.70150000   |
| 82 | 3275.32510000 | 0.96250000   |
| 83 | 3641.75120000 | 151.83230000 |
| 84 | 3721.69480000 | 177.71570000 |

## S25. HERCYNINE (CONFORMER B) IN MEOH

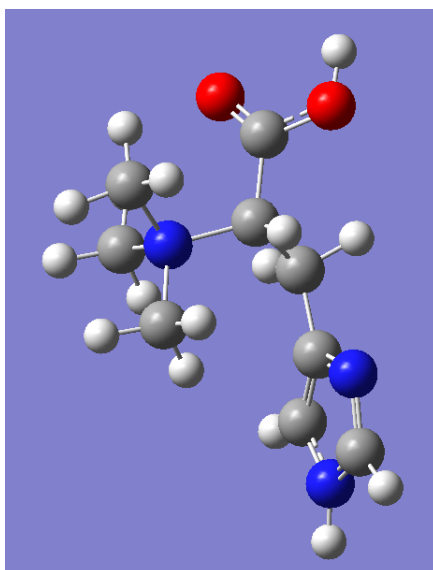

```

Route : # opt freq b3lyp/cc-pvtz scrf=(solvent=methanol) geom=connectivity emp
       : iricaldispersion=gd3bj int=ultrafine pop=regular
SMILES : C[N](C)(C)C(Cc1c[nH]cn1)C(=O)O
Formula : C9H16N3O2+
Charge : 1
Multiplicity : 1
Energy : -667.44640776 a.u.
Gibbs Energy : -667.22863600 a.u.
Number of imaginary frequencies : 0

```

## S25.1. Cartesian Co-ordinates (XYZ format)

30

```

C -2.58108807 -0.07807300 1.25624895
C -1.66607797 0.46631199 0.39542899
C -3.41831589 0.05509400 -0.77876502
N -3.69354105 -0.33352500 0.49077901
H -4.55738592 -0.73480201 0.81621599
H -2.54075003 -0.29973200 2.30672002
N -2.20037794 0.54567897 -0.87315601
C -0.28343499 0.94539601 0.68092299
H -0.01468100 0.76788199 1.71938598
H -0.25132200 2.02787590 0.54088998
C 0.80252099 0.39740601 -0.26674399
H 0.45364800 0.50057799 -1.28990304
N 1.13974404 -1.08889699 -0.10840000
C 2.03456807 1.27738094 -0.08193900
O 2.91412497 1.10108805 0.72249401
O 1.96216905 2.32670689 -0.90201199
C 0.00334500 -1.92641497 -0.63754398
H -0.86884999 -1.77992105 -0.01603000
H -0.20664699 -1.62652504 -1.65794396
H 0.31974500 -2.96338201 -0.60560799

```

C 1.40093398 -1.48372602 1.31885302  
 H 2.18283701 -0.85143399 1.71855605  
 H 0.48513299 -1.37790799 1.88743401  
 H 1.71119797 -2.52296805 1.31963503  
 C 2.35196304 -1.41404605 -0.94288999  
 H 2.48250103 -2.49036789 -0.93676603  
 H 2.17550111 -1.06805396 -1.95631695  
 H 3.22110510 -0.93196303 -0.51570702  
 H 2.70194507 2.92611909 -0.71078402  
 H -4.12967205 -0.03897200 -1.58107996

## S25.2. Frequencies

| Mode | IR frequency  | IR intensity |
|------|---------------|--------------|
| 1    | 21.18200000   | 1.04190000   |
| 2    | 51.26710000   | 6.28870000   |
| 3    | 69.24470000   | 5.39710000   |
| 4    | 74.01210000   | 5.36170000   |
| 5    | 110.30500000  | 6.88610000   |
| 6    | 179.73200000  | 4.33700000   |
| 7    | 218.39030000  | 2.03070000   |
| 8    | 242.79440000  | 10.72270000  |
| 9    | 253.59700000  | 2.27380000   |
| 10   | 281.04770000  | 1.52300000   |
| 11   | 287.64220000  | 5.05830000   |
| 12   | 309.81840000  | 7.32740000   |
| 13   | 347.31640000  | 8.98750000   |
| 14   | 352.76370000  | 15.35340000  |
| 15   | 369.30110000  | 6.99380000   |
| 16   | 419.45480000  | 0.63910000   |
| 17   | 437.78070000  | 1.81810000   |
| 18   | 479.27330000  | 4.84430000   |
| 19   | 559.55860000  | 13.83390000  |
| 20   | 577.00490000  | 125.19820000 |
| 21   | 591.62280000  | 159.43950000 |
| 22   | 655.03120000  | 65.91110000  |
| 23   | 662.27830000  | 7.34670000   |
| 24   | 683.54660000  | 32.30000000  |
| 25   | 717.86670000  | 9.36740000   |
| 26   | 752.14610000  | 2.73720000   |
| 27   | 790.20830000  | 27.13590000  |
| 28   | 800.06310000  | 13.53000000  |
| 29   | 852.68470000  | 45.98160000  |
| 30   | 861.33930000  | 8.34980000   |
| 31   | 910.44410000  | 38.57830000  |
| 32   | 945.83080000  | 41.45830000  |
| 33   | 961.55680000  | 5.45230000   |
| 34   | 971.25770000  | 23.34790000  |
| 35   | 988.80030000  | 9.64920000   |
| 36   | 1011.59130000 | 74.69380000  |
| 37   | 1047.69830000 | 4.06390000   |
| 38   | 1084.29180000 | 0.09160000   |
| 39   | 1097.10390000 | 41.29110000  |
| 40   | 1137.61930000 | 12.21710000  |
| 41   | 1138.90400000 | 128.13050000 |
| 42   | 1151.34460000 | 36.98740000  |
| 43   | 1163.78710000 | 189.37990000 |
| 44   | 1208.81230000 | 9.25590000   |
| 45   | 1253.84870000 | 12.59410000  |
| 46   | 1256.54450000 | 22.75230000  |
| 47   | 1275.24750000 | 1.57830000   |
| 48   | 1292.58420000 | 4.56590000   |

|    |               |              |
|----|---------------|--------------|
| 49 | 1298.21250000 | 3.73630000   |
| 50 | 1310.13190000 | 3.91760000   |
| 51 | 1342.22230000 | 8.74760000   |
| 52 | 1359.38090000 | 70.89270000  |
| 53 | 1387.85690000 | 24.92210000  |
| 54 | 1432.97070000 | 39.61920000  |
| 55 | 1450.52740000 | 8.87090000   |
| 56 | 1454.85850000 | 1.36450000   |
| 57 | 1460.42520000 | 52.62920000  |
| 58 | 1470.67880000 | 13.47560000  |
| 59 | 1481.27730000 | 3.10920000   |
| 60 | 1490.40790000 | 17.40260000  |
| 61 | 1495.12380000 | 14.28030000  |
| 62 | 1500.43190000 | 8.34370000   |
| 63 | 1509.93790000 | 32.61000000  |
| 64 | 1518.27410000 | 28.90660000  |
| 65 | 1521.38210000 | 28.66680000  |
| 66 | 1530.11180000 | 80.84350000  |
| 67 | 1602.32510000 | 11.00240000  |
| 68 | 1792.12630000 | 470.35760000 |
| 69 | 3046.72320000 | 10.54550000  |
| 70 | 3087.84290000 | 2.37770000   |
| 71 | 3094.83200000 | 9.33430000   |
| 72 | 3098.14520000 | 10.11360000  |
| 73 | 3112.67600000 | 7.76190000   |
| 74 | 3126.27200000 | 2.71380000   |
| 75 | 3173.07200000 | 0.75800000   |
| 76 | 3181.64980000 | 5.03800000   |
| 77 | 3183.50460000 | 4.45870000   |
| 78 | 3202.81100000 | 0.47370000   |
| 79 | 3205.96720000 | 3.53840000   |
| 80 | 3206.93720000 | 1.93850000   |
| 81 | 3254.62270000 | 0.78050000   |
| 82 | 3275.02350000 | 1.06730000   |
| 83 | 3641.80910000 | 154.59500000 |
| 84 | 3713.06540000 | 171.95110000 |



## S26. HERCYNINE (CONFORMER C) IN MEOH

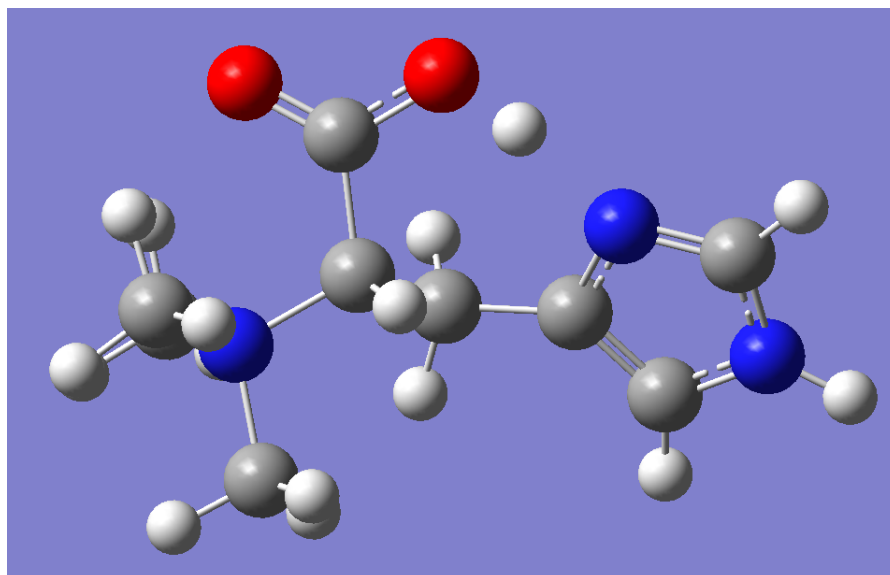

```

Route                : # opt freq b3lyp/cc-pvtz scrf=(solvent=methanol) geom=connectivity emp
                    : iricaldispersion=gd3bj int=ultrafine pop=regular
SMILES               : C[N+](C)(C)C(Cc1c[nH]cn1)C(=O)O
Formula              : C9H16N3O2+
Charge               : 1
Multiplicity         : 1
Energy               : -667.45576054 a.u.
Gibbs Energy        : -667.23628500 a.u.
Number of imaginary frequencies : 0

```

## S26.1. Cartesian Co-ordinates (XYZ format)

30

```

C  2.75465393 -1.28881204 -0.44597399
C  1.73173499 -0.38568500 -0.39089400
C  3.43010306  0.54733503  0.58123302
N  3.82115889 -0.67593098  0.17054600
H  2.81758595 -2.28011608 -0.85377097
N  2.16897798  0.75172901  0.25552201
C  0.33007801 -0.48424199 -0.90060902
H  0.12253700 -1.52550995 -1.12149501
H  0.22578201  0.05494000 -1.84299505
C -0.68127102  0.07990200  0.13064601
H -0.25790501 -0.01638400  1.12777197
N -1.97885501 -0.72579902  0.20127600
C -0.91351998  1.58304906 -0.13253599
O -1.96925199  2.04130602 -0.51021397
O  0.14227900  2.33551598  0.06825600
C -1.66156900 -2.11682510  0.68287599
H -1.04334402 -2.63132811 -0.04046400
H -1.14943004 -2.04845095  1.63691700
H -2.59908700 -2.64848709  0.79932499
C -2.67654610 -0.81568903 -1.12862206

```

H -2.91115499 0.18649399 -1.46047401  
 H -2.02653790 -1.31647599 -1.83664894  
 H -3.58125997 -1.39749897 -0.98791200  
 C -2.91429496 -0.11895000 1.21859002  
 H -3.75943494 -0.78935897 1.32911503  
 H -2.38437700 -0.03133600 2.16172409  
 H -3.23754501 0.84923500 0.86612397  
 H 1.00872397 1.80527604 0.26252401  
 H 4.73686695 -1.07454002 0.29898199  
 H 4.07369900 1.23566997 1.09876502

## S26.2. Frequencies

| Mode | IR frequency  | IR intensity |
|------|---------------|--------------|
| 1    | 45.96250000   | 2.06070000   |
| 2    | 72.73020000   | 1.15730000   |
| 3    | 90.86300000   | 1.76710000   |
| 4    | 113.75640000  | 4.27160000   |
| 5    | 161.49540000  | 10.00800000  |
| 6    | 202.66350000  | 9.38190000   |
| 7    | 228.65620000  | 14.24330000  |
| 8    | 244.33490000  | 7.67620000   |
| 9    | 257.69530000  | 8.82570000   |
| 10   | 262.15170000  | 14.40400000  |
| 11   | 280.56470000  | 5.79040000   |
| 12   | 322.05030000  | 14.62930000  |
| 13   | 332.76130000  | 17.40750000  |
| 14   | 364.70050000  | 6.29510000   |
| 15   | 376.50390000  | 7.15380000   |
| 16   | 429.41080000  | 1.90580000   |
| 17   | 438.77980000  | 1.43360000   |
| 18   | 487.38010000  | 4.35040000   |
| 19   | 555.97270000  | 7.75700000   |
| 20   | 598.67050000  | 140.27650000 |
| 21   | 657.56410000  | 4.42980000   |
| 22   | 674.89660000  | 28.49150000  |
| 23   | 683.56200000  | 8.38870000   |
| 24   | 730.28430000  | 1.53780000   |
| 25   | 764.03280000  | 16.04550000  |
| 26   | 794.21310000  | 16.74680000  |
| 27   | 816.47970000  | 28.36330000  |
| 28   | 851.84960000  | 9.44290000   |
| 29   | 856.78660000  | 38.24950000  |
| 30   | 913.96980000  | 51.83050000  |
| 31   | 946.02670000  | 34.76300000  |
| 32   | 967.47920000  | 11.01930000  |
| 33   | 975.39480000  | 22.53660000  |
| 34   | 1006.21710000 | 19.15150000  |
| 35   | 1021.26750000 | 17.42990000  |
| 36   | 1042.40380000 | 18.49600000  |
| 37   | 1067.71090000 | 159.28050000 |
| 38   | 1082.30350000 | 0.37100000   |
| 39   | 1097.42280000 | 63.68570000  |
| 40   | 1142.29890000 | 6.64670000   |
| 41   | 1153.44950000 | 4.76520000   |
| 42   | 1161.45540000 | 16.83830000  |
| 43   | 1215.56430000 | 26.84700000  |
| 44   | 1242.70550000 | 133.09880000 |
| 45   | 1248.28660000 | 28.80550000  |
| 46   | 1259.84000000 | 37.71640000  |
| 47   | 1275.44930000 | 52.85910000  |
| 48   | 1296.66010000 | 8.58180000   |

|    |               |               |
|----|---------------|---------------|
| 49 | 1303.44120000 | 11.62920000   |
| 50 | 1334.07780000 | 43.72710000   |
| 51 | 1354.61600000 | 13.74360000   |
| 52 | 1378.50800000 | 25.06480000   |
| 53 | 1425.55210000 | 8.94590000    |
| 54 | 1447.51490000 | 4.38280000    |
| 55 | 1451.45830000 | 21.54330000   |
| 56 | 1471.15760000 | 36.22280000   |
| 57 | 1474.77940000 | 3.17670000    |
| 58 | 1484.65930000 | 25.91750000   |
| 59 | 1489.81710000 | 5.47220000    |
| 60 | 1493.71920000 | 15.27470000   |
| 61 | 1504.08320000 | 13.86130000   |
| 62 | 1507.36940000 | 17.70590000   |
| 63 | 1521.86890000 | 53.76280000   |
| 64 | 1526.90550000 | 197.65940000  |
| 65 | 1532.10300000 | 127.36110000  |
| 66 | 1539.30690000 | 183.86520000  |
| 67 | 1616.69250000 | 97.79470000   |
| 68 | 1775.56810000 | 717.26450000  |
| 69 | 2450.67120000 | 3301.42540000 |
| 70 | 3054.24300000 | 13.13490000   |
| 71 | 3091.69380000 | 6.75480000    |
| 72 | 3094.32080000 | 5.44800000    |
| 73 | 3097.99190000 | 10.54860000   |
| 74 | 3100.38200000 | 1.54570000    |
| 75 | 3140.37990000 | 4.88060000    |
| 76 | 3174.27550000 | 2.21390000    |
| 77 | 3180.02960000 | 3.35840000    |
| 78 | 3181.26490000 | 6.07380000    |
| 79 | 3200.72950000 | 4.76140000    |
| 80 | 3209.31040000 | 1.93750000    |
| 81 | 3219.77310000 | 4.59200000    |
| 82 | 3272.36520000 | 3.39170000    |
| 83 | 3284.54910000 | 2.64010000    |
| 84 | 3636.49210000 | 175.12790000  |

## S27. HERCYNINE (CONFORMER A) + 2 MEOH IN MEOH

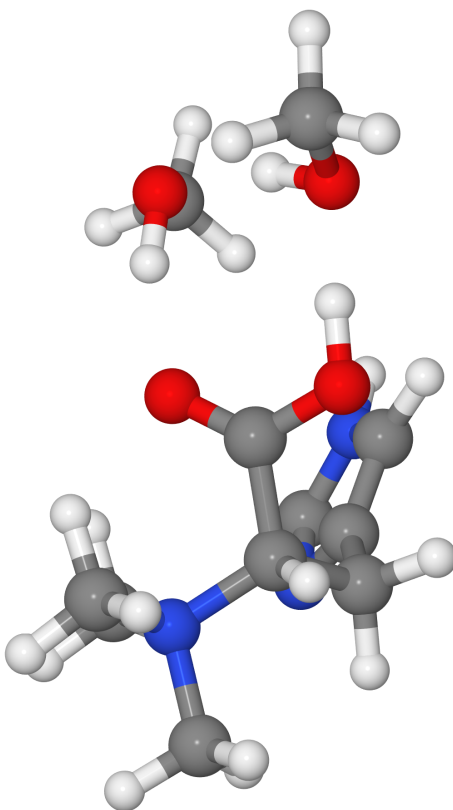

Route : # opt freq b3lyp/cc-pvtz scrf=(solvent=methanol) geom=connectivity emp  
 : iricaldispersion=gd3bj int=ultrafine pop=regular  
 SMILES : C[N](C)(C)C(Cc1c[nH]cn1)C(=O)O.CO.CO  
 Formula : C<sub>11</sub>H<sub>24</sub>N<sub>3</sub>O<sub>4</sub><sup>+</sup>  
 Charge : 1  
 Multiplicity : 1  
 Energy : -899.04546900 a.u.  
 Gibbs Energy : -898.73476100 a.u.  
 Number of imaginary frequencies : 0

## S27.1. Cartesian Co-ordinates (XYZ format)

42

```

C  0.05848500  2.13383603 -1.08497703
C -1.15539205  1.51917803 -0.91522700
C -1.24646401  3.36137104  0.19876800
N -0.01518900  3.30134892 -0.36657101
H  0.70593500  3.99999690 -0.29554299
H  0.93500602  1.85673594 -1.64063001
N -1.96245098  2.30239201 -0.11292900
C -1.62441504  0.22455500 -1.49609005
H -1.15251601  0.07996600 -2.46531892
H -2.69265199  0.27458799 -1.68550503
C -1.28802395 -1.07062995 -0.71360999

```

H -1.40103805 -1.90283203 -1.40413105  
N -2.23150611 -1.42475200 0.43755201  
C 0.18310700 -1.02613199 -0.30177701  
O 0.57175702 -0.92590600 0.84886199  
O 0.94113201 -1.07177603 -1.36294103  
C -3.62588692 -1.57785296 -0.10560600  
H -4.00497818 -0.61157900 -0.41165200  
H -3.60650396 -2.26564693 -0.94450700  
H -4.24839020 -1.97559500 0.68835002  
C -2.27098298 -0.40224800 1.54299903  
H -1.28020406 -0.31218699 1.96537197  
H -2.59711790 0.54651397 1.13301897  
H -2.97423410 -0.76155698 2.28701997  
C -1.82412505 -2.75871110 1.00758100  
H -2.55830097 -3.04119301 1.75397396  
H -1.81053901 -3.48837590 0.20410800  
H -0.84645998 -2.66482997 1.45999706  
H 1.94713700 -0.95434499 -1.14583194  
H -1.56438601 4.18614197 0.81273103  
O 3.41153598 -0.73114902 -0.90423799  
H 2.14242291 -0.25685200 1.50931597  
C 4.19966221 -1.92957306 -0.91423601  
O 3.02771711 0.14229600 1.58102703  
C 2.87325406 1.54277301 1.83158398  
H 3.44049191 -0.33401799 0.00071700  
H 3.86444592 1.98916698 1.80991006  
H 4.10684204 -2.37509704 -1.90149105  
H 5.24700880 -1.69432199 -0.72660899  
H 3.84801006 -2.64046192 -0.16479699  
H 2.25196695 2.01743388 1.07038605  
H 2.42861009 1.71527505 2.81312895

**S27.2. Frequencies**

| Mode | IR frequency  | IR intensity |
|------|---------------|--------------|
| 1    | 10.43340000   | 3.34400000   |
| 2    | 19.76640000   | 3.85860000   |
| 3    | 34.37480000   | 2.38300000   |
| 4    | 49.88840000   | 5.90800000   |
| 5    | 52.71020000   | 7.25870000   |
| 6    | 75.11950000   | 1.83130000   |
| 7    | 80.21780000   | 1.01790000   |
| 8    | 87.86920000   | 0.45190000   |
| 9    | 97.91210000   | 1.52000000   |
| 10   | 106.41900000  | 0.51210000   |
| 11   | 110.91220000  | 2.70320000   |
| 12   | 118.93160000  | 9.84950000   |
| 13   | 121.52090000  | 3.46150000   |
| 14   | 125.52280000  | 8.24710000   |
| 15   | 160.96550000  | 3.60330000   |
| 16   | 209.83650000  | 4.10760000   |
| 17   | 219.16990000  | 28.19520000  |
| 18   | 230.53300000  | 21.30150000  |
| 19   | 248.52580000  | 14.13850000  |
| 20   | 256.19280000  | 5.64920000   |
| 21   | 278.40690000  | 6.38090000   |
| 22   | 290.83020000  | 24.62870000  |
| 23   | 302.94780000  | 46.99890000  |
| 24   | 319.24770000  | 7.73740000   |
| 25   | 346.56040000  | 25.52810000  |
| 26   | 380.34300000  | 6.02850000   |
| 27   | 399.11600000  | 73.86840000  |
| 28   | 428.52300000  | 5.16590000   |
| 29   | 439.94610000  | 6.84660000   |
| 30   | 523.33390000  | 20.44740000  |
| 31   | 567.33280000  | 6.78080000   |
| 32   | 593.33730000  | 160.77920000 |
| 33   | 638.68190000  | 98.86230000  |
| 34   | 652.65620000  | 127.74740000 |
| 35   | 682.15050000  | 32.03120000  |
| 36   | 700.49630000  | 56.41000000  |
| 37   | 726.48780000  | 13.10780000  |
| 38   | 729.81610000  | 10.79620000  |
| 39   | 789.39080000  | 16.56100000  |
| 40   | 824.85840000  | 44.80220000  |
| 41   | 851.33090000  | 22.32670000  |
| 42   | 868.17610000  | 16.07300000  |
| 43   | 896.42580000  | 46.68850000  |
| 44   | 935.40940000  | 67.77110000  |
| 45   | 952.90080000  | 40.48360000  |
| 46   | 961.54740000  | 4.03770000   |
| 47   | 965.34190000  | 7.14440000   |
| 48   | 983.65830000  | 26.91090000  |
| 49   | 1012.29020000 | 36.68320000  |
| 50   | 1017.52120000 | 234.57640000 |
| 51   | 1030.66420000 | 22.17420000  |
| 52   | 1041.31730000 | 113.29890000 |
| 53   | 1083.92440000 | 0.58310000   |
| 54   | 1100.86580000 | 48.99910000  |
| 55   | 1115.81810000 | 28.67650000  |
| 56   | 1130.73470000 | 43.45890000  |
| 57   | 1145.15730000 | 14.91340000  |
| 58   | 1148.13710000 | 9.67180000   |
| 59   | 1149.25020000 | 2.41770000   |
| 60   | 1158.09200000 | 54.61900000  |

|     |               |               |
|-----|---------------|---------------|
| 61  | 1180.85130000 | 1.46810000    |
| 62  | 1196.81400000 | 43.82100000   |
| 63  | 1213.35680000 | 72.74500000   |
| 64  | 1246.93620000 | 81.56880000   |
| 65  | 1249.53460000 | 35.50150000   |
| 66  | 1259.19030000 | 6.63350000    |
| 67  | 1287.28720000 | 38.47250000   |
| 68  | 1298.70150000 | 8.03570000    |
| 69  | 1313.34040000 | 179.87120000  |
| 70  | 1322.82150000 | 58.32080000   |
| 71  | 1366.58720000 | 14.55230000   |
| 72  | 1395.45430000 | 42.01700000   |
| 73  | 1414.71550000 | 26.71820000   |
| 74  | 1429.27370000 | 49.72210000   |
| 75  | 1445.66460000 | 0.91130000    |
| 76  | 1448.02390000 | 82.16000000   |
| 77  | 1456.02800000 | 19.66410000   |
| 78  | 1458.01120000 | 32.08600000   |
| 79  | 1467.98970000 | 34.23810000   |
| 80  | 1473.82290000 | 7.26820000    |
| 81  | 1477.90310000 | 4.61360000    |
| 82  | 1478.83510000 | 17.57880000   |
| 83  | 1489.99210000 | 5.53410000    |
| 84  | 1490.59470000 | 7.88880000    |
| 85  | 1490.91920000 | 16.41000000   |
| 86  | 1492.54020000 | 0.58420000    |
| 87  | 1497.47080000 | 4.99670000    |
| 88  | 1503.22080000 | 13.64750000   |
| 89  | 1506.68460000 | 10.96560000   |
| 90  | 1510.05190000 | 53.78330000   |
| 91  | 1520.65520000 | 53.43730000   |
| 92  | 1523.48360000 | 26.57760000   |
| 93  | 1533.63540000 | 78.83210000   |
| 94  | 1541.26660000 | 12.66110000   |
| 95  | 1591.15580000 | 8.98290000    |
| 96  | 1723.19100000 | 520.50840000  |
| 97  | 2462.05780000 | 3623.05880000 |
| 98  | 3021.62880000 | 136.10360000  |
| 99  | 3027.20020000 | 29.68560000   |
| 100 | 3080.04100000 | 52.80620000   |
| 101 | 3084.44210000 | 9.85170000    |
| 102 | 3086.32810000 | 23.90960000   |
| 103 | 3090.64950000 | 45.44060000   |
| 104 | 3091.32450000 | 8.66190000    |
| 105 | 3092.41660000 | 12.28190000   |
| 106 | 3105.86800000 | 10.00800000   |
| 107 | 3120.80220000 | 40.23240000   |
| 108 | 3125.65000000 | 51.21080000   |
| 109 | 3134.36330000 | 5.40870000    |
| 110 | 3169.60090000 | 3.21690000    |
| 111 | 3172.86590000 | 8.37580000    |
| 112 | 3177.60170000 | 6.88440000    |
| 113 | 3197.25650000 | 3.03480000    |
| 114 | 3206.35110000 | 2.83100000    |
| 115 | 3211.21660000 | 7.77240000    |
| 116 | 3255.72140000 | 0.72060000    |
| 117 | 3276.11440000 | 1.53710000    |
| 118 | 3290.62800000 | 1341.44490000 |
| 119 | 3591.12750000 | 868.12800000  |
| 120 | 3644.56830000 | 152.13740000  |

## S28. HERCYNINE (CONFORMER B) + 2 MEOH IN MEOH

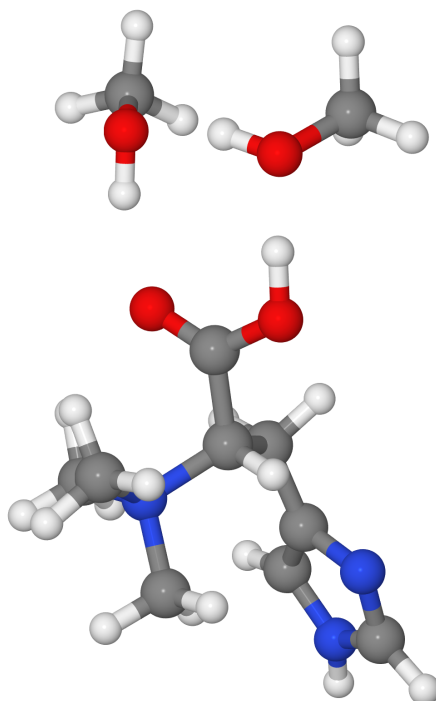

Route : # opt freq b3lyp/cc-pvtz geom=connectivity empiricaldispersion=gd3bj i  
 : nt=ultrafine pop=regular scrf=(solvent=methanol)  
 SMILES : C[N](C)(C)C(Cc1c[nH]cn1)C(=O)O.CO.CO  
 Formula : C<sub>11</sub>H<sub>24</sub>N<sub>3</sub>O<sub>4</sub><sup>+</sup>  
 Charge : 1  
 Multiplicity : 1  
 Energy : -899.04400660 a.u.  
 Gibbs Energy : -898.73410100 a.u.  
 Number of imaginary frequencies : 0

## S28.1. Cartesian Co-ordinates (XYZ format)

42

```

C -3.06402707 -0.49913701 1.45354998
C -2.25429201 0.11043500 0.53270698
C -4.24564314 0.19860700 -0.27164301
N -4.33098412 -0.43389699 0.92483902
H -5.17041588 -0.78808200 1.35266495
H -2.85962796 -0.95713198 2.40375209
N -3.00421906 0.54364800 -0.54082501
C -0.78121197 0.33065400 0.58551598
H -0.35866901 -0.07596500 1.50112796
H -0.58701301 1.40532100 0.61228800
C 0.00499100 -0.17215000 -0.63931400
H -0.47019899 0.19815800 -1.54166996
N 0.05919000 -1.69538105 -0.81794202

```



C 1.40163100 0.44026500 -0.53801000  
O 2.28329611 -0.04830900 0.15064099  
O 1.47682095 1.55411696 -1.20985198  
C -1.27084601 -2.19343710 -1.32172894  
H -2.02490711 -2.02391195 -0.56614500  
H -1.52271497 -1.66038704 -2.23160791  
H -1.16921401 -3.25470495 -1.52146900  
C 0.39328301 -2.42621899 0.45236900  
H 1.31371999 -2.02312398 0.85385001  
H -0.42415401 -2.30532694 1.15291703  
H 0.50954598 -3.47656989 0.20694800  
C 1.08590400 -2.03073192 -1.86841595  
H 0.99269402 -3.08487010 -2.10464406  
H 0.88430703 -1.43365896 -2.75227094  
H 2.07434392 -1.82227802 -1.48054695  
H 2.36998200 2.05951691 -1.06574595  
H -5.10499716 0.37945300 -0.89412099  
O 3.61930609 2.87353802 -0.87828499  
H 3.96462703 0.53276902 0.57509601  
O 4.76460409 1.07065594 0.71733999  
H 4.18792677 2.31504297 -0.29313901  
C 3.37695003 4.13307285 -0.23571800  
H 4.31478977 4.66687822 -0.08467800  
H 2.73695397 4.71815014 -0.89131701  
H 2.87782788 3.99862695 0.72535700  
C 4.84701490 1.39758897 2.10833812  
H 5.69078588 2.07160306 2.23546910  
H 3.94017196 1.89576399 2.45750403  
H 5.01611423 0.50250602 2.70924306

**S28.2. Frequencies**

| Mode | IR frequency  | IR intensity |
|------|---------------|--------------|
| 1    | 8.59400000    | 3.52880000   |
| 2    | 18.44930000   | 2.69440000   |
| 3    | 24.36710000   | 0.66560000   |
| 4    | 48.93210000   | 0.96410000   |
| 5    | 58.92430000   | 1.88050000   |
| 6    | 72.47640000   | 4.10380000   |
| 7    | 74.16980000   | 3.70910000   |
| 8    | 78.00690000   | 1.08610000   |
| 9    | 88.11500000   | 9.07170000   |
| 10   | 109.49900000  | 0.99870000   |
| 11   | 114.36460000  | 1.64470000   |
| 12   | 119.71160000  | 1.68200000   |
| 13   | 125.24950000  | 2.37660000   |
| 14   | 149.26670000  | 2.30160000   |
| 15   | 163.84820000  | 19.51050000  |
| 16   | 198.19470000  | 8.32060000   |
| 17   | 218.80240000  | 35.91490000  |
| 18   | 231.74360000  | 10.52730000  |
| 19   | 249.94050000  | 12.29770000  |
| 20   | 271.11370000  | 3.33640000   |
| 21   | 276.91280000  | 19.14710000  |
| 22   | 282.94970000  | 17.95360000  |
| 23   | 293.19500000  | 35.04650000  |
| 24   | 327.19380000  | 19.62680000  |
| 25   | 357.03730000  | 33.30170000  |
| 26   | 369.50600000  | 4.80300000   |
| 27   | 389.82400000  | 78.78370000  |
| 28   | 423.26300000  | 9.98980000   |
| 29   | 439.37130000  | 20.64920000  |
| 30   | 485.90040000  | 10.56990000  |
| 31   | 579.12870000  | 8.64090000   |
| 32   | 580.59310000  | 157.62730000 |
| 33   | 655.17080000  | 91.72640000  |
| 34   | 659.04120000  | 102.43090000 |
| 35   | 675.65160000  | 9.25300000   |
| 36   | 710.36790000  | 28.13230000  |
| 37   | 723.62900000  | 27.36190000  |
| 38   | 758.10380000  | 12.61720000  |
| 39   | 792.43460000  | 30.24030000  |
| 40   | 812.53110000  | 9.19260000   |
| 41   | 852.61940000  | 51.64230000  |
| 42   | 859.65110000  | 3.86670000   |
| 43   | 913.67240000  | 102.60030000 |
| 44   | 926.88530000  | 115.05370000 |
| 45   | 948.06110000  | 78.04730000  |
| 46   | 961.49710000  | 3.53590000   |
| 47   | 974.84800000  | 24.47380000  |
| 48   | 989.54710000  | 16.47080000  |
| 49   | 1016.03420000 | 131.06210000 |
| 50   | 1019.52130000 | 29.83590000  |
| 51   | 1035.93880000 | 169.03800000 |
| 52   | 1049.76220000 | 1.17490000   |
| 53   | 1083.10160000 | 0.02880000   |
| 54   | 1097.99050000 | 47.59810000  |
| 55   | 1117.10140000 | 20.54850000  |
| 56   | 1133.43130000 | 48.63970000  |
| 57   | 1137.62640000 | 10.19400000  |
| 58   | 1143.82530000 | 11.40240000  |
| 59   | 1151.55510000 | 2.49220000   |
| 60   | 1158.22390000 | 63.50330000  |

|     |               |               |
|-----|---------------|---------------|
| 61  | 1180.74410000 | 1.49610000    |
| 62  | 1194.29040000 | 39.90580000   |
| 63  | 1205.08120000 | 30.08670000   |
| 64  | 1245.37450000 | 60.87310000   |
| 65  | 1254.52910000 | 12.97480000   |
| 66  | 1274.02410000 | 16.07670000   |
| 67  | 1289.80720000 | 26.20940000   |
| 68  | 1296.96080000 | 3.97660000    |
| 69  | 1311.90780000 | 14.68120000   |
| 70  | 1335.23340000 | 300.92010000  |
| 71  | 1346.67430000 | 93.53120000   |
| 72  | 1389.39960000 | 32.06510000   |
| 73  | 1418.80860000 | 58.41990000   |
| 74  | 1425.52820000 | 55.72340000   |
| 75  | 1448.88750000 | 11.60290000   |
| 76  | 1450.84460000 | 0.24650000    |
| 77  | 1461.24850000 | 51.89550000   |
| 78  | 1467.54740000 | 54.01680000   |
| 79  | 1471.58650000 | 14.09990000   |
| 80  | 1475.15720000 | 1.29180000    |
| 81  | 1478.83460000 | 12.84200000   |
| 82  | 1480.35710000 | 5.80260000    |
| 83  | 1489.94200000 | 7.85040000    |
| 84  | 1491.08110000 | 19.07430000   |
| 85  | 1492.34140000 | 7.52660000    |
| 86  | 1493.21760000 | 20.81510000   |
| 87  | 1497.65380000 | 3.35960000    |
| 88  | 1504.88350000 | 11.30690000   |
| 89  | 1508.70680000 | 20.26730000   |
| 90  | 1510.17570000 | 13.77790000   |
| 91  | 1517.61310000 | 23.65020000   |
| 92  | 1521.68810000 | 27.22820000   |
| 93  | 1532.34860000 | 87.29610000   |
| 94  | 1564.04570000 | 34.18040000   |
| 95  | 1602.25400000 | 10.67110000   |
| 96  | 1715.33500000 | 574.36860000  |
| 97  | 2459.32140000 | 3767.56400000 |
| 98  | 3015.36440000 | 71.76190000   |
| 99  | 3026.80940000 | 65.17390000   |
| 100 | 3042.03690000 | 12.01920000   |
| 101 | 3072.19140000 | 66.02870000   |
| 102 | 3087.61010000 | 4.80880000    |
| 103 | 3090.65900000 | 46.80360000   |
| 104 | 3092.38350000 | 4.51640000    |
| 105 | 3095.95180000 | 13.53090000   |
| 106 | 3111.77940000 | 7.87650000    |
| 107 | 3118.73380000 | 42.77050000   |
| 108 | 3125.52610000 | 51.50110000   |
| 109 | 3135.17300000 | 1.93970000    |
| 110 | 3172.72950000 | 1.96790000    |
| 111 | 3178.23220000 | 2.66840000    |
| 112 | 3180.46540000 | 6.45630000    |
| 113 | 3199.94930000 | 0.53520000    |
| 114 | 3204.46010000 | 2.75570000    |
| 115 | 3207.85060000 | 2.34140000    |
| 116 | 3253.63170000 | 0.79040000    |
| 117 | 3273.42430000 | 1.09580000    |
| 118 | 3287.93540000 | 1262.96440000 |
| 119 | 3579.45830000 | 1045.54620000 |
| 120 | 3643.04650000 | 151.77350000  |

S29. HERCYNINE (CONFORMER C) + 2 MEOH IN MEOH (1<sup>st</sup> CONFORMER)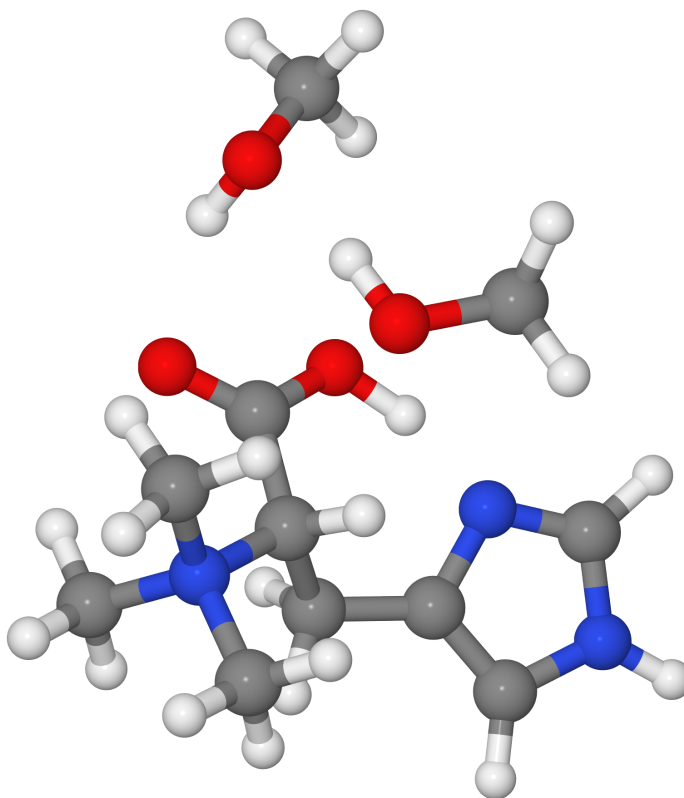

```

Route : # opt freq b3lyp/cc-pvtz geom=connectivity empiricaldispersion=gd3bj i
       : nt=ultrafine pop=regular scrf=(solvent=methanol)
SMILES : C[N](C)(C)C(Cc1c[nH]cn1)C(=O)O.CO.CO
Formula : C11H24N3O4+
Charge : 1
Multiplicity : 1
Energy : -899.04352356 a.u.
Gibbs Energy : -898.73092800 a.u.
Number of imaginary frequencies : 0

```

## S29.1. Cartesian Co-ordinates (XYZ format)

42

```

C 2.65594411 -1.41405499 0.38902301
C 1.75132596 -0.69747800 -0.34055799
C 3.53173995 0.53253299 -0.18634699
N 3.77695608 -0.61903399 0.47002101
H 2.60500193 -2.38508296 0.84446698
N 2.31281495 0.51367402 -0.68826199
C 0.35373300 -1.02697301 -0.75320899
H 0.04034800 -1.91400301 -0.21490499
H 0.31776199 -1.28372598 -1.81259596
C -0.59817499 0.16611400 -0.47662801
H -0.19117101 0.77988899 0.32262099

```

N -1.96604097 -0.26378199 0.05301800  
C -0.67715901 1.08352101 -1.70880103  
O -1.71063006 1.31738603 -2.30966902  
O 0.46112201 1.60439396 -2.08043694  
C -1.77104294 -0.94363201 1.38244200  
H -1.18804002 -1.84684598 1.26310003  
H -1.26811397 -0.25475800 2.05307198  
H -2.75087094 -1.19633198 1.77125001  
C -2.67555499 -1.20034206 -0.88273799  
H -2.81577802 -0.69703001 -1.83032703  
H -2.08413100 -2.10009789 -1.00693905  
H -3.63281202 -1.44976997 -0.43728301  
C -2.84323812 0.94031900 0.31675401  
H -3.70247793 0.59578800 0.88106000  
H -2.26819801 1.66524506 0.88263500  
H -3.15146303 1.36157596 -0.62791699  
H 1.28497601 1.29860306 -1.51884794  
H 4.63359022 -0.85262400 0.94511902  
H 4.24318123 1.33405495 -0.27086800  
H -1.76500106 3.25459909 -2.40187502  
O -1.64808297 4.14561415 -2.03608298  
O -0.65854001 3.28680897 0.41672301  
C 0.65850598 3.78560305 0.61499798  
C -0.68491000 4.83974314 -2.83435297  
H 1.06795704 3.29847097 1.49864995  
H 1.30872297 3.56037402 -0.23450500  
H 0.66226703 4.86635590 0.78175902  
H -1.06220901 5.01188278 -3.84425592  
H -0.50433397 5.80121088 -2.35889912  
H 0.25444600 4.28743982 -2.89148498  
H -1.01920104 3.68347001 -0.40092301

**S29.2. Frequencies**

| Mode | IR frequency  | IR intensity |
|------|---------------|--------------|
| 1    | 25.52170000   | 6.30750000   |
| 2    | 31.77140000   | 2.13740000   |
| 3    | 49.42060000   | 5.61160000   |
| 4    | 61.10580000   | 0.30060000   |
| 5    | 63.73620000   | 2.49920000   |
| 6    | 78.33790000   | 1.10920000   |
| 7    | 81.13150000   | 8.00060000   |
| 8    | 92.32370000   | 1.64020000   |
| 9    | 103.36670000  | 7.25600000   |
| 10   | 108.01950000  | 12.47890000  |
| 11   | 112.88050000  | 3.18250000   |
| 12   | 121.09910000  | 0.58830000   |
| 13   | 131.88910000  | 2.94230000   |
| 14   | 155.66730000  | 8.52900000   |
| 15   | 171.75360000  | 18.35190000  |
| 16   | 175.00890000  | 7.11470000   |
| 17   | 213.00420000  | 30.84730000  |
| 18   | 219.63150000  | 9.48270000   |
| 19   | 236.93300000  | 10.46860000  |
| 20   | 248.14770000  | 9.64570000   |
| 21   | 260.77760000  | 0.84870000   |
| 22   | 263.21410000  | 32.85630000  |
| 23   | 296.31190000  | 11.91940000  |
| 24   | 324.30770000  | 8.64560000   |
| 25   | 341.63530000  | 21.03380000  |
| 26   | 369.36250000  | 10.32800000  |
| 27   | 379.79680000  | 12.88620000  |
| 28   | 433.33490000  | 3.23320000   |
| 29   | 442.43250000  | 1.91110000   |
| 30   | 486.37510000  | 14.89470000  |
| 31   | 558.39040000  | 6.19110000   |
| 32   | 596.85630000  | 190.41630000 |
| 33   | 598.77880000  | 178.49510000 |
| 34   | 653.84440000  | 3.79040000   |
| 35   | 670.07910000  | 31.03640000  |
| 36   | 684.84260000  | 15.73980000  |
| 37   | 729.94480000  | 5.06640000   |
| 38   | 754.12670000  | 43.31700000  |
| 39   | 789.69700000  | 77.65620000  |
| 40   | 810.17050000  | 96.48110000  |
| 41   | 821.93620000  | 170.68030000 |
| 42   | 856.17410000  | 8.34110000   |
| 43   | 857.49540000  | 49.97170000  |
| 44   | 914.90460000  | 44.60500000  |
| 45   | 941.10300000  | 29.47890000  |
| 46   | 969.98390000  | 7.84290000   |
| 47   | 979.89060000  | 17.33870000  |
| 48   | 1011.25660000 | 31.60870000  |
| 49   | 1024.96420000 | 28.84330000  |
| 50   | 1028.73230000 | 93.02980000  |
| 51   | 1045.76080000 | 1.70590000   |
| 52   | 1048.45520000 | 168.75580000 |
| 53   | 1084.02370000 | 0.55320000   |
| 54   | 1097.27000000 | 34.70200000  |
| 55   | 1106.62710000 | 17.75690000  |
| 56   | 1112.41630000 | 196.08270000 |
| 57   | 1136.06890000 | 15.92760000  |
| 58   | 1144.36630000 | 5.38250000   |
| 59   | 1153.36880000 | 9.75700000   |
| 60   | 1163.22660000 | 17.97510000  |

|     |               |               |
|-----|---------------|---------------|
| 61  | 1176.32850000 | 2.24730000    |
| 62  | 1178.84070000 | 0.89150000    |
| 63  | 1212.49580000 | 32.97500000   |
| 64  | 1246.62390000 | 3.95580000    |
| 65  | 1250.55760000 | 99.81650000   |
| 66  | 1260.94910000 | 27.93320000   |
| 67  | 1279.49050000 | 60.73220000   |
| 68  | 1299.28090000 | 14.74750000   |
| 69  | 1303.11520000 | 24.03740000   |
| 70  | 1342.69640000 | 48.18680000   |
| 71  | 1353.69860000 | 36.49920000   |
| 72  | 1376.94540000 | 23.57390000   |
| 73  | 1404.20300000 | 50.28580000   |
| 74  | 1433.11000000 | 9.50930000    |
| 75  | 1449.98110000 | 18.35580000   |
| 76  | 1452.30870000 | 5.32730000    |
| 77  | 1465.18340000 | 27.86340000   |
| 78  | 1473.87090000 | 11.31200000   |
| 79  | 1474.09610000 | 22.81710000   |
| 80  | 1474.78890000 | 15.01920000   |
| 81  | 1479.04130000 | 0.87720000    |
| 82  | 1487.97650000 | 25.52190000   |
| 83  | 1488.27880000 | 13.92700000   |
| 84  | 1488.94480000 | 4.54140000    |
| 85  | 1489.17560000 | 12.38040000   |
| 86  | 1494.12510000 | 13.89790000   |
| 87  | 1505.84080000 | 20.33510000   |
| 88  | 1507.42790000 | 1.01320000    |
| 89  | 1508.92200000 | 13.36350000   |
| 90  | 1514.09140000 | 35.17840000   |
| 91  | 1521.02510000 | 46.33330000   |
| 92  | 1527.41840000 | 276.18350000  |
| 93  | 1539.09400000 | 106.98200000  |
| 94  | 1549.18650000 | 167.43620000  |
| 95  | 1619.88470000 | 120.41760000  |
| 96  | 1749.49860000 | 728.33600000  |
| 97  | 2313.01050000 | 3497.47730000 |
| 98  | 2998.18370000 | 84.30500000   |
| 99  | 3017.48510000 | 83.74830000   |
| 100 | 3046.21180000 | 78.16830000   |
| 101 | 3058.27240000 | 13.22140000   |
| 102 | 3075.14730000 | 55.38050000   |
| 103 | 3090.20330000 | 6.98010000    |
| 104 | 3092.22110000 | 4.63970000    |
| 105 | 3095.60170000 | 54.92620000   |
| 106 | 3097.87820000 | 23.85620000   |
| 107 | 3113.94920000 | 0.51840000    |
| 108 | 3115.54810000 | 40.24550000   |
| 109 | 3143.69130000 | 6.79650000    |
| 110 | 3175.34380000 | 3.19910000    |
| 111 | 3177.64410000 | 2.86960000    |
| 112 | 3183.32270000 | 2.79410000    |
| 113 | 3201.01870000 | 5.70670000    |
| 114 | 3202.93910000 | 1.04830000    |
| 115 | 3224.58820000 | 2.87450000    |
| 116 | 3274.43980000 | 4.04020000    |
| 117 | 3285.37440000 | 2.92060000    |
| 118 | 3487.44680000 | 818.32710000  |
| 119 | 3637.24400000 | 180.90150000  |
| 120 | 3654.83230000 | 530.30510000  |

S30. HERCYNINE (CONFORMER C) + 2 MEOH IN MEOH (2<sup>nd</sup> CONFORMER)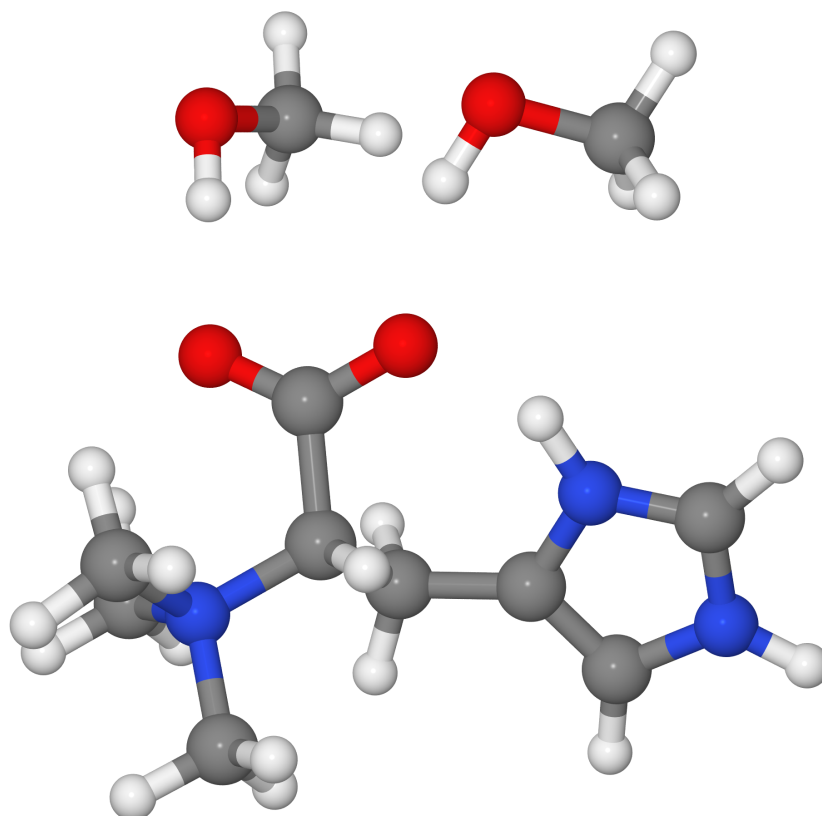

```

Route : # opt freq b3lyp/cc-pvtz geom=connectivity empiricaldispersion=gd3bj i
       : nt=ultrafine pop=regular scrf=(solvent=methanol)
SMILES : C[N](C)(C)C(Cc1c[nH]c[nH+]1)C(=O)[O].CO.CO
Formula : C11H24N3O4+
Charge : 1
Multiplicity : 1
Energy : -899.04260927 a.u.
Gibbs Energy : -898.73007800 a.u.
Number of imaginary frequencies : 1

```

## S30.1. Cartesian Co-ordinates (XYZ format)

42

```

C 2.80160904 -0.95396101 -0.26408800
C 1.70230997 -0.15868101 -0.37330499
C 3.35371804 1.07401204 0.44154301
N 3.81099892 -0.16065501 0.23943201
H 2.95014191 -1.99070895 -0.49710399
N 2.08146691 1.09082997 0.07277300
C 0.32634899 -0.44510701 -0.87250900
H 0.24176399 -1.52334404 -0.95969403
H 0.20944200 -0.04514400 -1.88019395
C -0.77396601 0.14185899 0.04581900
H -0.40672901 0.19580901 1.06688201

```



N -1.99641705 -0.77558500 0.15204801  
C -1.09308505 1.59430003 -0.41574299  
O -2.14103007 1.82368004 -1.03676498  
O -0.18215799 2.41706800 -0.13093500  
C -1.60292006 -2.04284310 0.85928297  
H -0.87325501 -2.58681202 0.27361399  
H -1.19025302 -1.78764796 1.82959294  
H -2.49350095 -2.65013003 0.97887403  
C -2.58471489 -1.12285197 -1.18759501  
H -2.85188699 -0.20132700 -1.68681598  
H -1.85474396 -1.67963505 -1.76399004  
H -3.45860791 -1.74170697 -1.01357996  
C -3.04866409 -0.10593400 0.99877697  
H -3.84740090 -0.82062900 1.16425204  
H -2.59859800 0.17462800 1.94595397  
H -3.41329503 0.76499897 0.47322500  
H 1.37911701 1.85708499 0.11617900  
H 4.75329399 -0.46182799 0.43499801  
H 3.91515493 1.90057397 0.83413702  
H -2.31737709 3.39308810 -1.87139499  
H 0.00483100 4.21910715 -0.41916400  
O -2.40404296 4.18982506 -2.42916107  
O 0.39934000 5.10689592 -0.48505899  
C 1.80476904 4.94631100 -0.38738501  
C -1.35340202 4.15176105 -3.38197207  
H 2.20162511 4.29492378 -1.17350399  
H 2.26368499 5.92821789 -0.49836600  
H 2.10732603 4.53909683 0.58403301  
H -1.39447296 3.25210810 -4.00610495  
H -1.45825696 5.01963186 -4.03337288  
H -0.37073299 4.20113993 -2.90406990

**S30.2. Frequencies**

| Mode | IR frequency  | IR intensity |
|------|---------------|--------------|
| 1    | -5.71230000   | 2.00300000   |
| 2    | 10.60240000   | 0.12350000   |
| 3    | 34.67440000   | 3.62840000   |
| 4    | 42.31820000   | 2.49130000   |
| 5    | 52.06460000   | 1.37790000   |
| 6    | 66.08130000   | 12.23180000  |
| 7    | 75.48230000   | 4.28880000   |
| 8    | 90.64120000   | 0.64940000   |
| 9    | 101.44690000  | 5.81390000   |
| 10   | 102.97410000  | 2.16850000   |
| 11   | 106.17040000  | 0.69150000   |
| 12   | 110.53990000  | 2.91810000   |
| 13   | 117.67430000  | 6.46220000   |
| 14   | 154.96180000  | 16.99210000  |
| 15   | 158.58980000  | 5.33690000   |
| 16   | 176.64360000  | 5.21810000   |
| 17   | 195.95750000  | 2.34670000   |
| 18   | 199.51550000  | 6.93330000   |
| 19   | 229.57890000  | 24.14260000  |
| 20   | 243.52750000  | 3.51410000   |
| 21   | 254.97200000  | 17.65930000  |
| 22   | 270.30490000  | 23.07360000  |
| 23   | 284.30450000  | 1.96720000   |
| 24   | 316.27560000  | 6.20690000   |
| 25   | 343.61330000  | 46.39270000  |
| 26   | 366.87210000  | 4.50130000   |
| 27   | 374.74120000  | 8.08610000   |
| 28   | 426.67880000  | 5.80240000   |
| 29   | 438.15480000  | 5.81810000   |
| 30   | 482.02750000  | 3.33070000   |
| 31   | 558.00640000  | 8.63480000   |
| 32   | 627.09010000  | 71.81720000  |
| 33   | 659.38550000  | 1.08780000   |
| 34   | 681.66260000  | 233.51920000 |
| 35   | 691.51800000  | 36.58210000  |
| 36   | 699.64510000  | 88.96330000  |
| 37   | 718.72430000  | 7.60340000   |
| 38   | 733.94660000  | 49.80700000  |
| 39   | 782.85330000  | 4.65420000   |
| 40   | 811.02780000  | 14.72660000  |
| 41   | 820.95020000  | 8.45910000   |
| 42   | 865.10940000  | 31.40770000  |
| 43   | 870.05760000  | 92.26500000  |
| 44   | 907.89560000  | 72.07440000  |
| 45   | 949.98200000  | 31.86040000  |
| 46   | 958.88900000  | 39.93570000  |
| 47   | 973.12380000  | 30.59700000  |
| 48   | 985.63640000  | 66.55810000  |
| 49   | 1008.48320000 | 26.28840000  |
| 50   | 1015.66880000 | 8.29610000   |
| 51   | 1050.95430000 | 11.16960000  |
| 52   | 1051.31680000 | 98.21760000  |
| 53   | 1052.70020000 | 157.73390000 |
| 54   | 1082.05710000 | 0.54400000   |
| 55   | 1098.17230000 | 21.42050000  |
| 56   | 1119.87690000 | 18.35450000  |
| 57   | 1128.47460000 | 22.65170000  |
| 58   | 1141.15640000 | 9.67450000   |
| 59   | 1152.72310000 | 3.00600000   |
| 60   | 1169.70950000 | 283.67900000 |

|     |               |               |
|-----|---------------|---------------|
| 61  | 1178.02820000 | 2.72040000    |
| 62  | 1178.47280000 | 0.94100000    |
| 63  | 1195.50750000 | 7.89220000    |
| 64  | 1227.49050000 | 22.78650000   |
| 65  | 1248.93660000 | 5.43640000    |
| 66  | 1264.44370000 | 12.81660000   |
| 67  | 1289.47690000 | 33.82020000   |
| 68  | 1294.74200000 | 17.42410000   |
| 69  | 1306.20540000 | 21.19480000   |
| 70  | 1342.41710000 | 111.89140000  |
| 71  | 1368.57110000 | 18.21010000   |
| 72  | 1384.68830000 | 204.66680000  |
| 73  | 1425.66630000 | 57.07240000   |
| 74  | 1442.40460000 | 16.89450000   |
| 75  | 1447.96980000 | 83.80220000   |
| 76  | 1454.68080000 | 47.02620000   |
| 77  | 1458.28190000 | 181.13370000  |
| 78  | 1462.28590000 | 27.23340000   |
| 79  | 1472.77660000 | 2.56030000    |
| 80  | 1475.74640000 | 27.19020000   |
| 81  | 1476.83540000 | 0.02270000    |
| 82  | 1482.07220000 | 38.19310000   |
| 83  | 1486.45740000 | 3.18830000    |
| 84  | 1488.79570000 | 5.97940000    |
| 85  | 1489.98860000 | 3.13770000    |
| 86  | 1492.15140000 | 8.60110000    |
| 87  | 1502.28410000 | 9.08060000    |
| 88  | 1503.26690000 | 10.80900000   |
| 89  | 1507.66800000 | 18.15720000   |
| 90  | 1509.33550000 | 13.10030000   |
| 91  | 1518.08480000 | 42.84130000   |
| 92  | 1523.80260000 | 13.99020000   |
| 93  | 1533.40120000 | 80.28200000   |
| 94  | 1559.53710000 | 25.62480000   |
| 95  | 1653.52590000 | 690.53790000  |
| 96  | 1685.30130000 | 249.04450000  |
| 97  | 2976.32690000 | 95.72650000   |
| 98  | 2979.47700000 | 102.58290000  |
| 99  | 3015.69760000 | 91.92450000   |
| 100 | 3030.13210000 | 79.24350000   |
| 101 | 3057.23900000 | 1725.38810000 |
| 102 | 3062.81880000 | 6.84800000    |
| 103 | 3078.23500000 | 66.74600000   |
| 104 | 3085.83060000 | 70.92910000   |
| 105 | 3086.46710000 | 3.96270000    |
| 106 | 3090.53670000 | 8.08360000    |
| 107 | 3094.90150000 | 20.52150000   |
| 108 | 3106.80250000 | 4.80810000    |
| 109 | 3136.77330000 | 4.95550000    |
| 110 | 3170.19420000 | 1.46250000    |
| 111 | 3175.57460000 | 3.49510000    |
| 112 | 3177.84560000 | 9.84230000    |
| 113 | 3191.82210000 | 8.15760000    |
| 114 | 3205.74890000 | 4.54180000    |
| 115 | 3212.66950000 | 6.09930000    |
| 116 | 3297.62700000 | 25.28240000   |
| 117 | 3302.16830000 | 22.58480000   |
| 118 | 3509.09010000 | 1001.39810000 |
| 119 | 3574.40180000 | 1066.20070000 |
| 120 | 3626.78870000 | 239.37780000  |

## S31. METHYL-HERCYNINE (CONFORMER A)

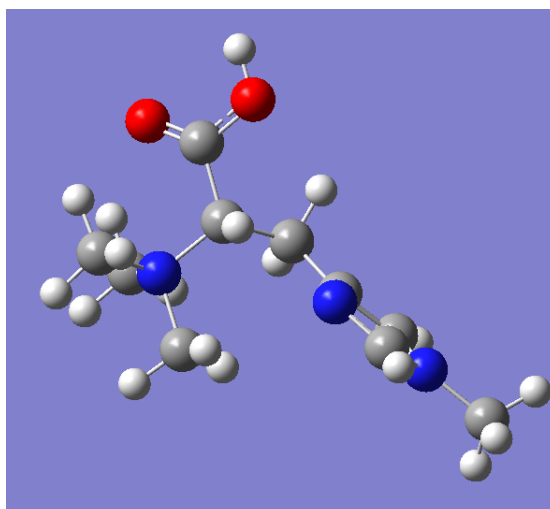

```

Route : # opt freq b3lyp/cc-pvtz geom=connectivity empiricaldispersion=gd3bj i
       : nt=ultrafine pop=regular
SMILES : Cn1cc(nc1)CC(C(=O)O)[N](C)(C)C
Formula : C10H18N3O2+
Charge : 1
Multiplicity : 1
Energy : -706.70265194 a.u.
Gibbs Energy : -706.45739500 a.u.
Number of imaginary frequencies : 1

```

## S31.1. Cartesian Co-ordinates (XYZ format)

33

```

C 2.52880812 0.29206800 -0.99441600
C 1.33861804 0.37779200 -0.32054400
C 2.84799409 0.01380100 1.16057301
N 3.48787999 0.06238500 -0.03338400
H 2.78060293 0.38974699 -2.03525400
N 1.55021501 0.19799399 1.02386606
C -0.02953400 0.69675702 -0.85093099
H -0.19207101 0.25112000 -1.83158600
H -0.10943100 1.77328897 -1.00044894
C -1.14807105 0.31248301 0.13513701
H -0.71116602 0.37193099 1.13233101
N -1.64331198 -1.13365197 0.00752300
C -2.29809403 1.31282902 0.07555100
O -3.41955900 1.10121500 -0.30523500
O -1.86778402 2.49536204 0.52251297
C -0.47937000 -2.07477999 0.17167000
H 0.20668800 -1.94512999 -0.65665698
H 0.03094200 -1.84579206 1.10033703
H -0.87260097 -3.08650589 0.17737199
C -2.30323505 -1.42777002 -1.31381404
H -3.15857410 -0.77677298 -1.43422306
H -1.58478296 -1.27315903 -2.11056399

```

```

H -2.60942698 -2.46943998 -1.30218101
C -2.61689496 -1.42392194 1.12116599
H -2.88068199 -2.47569108 1.07266700
H -2.12883806 -1.20891404 2.06725001
H -3.49923706 -0.81061298 0.99263197
H -2.59739304 3.13293290 0.46543899
H 3.36745095 -0.15910400 2.08791900
C 4.91820908 -0.08236900 -0.26099500
H 5.32814693 0.83183402 -0.68606597
H 5.40607119 -0.27912501 0.68944502
H 5.11180115 -0.91327399 -0.93666703

```

### S31.2. Frequencies

| Mode | IR frequency  | IR intensity |
|------|---------------|--------------|
| 1    | -6.70610000   | 0.69470000   |
| 2    | 38.51010000   | 1.92790000   |
| 3    | 64.26780000   | 2.49820000   |
| 4    | 81.29470000   | 1.52900000   |
| 5    | 93.13830000   | 2.61430000   |
| 6    | 125.15760000  | 3.78670000   |
| 7    | 164.68890000  | 8.15800000   |
| 8    | 193.61460000  | 2.30720000   |
| 9    | 215.92370000  | 0.23830000   |
| 10   | 251.51310000  | 1.69390000   |
| 11   | 268.57920000  | 2.02450000   |
| 12   | 275.01100000  | 0.96540000   |
| 13   | 290.90790000  | 3.91130000   |
| 14   | 300.39890000  | 0.76630000   |
| 15   | 316.07820000  | 0.54170000   |
| 16   | 339.79380000  | 1.13870000   |
| 17   | 364.55220000  | 10.73360000  |
| 18   | 384.88160000  | 2.56780000   |
| 19   | 429.29130000  | 1.50450000   |
| 20   | 438.83280000  | 0.45990000   |
| 21   | 495.70560000  | 2.48270000   |
| 22   | 549.42750000  | 9.37290000   |
| 23   | 603.89880000  | 77.75980000  |
| 24   | 632.19020000  | 10.22690000  |
| 25   | 642.63950000  | 28.35050000  |
| 26   | 669.74360000  | 39.39680000  |
| 27   | 682.22730000  | 7.24700000   |
| 28   | 730.33260000  | 21.01440000  |
| 29   | 751.71340000  | 8.74860000   |
| 30   | 773.83290000  | 6.93640000   |
| 31   | 795.65860000  | 19.64850000  |
| 32   | 845.35070000  | 24.07810000  |
| 33   | 865.16950000  | 17.18940000  |
| 34   | 910.41380000  | 23.77200000  |
| 35   | 949.01620000  | 25.95050000  |
| 36   | 969.04710000  | 14.21600000  |
| 37   | 1001.69870000 | 17.86370000  |
| 38   | 1011.38730000 | 37.69560000  |
| 39   | 1063.16110000 | 4.12970000   |
| 40   | 1072.68520000 | 2.90400000   |
| 41   | 1080.28920000 | 0.05840000   |
| 42   | 1085.15360000 | 9.19400000   |
| 43   | 1137.92930000 | 35.96730000  |
| 44   | 1151.36160000 | 1.90150000   |
| 45   | 1154.24370000 | 25.45480000  |
| 46   | 1171.50700000 | 155.67610000 |
| 47   | 1179.48670000 | 42.66920000  |

|    |               |              |
|----|---------------|--------------|
| 48 | 1221.25250000 | 1.52690000   |
| 49 | 1252.30700000 | 6.72540000   |
| 50 | 1257.94780000 | 34.73640000  |
| 51 | 1274.85350000 | 2.07160000   |
| 52 | 1289.30700000 | 6.75170000   |
| 53 | 1303.96840000 | 4.07830000   |
| 54 | 1321.16680000 | 14.97980000  |
| 55 | 1353.69800000 | 14.74950000  |
| 56 | 1362.85010000 | 62.09010000  |
| 57 | 1398.81330000 | 25.13030000  |
| 58 | 1417.81900000 | 1.09570000   |
| 59 | 1433.59630000 | 13.27130000  |
| 60 | 1445.78700000 | 14.16520000  |
| 61 | 1454.99840000 | 0.80980000   |
| 62 | 1459.88500000 | 24.02490000  |
| 63 | 1476.75630000 | 7.93990000   |
| 64 | 1480.56500000 | 2.90680000   |
| 65 | 1489.07830000 | 10.50150000  |
| 66 | 1491.52180000 | 34.19070000  |
| 67 | 1498.32230000 | 7.13790000   |
| 68 | 1502.26110000 | 0.81690000   |
| 69 | 1513.16980000 | 14.56130000  |
| 70 | 1517.88270000 | 14.06840000  |
| 71 | 1519.03460000 | 22.42160000  |
| 72 | 1534.05170000 | 81.02380000  |
| 73 | 1538.04550000 | 41.51980000  |
| 74 | 1588.71210000 | 3.62010000   |
| 75 | 1815.43500000 | 293.06620000 |
| 76 | 3055.89680000 | 25.75990000  |
| 77 | 3062.23500000 | 21.99340000  |
| 78 | 3071.23200000 | 17.59970000  |
| 79 | 3081.48150000 | 1.08420000   |
| 80 | 3085.03000000 | 2.87730000   |
| 81 | 3089.90810000 | 2.58970000   |
| 82 | 3095.11810000 | 10.53150000  |
| 83 | 3120.96700000 | 6.12470000   |
| 84 | 3146.76310000 | 3.16900000   |
| 85 | 3164.27590000 | 1.23590000   |
| 86 | 3170.57950000 | 1.24920000   |
| 87 | 3177.01980000 | 2.51840000   |
| 88 | 3188.06610000 | 2.06940000   |
| 89 | 3198.83870000 | 0.69990000   |
| 90 | 3207.53710000 | 6.15520000   |
| 91 | 3247.27010000 | 1.49050000   |
| 92 | 3260.17140000 | 1.22930000   |
| 93 | 3723.33290000 | 158.28690000 |

## S32. METHYL-HERCYNINE (CONFORMER B)

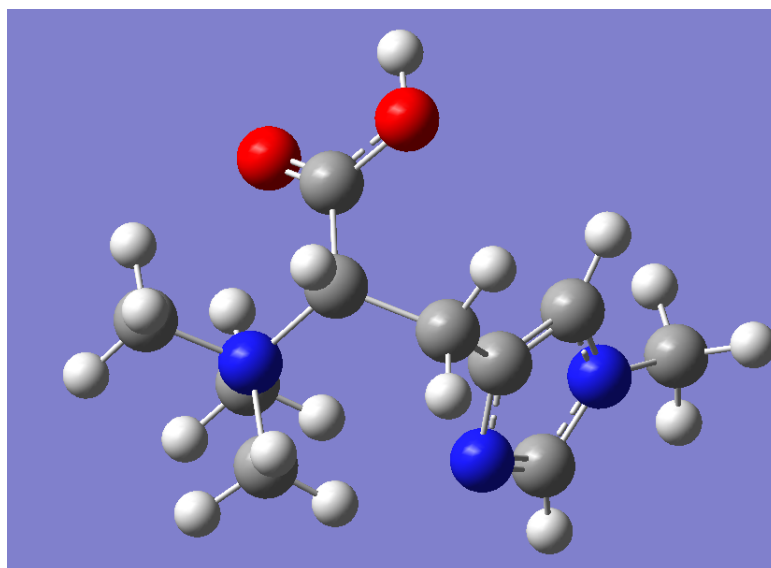

```

Route : # opt freq b3lyp/cc-pvtz geom=connectivity empiricaldispersion=gd3bj i
       : nt=ultrafine pop=regular
SMILES : Cn1cc(nc1)CC(C(=O)O)[N](C)(C)C
Formula : C10H18N3O2+
Charge : 1
Multiplicity : 1
Energy : -706.70396666 a.u.
Gibbs Energy : -706.45990700 a.u.
Number of imaginary frequencies : 0

```

## S32.1. Cartesian Co-ordinates (XYZ format)

33

```

C -2.17720294 0.67714798 -0.44005400
C -1.13813698 -0.16418800 -0.74268901
C -2.61271691 -1.35535502 0.26736501
N -3.11354399 -0.09501400 0.20570999
H -2.34036207 1.72041905 -0.64225900
N -1.42424405 -1.43489802 -0.29336900
C 0.11372000 0.12237800 -1.49940801
H -0.01832300 1.02397001 -2.09257698
H 0.29516301 -0.68010002 -2.21055794
C 1.40590894 0.37621799 -0.69332999
H 2.18684912 0.57292098 -1.42965698
N 1.95724297 -0.81452602 0.10750300
C 1.32195401 1.64835799 0.15424500
O 1.66805601 1.77250195 1.29769599
O 0.84526801 2.65126705 -0.59174699
C 1.88048196 -2.05790091 -0.73883301
H 0.83964700 -2.34610510 -0.84433901
H 2.33654308 -1.86210406 -1.70518601
H 2.43325400 -2.83770990 -0.22463600
C 1.22774994 -1.10620797 1.40179300

```

H 1.31182003 -0.24940699 2.05431700  
 H 0.19711301 -1.33929396 1.16564906  
 H 1.71287704 -1.97150099 1.84394002  
 C 3.40688992 -0.55091399 0.42263600  
 H 3.79515910 -1.40877998 0.96222299  
 H 3.95125389 -0.42584899 -0.50910997  
 H 3.47878003 0.33864099 1.03574002  
 H 0.85398501 3.45864892 -0.05308800  
 H -3.15292311 -2.16810989 0.72306502  
 C -4.41060495 0.35005099 0.69476402  
 H -4.91015100 -0.48688799 1.17433798  
 H -4.28609610 1.15055203 1.42132103  
 H -5.02583694 0.70288801 -0.13074000

### S32.2. Frequencies

| Mode | IR frequency  | IR intensity |
|------|---------------|--------------|
| 1    | 27.28520000   | 3.90320000   |
| 2    | 36.61280000   | 3.66260000   |
| 3    | 53.58670000   | 1.10470000   |
| 4    | 73.33850000   | 0.21220000   |
| 5    | 102.47870000  | 0.58610000   |
| 6    | 133.42840000  | 3.78830000   |
| 7    | 172.47200000  | 5.91370000   |
| 8    | 206.25800000  | 4.62930000   |
| 9    | 226.59610000  | 0.28530000   |
| 10   | 235.52870000  | 3.36610000   |
| 11   | 270.36520000  | 0.93550000   |
| 12   | 283.20010000  | 1.27800000   |
| 13   | 313.96480000  | 4.84080000   |
| 14   | 340.71460000  | 2.10630000   |
| 15   | 343.09380000  | 3.32730000   |
| 16   | 365.05370000  | 4.27540000   |
| 17   | 378.18350000  | 1.95420000   |
| 18   | 417.38500000  | 1.21030000   |
| 19   | 435.83650000  | 1.65100000   |
| 20   | 445.16130000  | 1.67180000   |
| 21   | 521.25940000  | 12.34920000  |
| 22   | 545.03370000  | 8.76740000   |
| 23   | 600.51300000  | 1.70950000   |
| 24   | 606.62210000  | 36.07080000  |
| 25   | 646.88440000  | 21.60730000  |
| 26   | 661.73160000  | 62.74950000  |
| 27   | 689.30310000  | 41.10300000  |
| 28   | 717.60110000  | 7.57060000   |
| 29   | 743.25540000  | 5.21480000   |
| 30   | 783.69710000  | 14.20240000  |
| 31   | 807.05420000  | 21.06880000  |
| 32   | 852.47320000  | 20.93320000  |
| 33   | 865.64490000  | 2.91050000   |
| 34   | 888.39850000  | 44.63550000  |
| 35   | 951.55390000  | 19.20000000  |
| 36   | 961.09270000  | 10.58030000  |
| 37   | 985.02290000  | 15.24010000  |
| 38   | 1015.27580000 | 16.78250000  |
| 39   | 1042.38340000 | 36.95200000  |
| 40   | 1073.31700000 | 1.42210000   |
| 41   | 1084.39690000 | 6.17090000   |
| 42   | 1086.54070000 | 0.53550000   |
| 43   | 1145.79600000 | 28.63130000  |
| 44   | 1149.92130000 | 48.43660000  |
| 45   | 1151.64720000 | 0.70020000   |



|    |               |              |
|----|---------------|--------------|
| 46 | 1172.76200000 | 143.26100000 |
| 47 | 1184.89410000 | 40.02980000  |
| 48 | 1225.43290000 | 5.57390000   |
| 49 | 1249.80860000 | 2.05260000   |
| 50 | 1258.99930000 | 1.96010000   |
| 51 | 1270.51690000 | 11.42740000  |
| 52 | 1296.74530000 | 0.40170000   |
| 53 | 1302.96480000 | 5.75940000   |
| 54 | 1341.31160000 | 9.07720000   |
| 55 | 1345.85790000 | 18.47160000  |
| 56 | 1377.26120000 | 0.69000000   |
| 57 | 1391.52390000 | 11.06880000  |
| 58 | 1413.21130000 | 19.13390000  |
| 59 | 1427.65000000 | 0.59630000   |
| 60 | 1448.79300000 | 8.16840000   |
| 61 | 1451.94820000 | 4.82110000   |
| 62 | 1461.72890000 | 21.71020000  |
| 63 | 1481.98140000 | 14.00780000  |
| 64 | 1483.57490000 | 9.31570000   |
| 65 | 1489.54280000 | 11.04060000  |
| 66 | 1493.86260000 | 15.48320000  |
| 67 | 1501.77570000 | 12.77450000  |
| 68 | 1507.38210000 | 3.41860000   |
| 69 | 1516.75720000 | 18.11030000  |
| 70 | 1517.60310000 | 15.69080000  |
| 71 | 1526.67520000 | 2.53580000   |
| 72 | 1537.11590000 | 65.16730000  |
| 73 | 1545.44420000 | 34.04360000  |
| 74 | 1597.46840000 | 4.10680000   |
| 75 | 1821.25350000 | 240.78310000 |
| 76 | 3056.40880000 | 23.74070000  |
| 77 | 3059.49210000 | 1.76270000   |
| 78 | 3068.27510000 | 5.01840000   |
| 79 | 3080.52060000 | 2.30770000   |
| 80 | 3088.47530000 | 22.24040000  |
| 81 | 3090.59510000 | 22.05500000  |
| 82 | 3121.93000000 | 5.84270000   |
| 83 | 3125.66760000 | 1.09180000   |
| 84 | 3147.13040000 | 2.96820000   |
| 85 | 3159.58280000 | 0.47330000   |
| 86 | 3164.96840000 | 6.78840000   |
| 87 | 3167.93450000 | 1.19960000   |
| 88 | 3174.02010000 | 23.66950000  |
| 89 | 3194.52270000 | 1.76130000   |
| 90 | 3219.24010000 | 16.08860000  |
| 91 | 3245.92610000 | 1.38610000   |
| 92 | 3263.34710000 | 1.42050000   |
| 93 | 3722.21740000 | 140.59110000 |

## S33. METHYL-HERCYNINE (CONFORMER C)

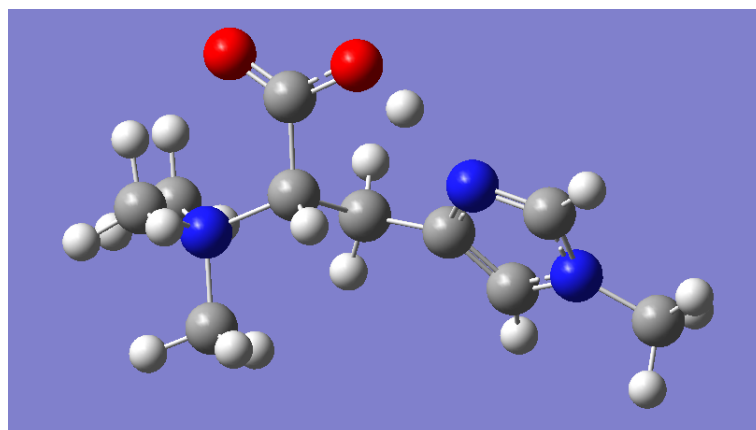

```

Route                : # opt freq b3lyp/cc-pvtz geom=connectivity empiricaldispersion=gd3bj i
                    : nt=ultrafine pop=regular
SMILES               : Cn1cc(nc1)CC(C(=O)O)[N](C)(C)C
Formula              : C10H18N3O2+
Charge               : 1
Multiplicity         : 1
Energy               : -706.70716969
Gibbs Energy        : -706.46270900
Number of imaginary frequencies : 0

```

a.u.

a.u.

## S33.1. Cartesian Co-ordinates (XYZ format)

33

```

C  2.50958109 -0.96101600 -0.57438600
C  1.38295698 -0.20344600 -0.40816200
C  2.98961401  0.84666502  0.58287901
N  3.52469110 -0.27707601  0.05866500
H  2.68318200 -1.89435804 -1.07858300
N  1.69893801  0.91901797  0.32120401
C -0.01319100 -0.42410401 -0.90431899
H -0.13418201 -1.48065901 -1.12683594
H -0.17178400  0.10741300 -1.84484696
C -1.05666804  0.05984400  0.13301501
H -0.62358201 -0.00950600  1.12911403
N -2.30160093 -0.83520800  0.20814800
C -1.41995800  1.54352498 -0.13542201
O -2.50761509  1.87493205 -0.54087502
O -0.44743600  2.38633990  0.09459700
C -1.89657605 -2.19802809  0.69327700
H -1.23853004 -2.67190909 -0.02420700
H -1.39496303 -2.09696198  1.65107095
H -2.79457402 -2.79687691  0.80736399
C -2.99663305 -0.97321600 -1.12110102
H -3.29734993  0.01277000 -1.45120597
H -2.31474209 -1.42900598 -1.83085299
H -3.85990691 -1.61662996 -0.97952902
C -3.27488399 -0.28128299  1.22309995
H -4.07580996 -1.00389099  1.34407401

```

H -2.74959207 -0.15026499 2.16510797  
 H -3.65793109 0.66314399 0.86284399  
 H 0.43976599 1.93690896 0.31845999  
 H 3.56395292 1.56950104 1.13597298  
 C 4.91950512 -0.69239098 0.14072201  
 H 5.34668493 -0.76819801 -0.85695398  
 H 5.47342491 0.04975700 0.70805699  
 H 4.99600697 -1.65409100 0.64369798

### S33.2. Frequencies

| Mode | IR frequency  | IR intensity |
|------|---------------|--------------|
| 1    | 33.69270000   | 1.43630000   |
| 2    | 66.97690000   | 0.52300000   |
| 3    | 79.94640000   | 0.28820000   |
| 4    | 84.04670000   | 0.48950000   |
| 5    | 108.11220000  | 2.21860000   |
| 6    | 144.74270000  | 2.86130000   |
| 7    | 178.76750000  | 5.09910000   |
| 8    | 201.82480000  | 1.35150000   |
| 9    | 231.79870000  | 5.60240000   |
| 10   | 253.08850000  | 4.53110000   |
| 11   | 260.31730000  | 3.56590000   |
| 12   | 264.58900000  | 7.22060000   |
| 13   | 275.97240000  | 0.68620000   |
| 14   | 308.71320000  | 6.87360000   |
| 15   | 330.89480000  | 9.24890000   |
| 16   | 337.64450000  | 2.45300000   |
| 17   | 365.67010000  | 6.00710000   |
| 18   | 398.43940000  | 0.25590000   |
| 19   | 433.51670000  | 1.81170000   |
| 20   | 441.37780000  | 1.02360000   |
| 21   | 489.78810000  | 0.95990000   |
| 22   | 550.50040000  | 1.96720000   |
| 23   | 632.12000000  | 10.73360000  |
| 24   | 644.97000000  | 14.71280000  |
| 25   | 674.67990000  | 11.53210000  |
| 26   | 692.23930000  | 3.86870000   |
| 27   | 749.12640000  | 2.55230000   |
| 28   | 772.23930000  | 6.79850000   |
| 29   | 784.68930000  | 14.34330000  |
| 30   | 814.22740000  | 25.39570000  |
| 31   | 846.15120000  | 3.65350000   |
| 32   | 853.05430000  | 30.78200000  |
| 33   | 907.22810000  | 46.82220000  |
| 34   | 944.89500000  | 18.93530000  |
| 35   | 971.37590000  | 17.92600000  |
| 36   | 1002.41930000 | 5.17270000   |
| 37   | 1026.35230000 | 13.90210000  |
| 38   | 1036.12060000 | 53.47040000  |
| 39   | 1052.96760000 | 64.78800000  |
| 40   | 1073.47120000 | 9.89790000   |
| 41   | 1075.78080000 | 1.99830000   |
| 42   | 1090.84060000 | 10.78220000  |
| 43   | 1138.78100000 | 3.49280000   |
| 44   | 1149.83960000 | 3.25480000   |
| 45   | 1153.04230000 | 0.05120000   |
| 46   | 1182.46010000 | 28.62450000  |
| 47   | 1216.23180000 | 13.14980000  |
| 48   | 1241.45900000 | 18.82190000  |
| 49   | 1247.71540000 | 34.40980000  |
| 50   | 1262.48590000 | 36.72560000  |

|    |               |               |
|----|---------------|---------------|
| 51 | 1278.96980000 | 31.07870000   |
| 52 | 1295.21420000 | 6.48730000    |
| 53 | 1322.60510000 | 19.25670000   |
| 54 | 1340.45410000 | 18.60440000   |
| 55 | 1348.70450000 | 7.48610000    |
| 56 | 1387.92110000 | 6.16240000    |
| 57 | 1415.60700000 | 6.52380000    |
| 58 | 1424.72520000 | 2.09640000    |
| 59 | 1439.11410000 | 9.07200000    |
| 60 | 1447.40020000 | 18.18420000   |
| 61 | 1462.86120000 | 28.28640000   |
| 62 | 1475.72630000 | 0.95010000    |
| 63 | 1484.05620000 | 30.54420000   |
| 64 | 1489.20590000 | 11.86620000   |
| 65 | 1491.98420000 | 2.23780000    |
| 66 | 1496.85650000 | 2.43790000    |
| 67 | 1507.99300000 | 8.45220000    |
| 68 | 1508.90350000 | 7.54060000    |
| 69 | 1517.52500000 | 17.01180000   |
| 70 | 1522.22550000 | 79.87520000   |
| 71 | 1525.58690000 | 137.63270000  |
| 72 | 1539.58050000 | 51.37400000   |
| 73 | 1547.74510000 | 125.85890000  |
| 74 | 1606.16540000 | 21.46070000   |
| 75 | 1811.29420000 | 413.85850000  |
| 76 | 2739.33070000 | 2033.72140000 |
| 77 | 3042.83490000 | 7.52750000    |
| 78 | 3060.09140000 | 16.20890000   |
| 79 | 3079.07420000 | 2.90350000    |
| 80 | 3082.78320000 | 1.73970000    |
| 81 | 3086.53900000 | 7.20860000    |
| 82 | 3090.79710000 | 3.27170000    |
| 83 | 3114.84040000 | 8.08080000    |
| 84 | 3128.00410000 | 4.16840000    |
| 85 | 3151.67600000 | 2.14420000    |
| 86 | 3160.13540000 | 0.74870000    |
| 87 | 3166.30070000 | 1.84860000    |
| 88 | 3169.53460000 | 4.49650000    |
| 89 | 3187.09460000 | 3.54780000    |
| 90 | 3198.94330000 | 4.80550000    |
| 91 | 3209.95570000 | 9.67650000    |
| 92 | 3258.39120000 | 4.80860000    |
| 93 | 3266.71280000 | 2.37140000    |

S34. ERGOTHIONINE (1N $\epsilon$ +NA)<sub>SH</sub> (THIOL; ISOMER A)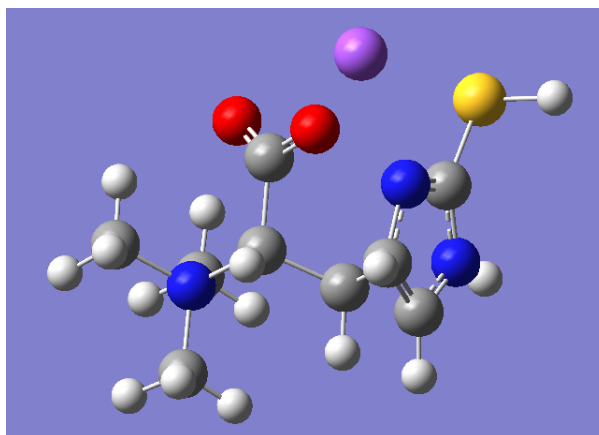

```

Route : # opt freq b3lyp/cc-pvtz geom=connectivity empiricaldispersion=gd3bj i
       : nt=ultrafine pop=regular
SMILES : C[N](C)(C)C(Cc1c[nH]c(n1)S)C(=O)[O].[Na]
Formula : C9H15N3NaO2S+
Charge : 1
Multiplicity : 1
Energy : -1227.40766370 a.u.
Gibbs Energy : -1227.20483500 a.u.
Number of imaginary frequencies : 0

```

## S34.1. Cartesian Co-ordinates (XYZ format)

31

```

C -1.10372996 -2.22076893 -0.59231400
C -0.52875400 -0.99553901 -0.81848699
C -2.48319101 -0.61935198 0.03911400
N -2.33582306 -1.96729004 -0.04226600
H -3.02069306 -2.64755797 0.24378800
H -0.75993001 -3.22082305 -0.78712499
N -1.40787601 -0.00903200 -0.41844901
S -3.87553000 0.18800600 0.75950402
C 0.79099298 -0.70976901 -1.47017395
H 0.60309100 -0.16105600 -2.39323092
H 1.24830997 -1.65214205 -1.76634502
C 1.79945600 0.19151200 -0.72750199
H 2.58087111 0.45220000 -1.43741500
N 2.57154202 -0.48575199 0.42300299
C 1.07936704 1.50569797 -0.32951301
O 0.82183200 1.73082995 0.87705302
O 0.70966101 2.16823196 -1.31578696
C 3.37299609 -1.63141596 -0.11305000
H 2.70765901 -2.41140389 -0.46375501
H 3.99888301 -1.27876198 -0.92766500
H 3.99486399 -2.02102804 0.68749899
C 1.68186402 -0.99194402 1.52423406
H 1.08984101 -0.15753201 1.87898600
H 1.04581702 -1.77451801 1.12866998
H 2.31883407 -1.38981402 2.30935693

```

|    |             |            |             |
|----|-------------|------------|-------------|
| C  | 3.53367305  | 0.51996499 | 0.99968898  |
| H  | 4.13637781  | 0.02079800 | 1.75266802  |
| H  | 4.16952896  | 0.88774103 | 0.19931699  |
| H  | 2.95935512  | 1.32816398 | 1.43485701  |
| H  | -4.63540888 | 0.22797000 | -0.35471100 |
| Na | -1.20945406 | 2.40784097 | -0.07987700 |

### S34.2. Frequencies

| Mode | IR frequency  | IR intensity |
|------|---------------|--------------|
| 1    | 29.96520000   | 2.45270000   |
| 2    | 59.12040000   | 0.34330000   |
| 3    | 71.51740000   | 0.82100000   |
| 4    | 94.20420000   | 2.28910000   |
| 5    | 110.22140000  | 8.76060000   |
| 6    | 153.03130000  | 20.21450000  |
| 7    | 159.72690000  | 24.86030000  |
| 8    | 178.84470000  | 7.39960000   |
| 9    | 206.12300000  | 8.08080000   |
| 10   | 218.79960000  | 2.57780000   |
| 11   | 220.62020000  | 7.35790000   |
| 12   | 248.57930000  | 3.79600000   |
| 13   | 262.24880000  | 8.04810000   |
| 14   | 274.70350000  | 3.54200000   |
| 15   | 283.84230000  | 22.93760000  |
| 16   | 299.20760000  | 6.75470000   |
| 17   | 323.85620000  | 6.72280000   |
| 18   | 330.54870000  | 7.34910000   |
| 19   | 337.66690000  | 4.88140000   |
| 20   | 372.09950000  | 23.96510000  |
| 21   | 399.56280000  | 4.64480000   |
| 22   | 428.66620000  | 2.93640000   |
| 23   | 433.32950000  | 1.10870000   |
| 24   | 471.65530000  | 2.16970000   |
| 25   | 528.61370000  | 2.53350000   |
| 26   | 576.68590000  | 4.23620000   |
| 27   | 606.84130000  | 74.69520000  |
| 28   | 643.92830000  | 6.90860000   |
| 29   | 676.71230000  | 2.83840000   |
| 30   | 708.99340000  | 10.53760000  |
| 31   | 730.55450000  | 11.38910000  |
| 32   | 741.27790000  | 2.58210000   |
| 33   | 794.82660000  | 18.96340000  |
| 34   | 834.79100000  | 36.20340000  |
| 35   | 865.32830000  | 19.42330000  |
| 36   | 903.89480000  | 27.77150000  |
| 37   | 949.24990000  | 9.97600000   |
| 38   | 959.05100000  | 24.93830000  |
| 39   | 969.92340000  | 8.49010000   |
| 40   | 991.69650000  | 20.63640000  |
| 41   | 1002.58950000 | 2.00910000   |
| 42   | 1010.55900000 | 0.91370000   |
| 43   | 1049.57130000 | 3.74470000   |
| 44   | 1077.61390000 | 1.14180000   |
| 45   | 1117.93510000 | 33.43120000  |
| 46   | 1138.88100000 | 3.53370000   |
| 47   | 1148.20400000 | 3.17630000   |
| 48   | 1192.96240000 | 10.86280000  |
| 49   | 1229.73550000 | 11.49790000  |
| 50   | 1248.08520000 | 2.97870000   |
| 51   | 1262.14440000 | 13.63810000  |
| 52   | 1292.50650000 | 0.57340000   |

|    |               |              |
|----|---------------|--------------|
| 53 | 1297.50370000 | 4.39100000   |
| 54 | 1307.27030000 | 7.23810000   |
| 55 | 1347.24480000 | 5.75470000   |
| 56 | 1370.77670000 | 47.15660000  |
| 57 | 1400.11490000 | 14.28280000  |
| 58 | 1409.26130000 | 66.59850000  |
| 59 | 1434.33590000 | 2.87020000   |
| 60 | 1440.22280000 | 51.16770000  |
| 61 | 1446.97280000 | 14.13190000  |
| 62 | 1466.50660000 | 34.40350000  |
| 63 | 1478.15010000 | 9.93070000   |
| 64 | 1485.39250000 | 21.41570000  |
| 65 | 1489.69910000 | 20.34340000  |
| 66 | 1495.37930000 | 1.88630000   |
| 67 | 1505.95810000 | 4.79710000   |
| 68 | 1509.38550000 | 28.17860000  |
| 69 | 1523.23880000 | 20.81960000  |
| 70 | 1541.56180000 | 49.93270000  |
| 71 | 1591.27500000 | 22.65120000  |
| 72 | 1686.89680000 | 382.30100000 |
| 73 | 2635.08670000 | 1.20180000   |
| 74 | 3065.10480000 | 5.98810000   |
| 75 | 3073.90360000 | 4.45220000   |
| 76 | 3077.33370000 | 3.33540000   |
| 77 | 3082.63370000 | 21.67040000  |
| 78 | 3100.10750000 | 4.17930000   |
| 79 | 3102.40760000 | 11.49180000  |
| 80 | 3155.89550000 | 0.33390000   |
| 81 | 3161.34210000 | 5.34290000   |
| 82 | 3168.41200000 | 2.77260000   |
| 83 | 3178.74630000 | 5.78110000   |
| 84 | 3190.25310000 | 1.59140000   |
| 85 | 3194.62030000 | 9.98780000   |
| 86 | 3262.44040000 | 2.23640000   |
| 87 | 3638.03330000 | 122.04150000 |

S35. ERGOTHIONINE (1N $\epsilon$ +NA)<sub>SH</sub> (THIOL; ISOMER B)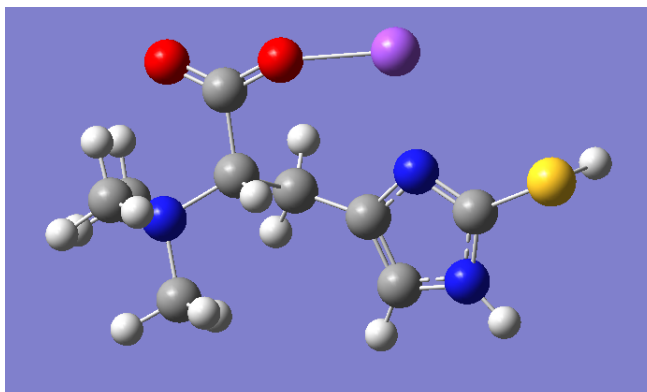

```

Route          : # opt freq b3lyp/cc-pvtz geom=connectivity empiricaldispersion=gd3bj i
                : nt=ultrafine pop=regular
SMILES         : C[N](C)(C)C(Cc1c[nH]c(n1)S)C(=O)[O].[Na]
Formula        : C9H15N3NaO2S+
Charge         : 1
Multiplicity   : 1
Energy         : -1227.39811138
Gibbs Energy   : -1227.19574500
Number of imaginary frequencies : 1

```

a.u.

a.u.

## S35.1. Cartesian Co-ordinates (XYZ format)

31

```

C -1.39690602  2.08431911 -0.52268302
C -0.83031499  0.83858597 -0.61085403
C -2.88945889  0.54832602  0.01059600
N -2.69472909  1.88454497 -0.12145400
H -1.00647700  3.06606388 -0.72104800
N -1.77810204 -0.10667800 -0.27277300
S -4.38640594 -0.18631600  0.58235902
C  0.56344098  0.48172101 -1.02219701
H  1.00577998  1.36924195 -1.46835995
H  0.52393103 -0.26088399 -1.81796396
C  1.45299101 -0.07220700  0.12314600
H  0.95137799  0.07232900  1.07667398
N  2.76981902  0.71883601  0.28841099
C  1.66990697 -1.61410105 -0.06946800
O  2.77247810 -2.02973795 -0.41463301
O  0.60419703 -2.24678206  0.13710400
C  2.46559310  2.13384891  0.66614801
H  1.92706800  2.62433290 -0.13608800
H  1.86563599  2.13654089  1.57143605
H  3.40224791  2.65510607  0.84142601
C  3.61399508  0.70478702 -0.95698202
H  3.79740095 -0.33175001 -1.21426404
H  3.08454108  1.21593404 -1.75364494
H  4.53861523  1.23207605 -0.74007499
C  3.56187010  0.10658800  1.41514003
H  4.43953800  0.72302699  1.58597004
H  2.93852997  0.09414500  2.30486298

```



H 3.83819389 -0.89940900 1.12632501  
H -5.00603485 -0.24380100 -0.61475098  
H -3.39072990 2.59288812 0.04516400  
Na -1.49043798 -2.42619705 0.05853000

### S35.2. Frequencies

| Mode | IR frequency  | IR intensity |
|------|---------------|--------------|
| 1    | -10.57160000  | 2.57800000   |
| 2    | 24.63160000   | 4.23050000   |
| 3    | 62.01280000   | 3.21710000   |
| 4    | 76.20790000   | 4.31590000   |
| 5    | 86.81140000   | 15.15930000  |
| 6    | 122.10270000  | 0.83070000   |
| 7    | 151.58630000  | 23.65490000  |
| 8    | 177.62280000  | 6.25760000   |
| 9    | 195.53950000  | 18.29120000  |
| 10   | 204.91820000  | 0.94030000   |
| 11   | 220.03180000  | 9.15870000   |
| 12   | 230.33330000  | 11.72370000  |
| 13   | 254.53780000  | 1.44400000   |
| 14   | 265.86640000  | 0.53070000   |
| 15   | 288.55750000  | 12.56240000  |
| 16   | 295.50890000  | 6.03150000   |
| 17   | 313.61480000  | 16.12130000  |
| 18   | 323.16480000  | 10.01850000  |
| 19   | 337.40480000  | 6.61630000   |
| 20   | 366.94630000  | 26.39020000  |
| 21   | 397.36200000  | 6.95050000   |
| 22   | 423.84700000  | 2.98640000   |
| 23   | 440.05620000  | 4.27460000   |
| 24   | 474.55420000  | 1.86800000   |
| 25   | 487.06250000  | 1.32410000   |
| 26   | 549.00620000  | 1.71220000   |
| 27   | 614.04810000  | 75.35520000  |
| 28   | 664.92070000  | 3.36880000   |
| 29   | 686.57110000  | 5.71680000   |
| 30   | 703.59770000  | 14.65280000  |
| 31   | 736.91580000  | 4.88370000   |
| 32   | 769.06370000  | 6.68120000   |
| 33   | 801.71660000  | 17.24620000  |
| 34   | 822.63060000  | 37.43570000  |
| 35   | 855.47720000  | 37.96430000  |
| 36   | 893.09860000  | 37.04150000  |
| 37   | 949.51300000  | 8.64590000   |
| 38   | 950.91440000  | 32.66280000  |
| 39   | 973.31060000  | 12.51550000  |
| 40   | 985.73730000  | 1.90340000   |
| 41   | 1007.28310000 | 3.11650000   |
| 42   | 1025.82060000 | 4.13590000   |
| 43   | 1038.43760000 | 2.14470000   |
| 44   | 1076.13560000 | 0.58690000   |
| 45   | 1119.74240000 | 35.10560000  |
| 46   | 1135.72640000 | 2.81140000   |
| 47   | 1148.62910000 | 3.57560000   |
| 48   | 1194.02690000 | 5.04910000   |
| 49   | 1228.76070000 | 1.73140000   |
| 50   | 1250.05050000 | 4.18530000   |
| 51   | 1252.61240000 | 24.62480000  |
| 52   | 1284.79420000 | 3.85410000   |
| 53   | 1289.00930000 | 1.24210000   |
| 54   | 1307.19320000 | 6.00080000   |

|    |               |              |
|----|---------------|--------------|
| 55 | 1356.82910000 | 7.81270000   |
| 56 | 1364.64220000 | 47.21620000  |
| 57 | 1367.96610000 | 136.84900000 |
| 58 | 1404.57840000 | 11.05160000  |
| 59 | 1428.28720000 | 13.79240000  |
| 60 | 1438.79960000 | 52.96910000  |
| 61 | 1443.23660000 | 22.37700000  |
| 62 | 1471.64830000 | 13.99700000  |
| 63 | 1477.80840000 | 29.84890000  |
| 64 | 1488.60470000 | 25.88680000  |
| 65 | 1491.74850000 | 1.82280000   |
| 66 | 1495.40470000 | 4.01750000   |
| 67 | 1506.48270000 | 8.03610000   |
| 68 | 1509.32410000 | 16.77110000  |
| 69 | 1523.68530000 | 25.43390000  |
| 70 | 1541.44880000 | 48.77370000  |
| 71 | 1593.44960000 | 35.13610000  |
| 72 | 1751.82170000 | 527.77370000 |
| 73 | 2635.63050000 | 1.11570000   |
| 74 | 3068.90960000 | 2.10580000   |
| 75 | 3072.62610000 | 7.61150000   |
| 76 | 3075.99260000 | 7.04900000   |
| 77 | 3081.31110000 | 18.72190000  |
| 78 | 3097.76950000 | 6.19990000   |
| 79 | 3108.22540000 | 11.39880000  |
| 80 | 3154.42310000 | 0.48230000   |
| 81 | 3159.59260000 | 6.95030000   |
| 82 | 3163.57500000 | 7.27040000   |
| 83 | 3176.91470000 | 6.98660000   |
| 84 | 3183.88720000 | 7.82530000   |
| 85 | 3192.84130000 | 15.02780000  |
| 86 | 3265.94750000 | 1.86500000   |
| 87 | 3636.76800000 | 123.23150000 |

S36. ERGOTHIONINE (1+NA)<sub>s</sub> (THIONE; ISOMER C)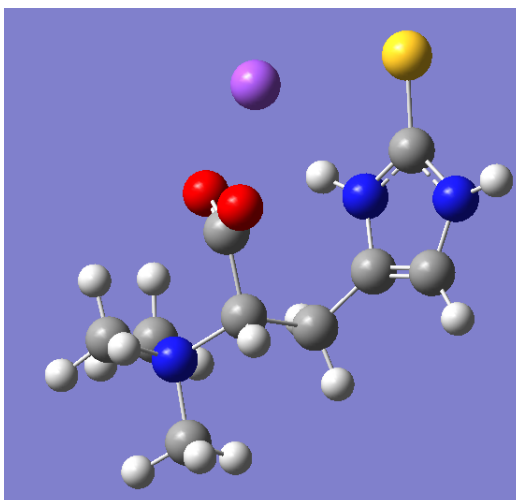

```

Route : # opt freq b3lyp/cc-pvtz geom=connectivity empiricaldispersion=gd3bj i
       : nt=ultrafine pop=regular
SMILES : C[N](C)(C)C(Cc1c[nH]c(=S)[nH]1)C(=O)[O].[Na]
Formula : C9H15N3NaO2S+
Charge : 1
Multiplicity : 1
Energy : -1227.41884860 a.u.
Gibbs Energy : -1227.21205500 a.u.
Number of imaginary frequencies : 0

```

## S36.1. Cartesian Co-ordinates (XYZ format)

31

```

C -1.32043898 -2.25046992 -0.71785200
C -0.53763402 -1.59963095 0.17370801
C -2.60331392 -0.65720201 0.26021501
N -2.58581209 -1.68605196 -0.63037503
H -3.37993789 -1.91400504 -1.20439303
H -1.09005797 -3.03668690 -1.41186500
N -1.36503994 -0.68629700 0.81254703
S -3.79205108 0.50870198 0.52988702
C 0.93596900 -1.53639495 0.38469601
H 1.39111805 -2.46651912 0.05176200
H 1.13400400 -1.43055201 1.45044303
C 1.52610397 -0.33240199 -0.39462700
H 1.59999895 -0.58858299 -1.44741297
N 2.97041512 0.00594200 0.01809400
C 0.59619403 0.91363299 -0.30150399
O -0.02133300 1.19105101 -1.34484398
O 0.46815401 1.46961904 0.81997597
C 3.88081288 -1.11546898 -0.38186499
H 3.60064697 -2.01617789 0.15267900
H 3.79909492 -1.27247596 -1.45336103
H 4.89999199 -0.84304601 -0.12358800
C 3.12593198 0.26517400 1.49326301
H 2.36281800 0.97485501 1.79310799

```

|    |             |             |             |
|----|-------------|-------------|-------------|
| H  | 3.01863790  | -0.66829199 | 2.03400612  |
| H  | 4.12400913  | 0.66139197  | 1.65539503  |
| C  | 3.38417411  | 1.24491000  | -0.72894198 |
| H  | 4.44292498  | 1.41298604  | -0.55678201 |
| H  | 3.19164801  | 1.09759402  | -1.78718805 |
| H  | 2.80653906  | 2.08371210  | -0.35664701 |
| H  | -1.04000497 | 0.01647100  | 1.45857894  |
| Na | -1.70451903 | 2.28275394  | -0.18453000 |

### S36.2. Frequencies

| Mode | IR frequency  | IR intensity |
|------|---------------|--------------|
| 1    | 36.65330000   | 0.32040000   |
| 2    | 58.57380000   | 2.84590000   |
| 3    | 72.80050000   | 5.71880000   |
| 4    | 84.87200000   | 5.92890000   |
| 5    | 104.03220000  | 8.33860000   |
| 6    | 112.75060000  | 9.08020000   |
| 7    | 162.82800000  | 6.38590000   |
| 8    | 185.80580000  | 15.01110000  |
| 9    | 197.00540000  | 23.70760000  |
| 10   | 218.43660000  | 21.80660000  |
| 11   | 231.39630000  | 7.32960000   |
| 12   | 245.05640000  | 20.44370000  |
| 13   | 255.07890000  | 4.00710000   |
| 14   | 268.80020000  | 1.51790000   |
| 15   | 282.16710000  | 0.92150000   |
| 16   | 296.48480000  | 1.83160000   |
| 17   | 330.09470000  | 4.34970000   |
| 18   | 336.04770000  | 2.23290000   |
| 19   | 356.59370000  | 10.42730000  |
| 20   | 389.11570000  | 2.99630000   |
| 21   | 430.43020000  | 0.80320000   |
| 22   | 443.70230000  | 2.30100000   |
| 23   | 479.35540000  | 2.58810000   |
| 24   | 517.80640000  | 17.05410000  |
| 25   | 550.65430000  | 0.12490000   |
| 26   | 594.02990000  | 26.42340000  |
| 27   | 647.19540000  | 55.04190000  |
| 28   | 670.01490000  | 93.07730000  |
| 29   | 703.41930000  | 15.73030000  |
| 30   | 706.07110000  | 32.66960000  |
| 31   | 724.52860000  | 1.47710000   |
| 32   | 759.59820000  | 10.44790000  |
| 33   | 792.48890000  | 38.53600000  |
| 34   | 828.94460000  | 42.96950000  |
| 35   | 850.96890000  | 24.68780000  |
| 36   | 918.10670000  | 18.37940000  |
| 37   | 959.55290000  | 20.53530000  |
| 38   | 967.90470000  | 11.81380000  |
| 39   | 992.18690000  | 5.90210000   |
| 40   | 1001.45190000 | 3.19140000   |
| 41   | 1035.83220000 | 1.79740000   |
| 42   | 1041.80730000 | 2.95670000   |
| 43   | 1082.02080000 | 0.16490000   |
| 44   | 1102.13600000 | 33.24840000  |
| 45   | 1138.10190000 | 3.67980000   |
| 46   | 1151.08120000 | 0.57360000   |
| 47   | 1188.01430000 | 17.42220000  |
| 48   | 1198.67860000 | 50.16270000  |
| 49   | 1242.33330000 | 4.08170000   |
| 50   | 1266.34310000 | 10.87700000  |

|    |               |              |
|----|---------------|--------------|
| 51 | 1268.81470000 | 9.17560000   |
| 52 | 1289.62090000 | 7.71800000   |
| 53 | 1296.16840000 | 9.53630000   |
| 54 | 1327.37800000 | 5.39530000   |
| 55 | 1340.90350000 | 7.80230000   |
| 56 | 1382.52130000 | 58.74870000  |
| 57 | 1404.76990000 | 5.56260000   |
| 58 | 1410.46230000 | 61.34020000  |
| 59 | 1437.42940000 | 5.58290000   |
| 60 | 1445.49460000 | 18.36570000  |
| 61 | 1452.19310000 | 3.31350000   |
| 62 | 1481.83580000 | 0.52630000   |
| 63 | 1486.75780000 | 18.22390000  |
| 64 | 1488.52450000 | 24.32930000  |
| 65 | 1496.22490000 | 1.13490000   |
| 66 | 1500.89670000 | 6.23790000   |
| 67 | 1512.24330000 | 15.97060000  |
| 68 | 1517.92660000 | 123.94400000 |
| 69 | 1520.26540000 | 243.62340000 |
| 70 | 1535.63350000 | 36.01190000  |
| 71 | 1669.69230000 | 82.20800000  |
| 72 | 1683.99800000 | 279.31100000 |
| 73 | 3067.09510000 | 6.20830000   |
| 74 | 3075.63920000 | 1.61180000   |
| 75 | 3076.83600000 | 8.16400000   |
| 76 | 3082.49740000 | 15.71610000  |
| 77 | 3108.73640000 | 0.90970000   |
| 78 | 3123.60060000 | 4.40150000   |
| 79 | 3160.29130000 | 0.54280000   |
| 80 | 3165.08090000 | 2.15190000   |
| 81 | 3168.66360000 | 3.16950000   |
| 82 | 3176.39680000 | 2.03240000   |
| 83 | 3178.92340000 | 1.75370000   |
| 84 | 3182.59940000 | 11.07820000  |
| 85 | 3283.10400000 | 6.66300000   |
| 86 | 3597.31040000 | 123.30780000 |
| 87 | 3650.53920000 | 129.71480000 |

S37. ERGOTHIONINE (1N $\epsilon$ +NA)<sub>SH</sub> (THIOL; ISOMER A) IN MEOH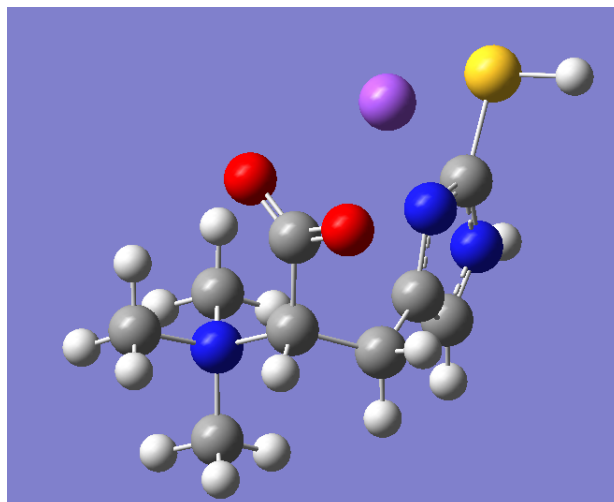

```

Route : # opt freq b3lyp/cc-pvtz scrf=(solvent=methanol) geom=connectivity emp
       : iricaldispersion=gd3bj int=ultrafine pop=regular
SMILES : C[N](C)(C)C(Cc1c[nH]c(n1)S)C(=O)[O].[Na]
Formula : C9H15N3NaO2S+
Charge : 1
Multiplicity : 1
Energy : -1227.50087343 a.u.
Gibbs Energy : -1227.30004600 a.u.
Number of imaginary frequencies : 0

```

## S37.1. Cartesian Co-ordinates (XYZ format)

31

```

C -1.00742197 -2.24096107 -0.64108598
C -0.48812699 -0.98850000 -0.85103798
C -2.41497803 -0.71090502 0.09270300
N -2.22216702 -2.04829311 -0.03820800
H -2.86905503 -2.76400805 0.25003299
H -0.62283999 -3.22059798 -0.85916603
N -1.38044298 -0.04345600 -0.38628000
S -3.83676100 -0.01147400 0.86716300
C 0.80653101 -0.64166200 -1.51409602
H 0.59864902 -0.05950700 -2.41107202
H 1.28576601 -1.55686903 -1.85212898
C 1.80375600 0.24021301 -0.73926002
H 2.61649489 0.47023001 -1.42404306
N 2.51820588 -0.46049500 0.43017700
C 1.12804997 1.59122300 -0.37840700
O 0.93210500 1.90144897 0.81839597
O 0.76104403 2.23610497 -1.38499296
C 3.23195791 -1.68009305 -0.07340100
H 2.50950789 -2.43074799 -0.36744201
H 3.85563302 -1.40254998 -0.91721398
H 3.84720492 -2.06651306 0.73240399
C 1.59766603 -0.87559497 1.54478395
H 1.06909704 0.00385000 1.88591099

```

|    |             |             |             |
|----|-------------|-------------|-------------|
| H  | 0.90708703  | -1.61927903 | 1.16919804  |
| H  | 2.20999098  | -1.30082095 | 2.33381510  |
| C  | 3.55752110  | 0.47758400  | 0.98136300  |
| H  | 4.10426283  | -0.04412300 | 1.75999296  |
| H  | 4.23154879  | 0.75531298  | 0.17697600  |
| H  | 3.05350995  | 1.34746099  | 1.38039696  |
| H  | -4.59479094 | 0.09139500  | -0.24280800 |
| Na | -1.28320098 | 2.45079803  | -0.09616700 |

### S37.2. Frequencies

| Mode | IR frequency  | IR intensity |
|------|---------------|--------------|
| 1    | 21.69450000   | 5.81500000   |
| 2    | 48.40790000   | 13.56980000  |
| 3    | 66.97540000   | 10.54780000  |
| 4    | 82.58210000   | 23.74040000  |
| 5    | 91.68740000   | 21.23570000  |
| 6    | 104.90570000  | 2.04070000   |
| 7    | 128.59800000  | 5.65890000   |
| 8    | 146.07960000  | 49.30920000  |
| 9    | 174.16090000  | 13.38970000  |
| 10   | 191.31160000  | 4.78840000   |
| 11   | 212.85410000  | 36.24180000  |
| 12   | 217.46820000  | 9.66900000   |
| 13   | 251.76470000  | 19.92330000  |
| 14   | 266.00760000  | 2.58540000   |
| 15   | 276.69600000  | 3.73870000   |
| 16   | 304.57630000  | 10.26070000  |
| 17   | 325.26500000  | 7.16540000   |
| 18   | 331.44300000  | 11.94170000  |
| 19   | 346.26170000  | 4.56610000   |
| 20   | 363.55780000  | 24.09550000  |
| 21   | 407.85090000  | 8.41470000   |
| 22   | 424.25470000  | 3.37300000   |
| 23   | 437.69800000  | 1.31340000   |
| 24   | 469.85430000  | 2.63270000   |
| 25   | 533.35040000  | 3.79510000   |
| 26   | 581.69220000  | 8.15000000   |
| 27   | 608.84460000  | 127.01110000 |
| 28   | 644.96480000  | 13.75640000  |
| 29   | 676.41920000  | 6.55060000   |
| 30   | 698.22370000  | 16.12950000  |
| 31   | 731.50180000  | 18.40830000  |
| 32   | 737.66200000  | 3.79950000   |
| 33   | 799.96510000  | 26.50990000  |
| 34   | 833.85010000  | 59.13080000  |
| 35   | 868.56520000  | 23.80010000  |
| 36   | 900.50220000  | 49.17000000  |
| 37   | 942.87940000  | 24.92910000  |
| 38   | 958.64020000  | 46.25940000  |
| 39   | 970.04440000  | 5.83890000   |
| 40   | 999.80720000  | 30.57010000  |
| 41   | 1003.23720000 | 18.46710000  |
| 42   | 1010.62560000 | 1.20740000   |
| 43   | 1053.09140000 | 6.81430000   |
| 44   | 1081.11780000 | 1.28210000   |
| 45   | 1116.50060000 | 56.61600000  |
| 46   | 1145.41970000 | 6.07160000   |
| 47   | 1149.86710000 | 4.39090000   |
| 48   | 1198.88040000 | 21.41190000  |
| 49   | 1232.83840000 | 27.40760000  |
| 50   | 1246.34610000 | 3.15800000   |

|    |               |              |
|----|---------------|--------------|
| 51 | 1262.38170000 | 20.78840000  |
| 52 | 1294.33640000 | 2.28610000   |
| 53 | 1300.00120000 | 5.18880000   |
| 54 | 1309.77470000 | 20.56370000  |
| 55 | 1343.89170000 | 16.10790000  |
| 56 | 1368.96000000 | 107.71030000 |
| 57 | 1402.89380000 | 67.97080000  |
| 58 | 1412.54370000 | 48.27950000  |
| 59 | 1432.24850000 | 81.91870000  |
| 60 | 1436.85900000 | 42.38420000  |
| 61 | 1447.67090000 | 25.57820000  |
| 62 | 1466.06720000 | 51.36750000  |
| 63 | 1478.66190000 | 17.27730000  |
| 64 | 1485.07360000 | 17.77410000  |
| 65 | 1487.17150000 | 36.72510000  |
| 66 | 1491.85550000 | 5.06410000   |
| 67 | 1501.31680000 | 2.63010000   |
| 68 | 1506.27550000 | 43.20100000  |
| 69 | 1519.45980000 | 35.55310000  |
| 70 | 1534.66850000 | 78.50730000  |
| 71 | 1593.48270000 | 33.90470000  |
| 72 | 1642.86930000 | 739.34560000 |
| 73 | 2642.62490000 | 4.33060000   |
| 74 | 3072.00050000 | 9.56680000   |
| 75 | 3083.45710000 | 7.13190000   |
| 76 | 3084.02240000 | 11.72220000  |
| 77 | 3091.25340000 | 35.06110000  |
| 78 | 3100.61310000 | 11.53810000  |
| 79 | 3115.60700000 | 17.43620000  |
| 80 | 3166.42260000 | 1.51500000   |
| 81 | 3168.67670000 | 12.68420000  |
| 82 | 3178.00730000 | 1.54540000   |
| 83 | 3189.51590000 | 9.09930000   |
| 84 | 3201.06530000 | 2.80930000   |
| 85 | 3207.89260000 | 6.04680000   |
| 86 | 3268.82850000 | 2.12450000   |
| 87 | 3638.03650000 | 170.91870000 |



S38. ERGOTHIONINE (1N $\epsilon$ +NA)<sub>SH</sub> (THIOL; ISOMER B) IN MEOH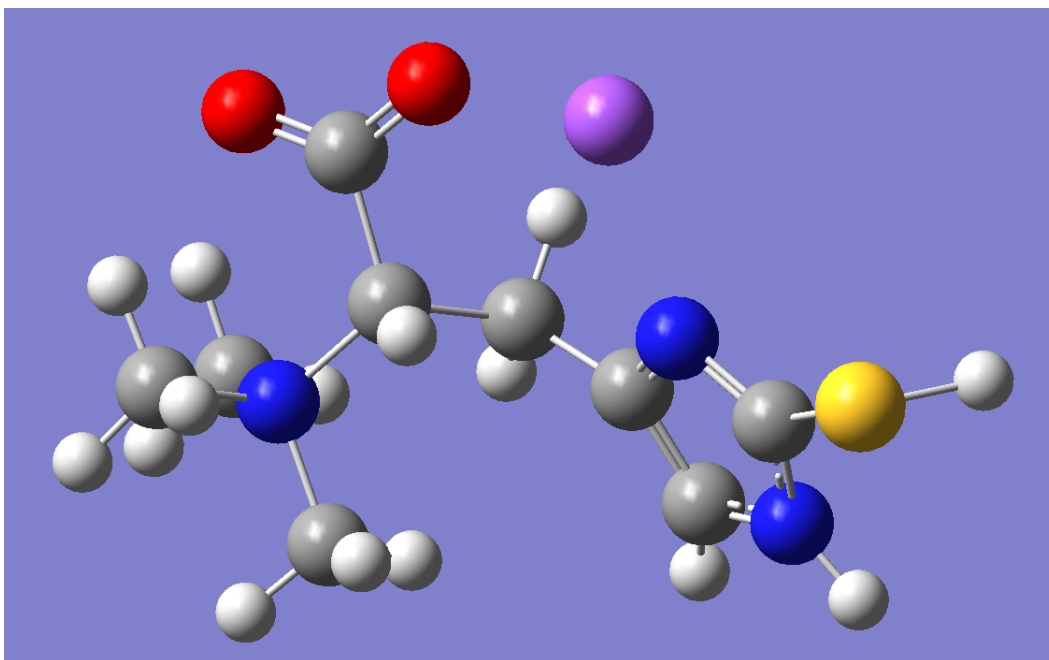

```

Route                : # opt freq b3lyp/cc-pvtz scrf=(solvent=methanol) geom=connectivity emp
                    : iricaldispersion=gd3bj int=ultrafine pop=regular
SMILES               : C[N](C)(C)C(Cc1c[nH]c(n1)S)C(=O)[O].[Na]
Formula              : C9H15N3NaO2S+
Charge               : 1
Multiplicity         : 1
Energy               : -1227.50098901
Gibbs Energy         : -1227.30134300
Number of imaginary frequencies : 0

```

a.u.  
a.u.

## S38.1. Cartesian Co-ordinates (XYZ format)

31

```

C  1.29685402 -2.07443905 -0.80730700
C  0.73420602 -0.83073503 -0.70649803
C  2.68069100 -0.70353502  0.23176000
N  2.52517390 -1.98049402 -0.19959500
H  0.94580603 -2.98965311 -1.24734998
N  1.61163795  0.01499800 -0.05765700
S  4.07823515 -0.12142300  1.13299894
C -0.58977801 -0.33907500 -1.19061506
H -1.09726596 -1.13970494 -1.72140896
H -0.42593300  0.44802099 -1.92438602
C -1.47689295  0.25007901 -0.06615200
H -0.88954699  0.31046200  0.84600198
N -2.63598299 -0.68038702  0.32666299
C -1.88943696  1.71425605 -0.40763101
O -3.07169509  1.99584496 -0.65413201
O -0.89583999  2.48439002 -0.40741500
C -2.07977891 -1.99992895  0.77214700

```

H -1.59680498 -2.49341989 -0.06152400  
 H -1.36307704 -1.82700002 1.56834400  
 H -2.90092206 -2.61083007 1.13247001  
 C -3.61149096 -0.91095197 -0.79200000  
 H -3.98457503 0.05404700 -1.10808802  
 H -3.10972190 -1.41769600 -1.60776496  
 H -4.40972185 -1.54051304 -0.41210201  
 C -3.36763310 -0.07541200 1.49269402  
 H -4.13144398 -0.77594298 1.81441796  
 H -2.65521097 0.09024300 2.29474401  
 H -3.80820894 0.85824299 1.16973305  
 H 4.97250509 -0.21922299 0.12954400  
 H 3.19315505 -2.72529197 -0.08596600  
 Na 1.28437304 2.42074895 0.16104300

### S38.2. Frequencies

| Mode | IR frequency  | IR intensity |
|------|---------------|--------------|
| 1    | 27.59450000   | 12.07090000  |
| 2    | 33.91490000   | 5.31130000   |
| 3    | 55.43510000   | 1.81050000   |
| 4    | 73.98130000   | 27.02590000  |
| 5    | 78.49650000   | 23.11510000  |
| 6    | 91.68280000   | 30.62850000  |
| 7    | 114.36120000  | 0.24560000   |
| 8    | 144.79240000  | 28.80470000  |
| 9    | 173.95690000  | 13.12560000  |
| 10   | 191.95790000  | 25.46900000  |
| 11   | 216.39320000  | 3.62170000   |
| 12   | 227.70200000  | 13.58090000  |
| 13   | 233.25610000  | 48.55870000  |
| 14   | 256.28590000  | 14.26270000  |
| 15   | 269.29990000  | 1.57380000   |
| 16   | 298.61830000  | 2.88640000   |
| 17   | 309.24100000  | 14.87670000  |
| 18   | 319.28850000  | 4.73440000   |
| 19   | 341.67890000  | 4.97780000   |
| 20   | 356.86820000  | 15.29340000  |
| 21   | 391.59510000  | 12.24130000  |
| 22   | 423.37390000  | 1.94700000   |
| 23   | 437.24530000  | 3.54110000   |
| 24   | 475.23380000  | 1.70130000   |
| 25   | 492.49800000  | 3.51730000   |
| 26   | 554.15570000  | 2.38250000   |
| 27   | 599.39890000  | 131.32650000 |
| 28   | 657.53040000  | 3.37760000   |
| 29   | 685.37200000  | 3.60500000   |
| 30   | 708.35710000  | 44.39080000  |
| 31   | 734.99640000  | 3.17930000   |
| 32   | 763.42900000  | 13.57500000  |
| 33   | 800.59390000  | 21.11740000  |
| 34   | 821.73470000  | 59.10030000  |
| 35   | 864.39640000  | 31.81980000  |
| 36   | 903.83540000  | 63.96570000  |
| 37   | 945.44010000  | 17.23240000  |
| 38   | 957.23280000  | 48.49070000  |
| 39   | 974.14650000  | 12.59330000  |
| 40   | 999.55610000  | 4.10390000   |
| 41   | 1007.84940000 | 14.97490000  |
| 42   | 1024.09050000 | 8.80190000   |
| 43   | 1048.00030000 | 2.21330000   |
| 44   | 1079.97760000 | 0.61280000   |

|    |               |              |
|----|---------------|--------------|
| 45 | 1111.53640000 | 58.10460000  |
| 46 | 1141.92900000 | 2.32200000   |
| 47 | 1152.92810000 | 6.44150000   |
| 48 | 1201.04600000 | 7.91270000   |
| 49 | 1235.55570000 | 4.67500000   |
| 50 | 1258.36240000 | 37.07840000  |
| 51 | 1270.03560000 | 16.78850000  |
| 52 | 1289.89580000 | 3.54590000   |
| 53 | 1291.53910000 | 2.19920000   |
| 54 | 1301.60930000 | 13.82300000  |
| 55 | 1352.12860000 | 9.85450000   |
| 56 | 1369.36370000 | 338.56660000 |
| 57 | 1380.28880000 | 15.67850000  |
| 58 | 1415.56190000 | 3.49170000   |
| 59 | 1432.83080000 | 45.08410000  |
| 60 | 1438.93850000 | 59.80640000  |
| 61 | 1446.98330000 | 34.40690000  |
| 62 | 1469.21710000 | 25.51020000  |
| 63 | 1480.97620000 | 7.58690000   |
| 64 | 1485.30110000 | 32.55550000  |
| 65 | 1488.59960000 | 48.76850000  |
| 66 | 1489.94550000 | 15.18480000  |
| 67 | 1497.19320000 | 5.60540000   |
| 68 | 1506.93810000 | 32.04090000  |
| 69 | 1517.66590000 | 43.89800000  |
| 70 | 1529.48350000 | 76.03690000  |
| 71 | 1602.67940000 | 45.78170000  |
| 72 | 1673.22650000 | 847.06380000 |
| 73 | 2649.66990000 | 2.62230000   |
| 74 | 3075.95610000 | 9.84700000   |
| 75 | 3081.31250000 | 11.58980000  |
| 76 | 3087.12020000 | 6.82230000   |
| 77 | 3091.06600000 | 24.92680000  |
| 78 | 3103.27570000 | 6.22680000   |
| 79 | 3123.07800000 | 15.31120000  |
| 80 | 3164.18210000 | 4.45800000   |
| 81 | 3171.29600000 | 9.67290000   |
| 82 | 3173.81980000 | 11.23330000  |
| 83 | 3191.36670000 | 6.70130000   |
| 84 | 3198.40890000 | 0.55940000   |
| 85 | 3201.76040000 | 12.30160000  |
| 86 | 3273.23360000 | 1.54640000   |
| 87 | 3638.98700000 | 171.56100000 |

S39. ERGOTHIONINE (1 + NA)<sub>s</sub> (THIONE; ISOMER C) IN MEOH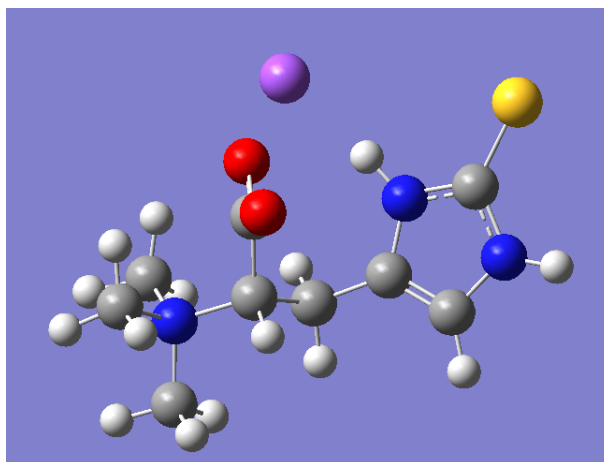

Route : # opt freq b3lyp/cc-pvtz scrf=(solvent=methanol) geom=connectivity emp  
 : iricaldispersion=gd3bj int=ultrafine pop=regular  
 SMILES : C[N](C)(C)C(Cc1c[nH]c(=S)[nH]1)C(=O)[O].[Na]  
 Formula : C<sub>9</sub>H<sub>15</sub>N<sub>3</sub>NaO<sub>2</sub>S<sup>+</sup>  
 Charge : 1  
 Multiplicity : 1  
 Energy : -1227.52112127 a.u.  
 Gibbs Energy : -1227.31647300 a.u.  
 Number of imaginary frequencies : 0

## S39.1. Cartesian Co-ordinates (XYZ format)

31

```

C  1.27904904  2.37574601 -0.60722101
C  0.60981202  1.48357904  0.15835100
C  2.79802990  0.87881702  0.15336400
N  2.61184311  1.99581397 -0.59566301
H  3.36232495  2.46269298 -1.07527399
H  0.93054199  3.23469400 -1.14821696
N  1.56272900  0.58743501  0.62599099
S  4.23769093  0.02752500  0.42291999
C -0.83459097  1.34372699  0.49470901
H -1.31890094  2.30132604  0.32306901
H -0.92278397  1.10331595  1.55216801
C -1.49387395  0.24216400 -0.34983101
H -1.52700305  0.54737502 -1.39093697
N -2.96578908  0.00895100  0.02527900
C -0.67880702 -1.07910097 -0.27360699
O -0.30462000 -1.56222999 -1.36070597
O -0.40480101 -1.51814306  0.87395900
C -3.77771497  1.21317196 -0.35512400
H -3.44972992  2.06852102  0.22244699
H -3.64899397  1.39991200 -1.41608202
H -4.81923580  1.00321996 -0.13529800
C -3.16086292 -0.27429301  1.48882306
H -2.47245908 -1.05797303  1.78074598
H -2.97231507  0.62894601  2.05631089

```

H -4.19108486 -0.58295101 1.63066602  
 C -3.47714305 -1.16538298 -0.76137799  
 H -4.54507923 -1.24834895 -0.59043199  
 H -3.27325702 -0.99737900 -1.81313896  
 H -2.97461605 -2.06320000 -0.42071500  
 H 1.34111202 -0.23239800 1.17145705  
 Na 1.21035302 -3.03399491 -0.20583300

### S39.2. Frequencies

| Mode | IR frequency  | IR intensity |
|------|---------------|--------------|
| 1    | 26.62140000   | 3.79500000   |
| 2    | 44.78510000   | 4.86690000   |
| 3    | 49.98320000   | 2.73510000   |
| 4    | 64.25060000   | 25.30930000  |
| 5    | 72.64190000   | 2.94770000   |
| 6    | 99.15040000   | 53.55780000  |
| 7    | 115.26040000  | 9.33700000   |
| 8    | 154.30230000  | 17.78820000  |
| 9    | 185.25980000  | 42.70080000  |
| 10   | 201.21030000  | 1.58070000   |
| 11   | 214.80500000  | 45.62740000  |
| 12   | 221.48190000  | 3.62310000   |
| 13   | 253.45720000  | 5.32790000   |
| 14   | 268.84850000  | 3.35130000   |
| 15   | 284.22860000  | 2.40970000   |
| 16   | 298.61040000  | 3.04750000   |
| 17   | 326.52210000  | 0.73210000   |
| 18   | 335.75350000  | 19.69870000  |
| 19   | 353.56940000  | 4.72420000   |
| 20   | 392.25450000  | 4.76400000   |
| 21   | 433.12750000  | 2.35760000   |
| 22   | 444.95340000  | 2.37650000   |
| 23   | 485.18590000  | 12.55180000  |
| 24   | 512.91780000  | 45.07970000  |
| 25   | 554.26500000  | 2.45730000   |
| 26   | 583.33310000  | 89.65570000  |
| 27   | 653.76230000  | 2.78530000   |
| 28   | 685.85470000  | 24.56770000  |
| 29   | 687.42170000  | 22.56730000  |
| 30   | 722.13870000  | 16.11820000  |
| 31   | 739.86050000  | 143.76410000 |
| 32   | 764.17010000  | 15.98560000  |
| 33   | 801.28480000  | 84.86120000  |
| 34   | 833.02400000  | 55.87280000  |
| 35   | 860.59580000  | 33.57620000  |
| 36   | 918.76250000  | 23.16240000  |
| 37   | 961.51920000  | 33.29530000  |
| 38   | 973.87680000  | 17.06140000  |
| 39   | 996.93790000  | 11.96950000  |
| 40   | 1000.19290000 | 18.34620000  |
| 41   | 1037.67600000 | 1.24840000   |
| 42   | 1065.95720000 | 5.51440000   |
| 43   | 1083.94360000 | 0.23270000   |
| 44   | 1101.20540000 | 58.78500000  |
| 45   | 1142.18740000 | 4.90510000   |
| 46   | 1159.20340000 | 1.28990000   |
| 47   | 1185.69220000 | 106.01520000 |
| 48   | 1204.05980000 | 15.20250000  |
| 49   | 1247.05530000 | 5.98490000   |
| 50   | 1265.82740000 | 1.17830000   |
| 51   | 1270.38090000 | 28.83300000  |

|    |               |              |
|----|---------------|--------------|
| 52 | 1292.00600000 | 24.29850000  |
| 53 | 1298.62330000 | 22.75770000  |
| 54 | 1337.27640000 | 45.85400000  |
| 55 | 1353.81540000 | 7.80840000   |
| 56 | 1389.35090000 | 112.09630000 |
| 57 | 1407.15700000 | 20.03800000  |
| 58 | 1417.33850000 | 125.13150000 |
| 59 | 1431.94490000 | 13.95010000  |
| 60 | 1453.93000000 | 17.11220000  |
| 61 | 1455.31280000 | 9.46750000   |
| 62 | 1479.07200000 | 23.16170000  |
| 63 | 1482.68940000 | 34.88630000  |
| 64 | 1486.21970000 | 12.43880000  |
| 65 | 1491.18150000 | 13.94800000  |
| 66 | 1499.77880000 | 8.91220000   |
| 67 | 1502.40890000 | 621.79550000 |
| 68 | 1507.09390000 | 30.92600000  |
| 69 | 1516.11630000 | 24.86310000  |
| 70 | 1529.09020000 | 64.21590000  |
| 71 | 1639.66930000 | 711.78510000 |
| 72 | 1673.65430000 | 111.93380000 |
| 73 | 3077.87130000 | 7.78360000   |
| 74 | 3087.31570000 | 9.22830000   |
| 75 | 3088.32690000 | 2.90650000   |
| 76 | 3093.09340000 | 20.59370000  |
| 77 | 3119.36810000 | 1.20030000   |
| 78 | 3134.05080000 | 9.89170000   |
| 79 | 3174.66290000 | 3.07460000   |
| 80 | 3177.37090000 | 3.10550000   |
| 81 | 3180.95530000 | 7.02270000   |
| 82 | 3184.91370000 | 2.90570000   |
| 83 | 3190.37390000 | 4.36080000   |
| 84 | 3193.80330000 | 5.02650000   |
| 85 | 3289.50020000 | 6.65430000   |
| 86 | 3588.63960000 | 286.59630000 |
| 87 | 3653.79140000 | 161.55210000 |

## S40. HERCYNINE (2 + NA) (ISOMER A)

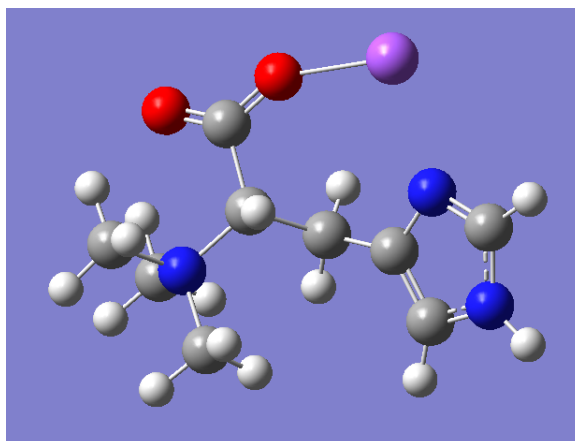

```

Route : # opt freq b3lyp/cc-pvtz geom=connectivity empiricaldispersion=gd3bj i
       : nt=ultrafine pop=regular
SMILES : C[N](C)(C)C(Cc1c[nH]cn1)C(=O)[O].[Na]
Formula : C9H15N3NaO2+
Charge : 1
Multiplicity : 1
Energy : -829.16847604 a.u.
Gibbs Energy : -828.96360300 a.u.
Number of imaginary frequencies : 0

```

## S40.1. Cartesian Co-ordinates (XYZ format)

30

```

C 2.19399309 -1.82326996 -0.42103001
C 1.55676401 -0.61347598 -0.44338900
C 3.50715590 -0.27951699 0.44082600
N 3.42762399 -1.59387600 0.14411999
H 1.89801204 -2.79720807 -0.76511198
N 2.39738798 0.34816900 0.10165200
C 0.19401100 -0.29620600 -0.97401100
H -0.14136299 -1.14945996 -1.55848300
H 0.26787901 0.53022403 -1.67862797
C -0.85062802 0.08949500 0.10662000
H -0.39216501 0.01970300 1.09037900
N -2.02411294 -0.91026002 0.19107699
C -1.30144596 1.58174503 -0.08093600
O -2.46828508 1.83788502 -0.35924599
O -0.32595000 2.36026907 0.07649900
C -1.50554299 -2.27727890 0.50719398
H -0.89788097 -2.64085698 -0.31266299
H -0.91151297 -2.22898889 1.41503501
H -2.35119510 -2.94335198 0.65200001
C -2.82694697 -0.96339899 -1.08006096
H -3.18777609 0.03821500 -1.28135002
H -2.19518900 -1.31779695 -1.88733697
H -3.64693189 -1.65976501 -0.92928803
C -2.93321300 -0.49505299 1.31954396
H -3.71701598 -1.24086797 1.41412604

```

```

H -2.34747100 -0.45534301 2.23369288
H -3.34253097 0.47846699 1.08153701
H 4.14900112 -2.27935505 0.29482299
Na 1.75036800 2.62945604 0.24748400
H 4.37725782 0.16666700 0.89098001

```

#### S40.2. Frequencies

| Mode | IR frequency  | IR intensity |
|------|---------------|--------------|
| 1    | 26.68220000   | 7.45470000   |
| 2    | 40.90870000   | 1.00680000   |
| 3    | 81.05690000   | 2.40510000   |
| 4    | 95.82360000   | 25.98890000  |
| 5    | 107.08480000  | 3.14880000   |
| 6    | 134.42140000  | 2.98330000   |
| 7    | 187.70340000  | 9.48550000   |
| 8    | 208.82230000  | 15.13120000  |
| 9    | 223.60580000  | 4.89040000   |
| 10   | 243.43270000  | 7.46690000   |
| 11   | 249.32370000  | 4.31570000   |
| 12   | 267.89160000  | 0.55110000   |
| 13   | 294.27600000  | 1.13420000   |
| 14   | 304.60250000  | 17.51420000  |
| 15   | 317.82210000  | 25.51750000  |
| 16   | 335.25590000  | 8.29020000   |
| 17   | 364.87100000  | 17.31980000  |
| 18   | 373.69640000  | 16.81720000  |
| 19   | 421.24140000  | 2.03380000   |
| 20   | 440.73850000  | 6.66830000   |
| 21   | 480.27670000  | 1.88630000   |
| 22   | 547.77150000  | 1.24650000   |
| 23   | 591.31310000  | 97.16960000  |
| 24   | 652.96220000  | 2.32240000   |
| 25   | 676.46220000  | 5.59390000   |
| 26   | 701.35400000  | 17.62170000  |
| 27   | 727.65990000  | 2.69140000   |
| 28   | 755.23880000  | 9.69290000   |
| 29   | 792.39930000  | 10.30140000  |
| 30   | 820.98460000  | 35.15860000  |
| 31   | 848.59260000  | 26.60190000  |
| 32   | 854.55450000  | 29.14300000  |
| 33   | 896.04860000  | 35.17240000  |
| 34   | 948.50770000  | 36.22020000  |
| 35   | 958.75550000  | 1.96760000   |
| 36   | 973.56800000  | 10.85550000  |
| 37   | 983.56400000  | 3.22910000   |
| 38   | 1004.86630000 | 10.38560000  |
| 39   | 1038.07630000 | 2.44510000   |
| 40   | 1075.74260000 | 0.60300000   |
| 41   | 1105.33300000 | 29.64780000  |
| 42   | 1136.14170000 | 1.61190000   |
| 43   | 1148.74640000 | 4.18260000   |
| 44   | 1160.39980000 | 11.43970000  |
| 45   | 1210.25140000 | 8.09180000   |
| 46   | 1243.68500000 | 15.23900000  |
| 47   | 1251.78730000 | 4.80340000   |
| 48   | 1261.83700000 | 9.15970000   |
| 49   | 1282.56480000 | 1.39750000   |
| 50   | 1289.13390000 | 1.04790000   |
| 51   | 1306.40750000 | 0.20820000   |
| 52   | 1347.72800000 | 4.05240000   |
| 53   | 1363.86860000 | 201.24530000 |



|    |               |              |
|----|---------------|--------------|
| 54 | 1370.21460000 | 21.30980000  |
| 55 | 1403.29400000 | 12.84740000  |
| 56 | 1428.58640000 | 10.87160000  |
| 57 | 1442.99250000 | 23.19690000  |
| 58 | 1470.59460000 | 20.62100000  |
| 59 | 1472.55060000 | 19.84490000  |
| 60 | 1477.36070000 | 25.13640000  |
| 61 | 1489.25520000 | 5.35200000   |
| 62 | 1494.24050000 | 3.44630000   |
| 63 | 1505.83560000 | 8.41490000   |
| 64 | 1509.59130000 | 14.88610000  |
| 65 | 1523.34540000 | 24.51610000  |
| 66 | 1529.86360000 | 28.98000000  |
| 67 | 1541.70850000 | 48.48110000  |
| 68 | 1602.64930000 | 19.11910000  |
| 69 | 1754.48400000 | 507.07600000 |
| 70 | 3071.88750000 | 6.30840000   |
| 71 | 3073.70110000 | 3.77540000   |
| 72 | 3076.34760000 | 5.36660000   |
| 73 | 3082.00250000 | 18.57910000  |
| 74 | 3092.53150000 | 6.67040000   |
| 75 | 3111.73430000 | 10.33270000  |
| 76 | 3154.23100000 | 0.65730000   |
| 77 | 3159.35080000 | 6.72230000   |
| 78 | 3163.52820000 | 7.34910000   |
| 79 | 3179.06040000 | 6.59800000   |
| 80 | 3184.83950000 | 5.41910000   |
| 81 | 3192.11760000 | 18.30350000  |
| 82 | 3252.90030000 | 1.97860000   |
| 83 | 3271.34490000 | 2.07340000   |
| 84 | 3642.15860000 | 127.12840000 |

## S41. HERCYNINE (2 + NA) (ISOMER B)

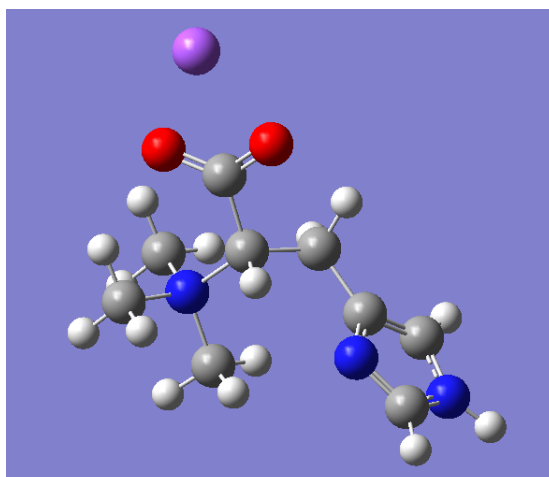

```

Route           : # opt freq b3lyp/cc-pvtz geom=connectivity empiricaldispersion=gd3bj i
                 : nt=ultrafine pop=regular
SMILES          : C[N](C)(C)C(Cc1c[nH]cn1)C(=O)[O].[Na]
Formula        : C9H15N3NaO2+
Charge         : 1
Multiplicity   : 1
Energy         : -829.16831346 a.u.
Gibbs Energy   : -828.96474800 a.u.
Number of imaginary frequencies : 0

```

## S41.1. Cartesian Co-ordinates (XYZ format)

30

```

C  3.10177207 -0.83318102  1.07323205
C  1.95587695 -0.63584101  0.35029101
C  3.56740904 -0.64990801 -1.07586205
N  4.12117100 -0.84325403  0.14695799
H  5.09855604 -0.97756600  0.34357899
H  3.28022289 -0.98222297  2.12249804
N  2.26235795 -0.51850402 -0.98681402
C  0.53368098 -0.61775899  0.82858002
H  0.46578401 -0.19981200  1.83343005
H  0.17645000 -1.64396405  0.90170199
C -0.44505200  0.06248500 -0.13780600
H -0.05553800 -0.09578500 -1.14244998
N -0.50523102  1.59867501  0.00479800
C -1.83054900 -0.62926501 -0.09458700
O -2.88521504  0.03322500  0.10468800
O -1.78550100 -1.86206996 -0.29516101
C  0.87616402  2.18271995 -0.08403900
H  1.45786095  1.86815798  0.77391797
H  1.35157895  1.82627702 -0.99077803
H  0.78007698  3.26446009 -0.09237900
C -1.11937296  2.03566003  1.30346596
H -2.12913489  1.64982200  1.35123599
H -0.51944900  1.65406299  2.12228394

```

```

H -1.11336505  3.12159395  1.32773995
C -1.30180299  2.16725802 -1.13813996
H -1.29328406  3.24987698 -1.05250704
H -0.82448900  1.86683905 -2.06634402
H -2.31128192  1.78291202 -1.07893598
Na -4.02111292 -1.93561900 -0.13667400
H  4.14740705 -0.61042500 -1.98183596

```

#### S41.2. Frequencies

| Mode | IR frequency  | IR intensity |
|------|---------------|--------------|
| 1    | 9.88910000    | 2.44500000   |
| 2    | 46.11400000   | 3.83850000   |
| 3    | 58.42890000   | 9.16680000   |
| 4    | 78.39470000   | 20.95180000  |
| 5    | 105.05460000  | 1.98610000   |
| 6    | 133.72410000  | 11.54300000  |
| 7    | 152.37370000  | 7.44890000   |
| 8    | 218.95270000  | 11.80780000  |
| 9    | 227.97400000  | 7.40300000   |
| 10   | 248.98060000  | 4.12120000   |
| 11   | 265.26340000  | 12.71270000  |
| 12   | 270.93540000  | 15.17400000  |
| 13   | 290.76420000  | 7.38560000   |
| 14   | 309.09290000  | 6.02230000   |
| 15   | 322.88890000  | 4.20540000   |
| 16   | 333.90330000  | 7.63250000   |
| 17   | 370.30530000  | 11.98910000  |
| 18   | 399.40500000  | 37.87700000  |
| 19   | 422.47040000  | 1.27100000   |
| 20   | 437.08780000  | 4.05490000   |
| 21   | 504.38230000  | 2.85320000   |
| 22   | 560.11750000  | 1.67290000   |
| 23   | 574.46030000  | 93.75620000  |
| 24   | 647.07020000  | 5.05790000   |
| 25   | 679.02570000  | 1.31360000   |
| 26   | 706.26960000  | 15.74470000  |
| 27   | 718.88540000  | 20.43140000  |
| 28   | 736.51990000  | 15.06030000  |
| 29   | 771.04660000  | 5.62060000   |
| 30   | 831.59210000  | 29.27860000  |
| 31   | 844.27460000  | 25.71880000  |
| 32   | 855.65650000  | 11.76020000  |
| 33   | 925.54100000  | 33.81650000  |
| 34   | 954.31480000  | 27.97410000  |
| 35   | 962.74090000  | 5.16910000   |
| 36   | 974.86430000  | 7.27160000   |
| 37   | 987.70970000  | 9.49070000   |
| 38   | 1005.51360000 | 21.55160000  |
| 39   | 1071.31600000 | 4.32790000   |
| 40   | 1080.44340000 | 0.25690000   |
| 41   | 1097.67480000 | 27.05430000  |
| 42   | 1137.95830000 | 4.38410000   |
| 43   | 1142.46650000 | 5.89050000   |
| 44   | 1157.63800000 | 5.92090000   |
| 45   | 1211.91850000 | 2.13790000   |
| 46   | 1247.23430000 | 2.44890000   |
| 47   | 1253.14770000 | 29.00410000  |
| 48   | 1276.27420000 | 0.07990000   |
| 49   | 1289.37010000 | 9.10670000   |
| 50   | 1299.60750000 | 6.29210000   |
| 51   | 1305.07610000 | 6.20500000   |

|    |               |              |
|----|---------------|--------------|
| 52 | 1335.44750000 | 3.18170000   |
| 53 | 1387.18120000 | 159.65450000 |
| 54 | 1392.08430000 | 3.07930000   |
| 55 | 1420.47770000 | 84.21270000  |
| 56 | 1436.59430000 | 10.33800000  |
| 57 | 1451.26410000 | 25.33010000  |
| 58 | 1460.78400000 | 25.25080000  |
| 59 | 1474.43320000 | 13.09310000  |
| 60 | 1479.48700000 | 2.03280000   |
| 61 | 1489.45170000 | 45.99110000  |
| 62 | 1496.63970000 | 10.51940000  |
| 63 | 1503.68640000 | 5.57980000   |
| 64 | 1510.43200000 | 8.55910000   |
| 65 | 1519.29900000 | 17.48050000  |
| 66 | 1522.44430000 | 22.27460000  |
| 67 | 1541.48000000 | 56.87220000  |
| 68 | 1592.91510000 | 16.01010000  |
| 69 | 1644.93950000 | 424.61650000 |
| 70 | 3056.59230000 | 11.36880000  |
| 71 | 3076.42510000 | 5.17150000   |
| 72 | 3080.32030000 | 3.31590000   |
| 73 | 3085.18960000 | 19.16170000  |
| 74 | 3088.23240000 | 18.76070000  |
| 75 | 3093.88760000 | 1.77560000   |
| 76 | 3157.74430000 | 2.81980000   |
| 77 | 3163.43020000 | 2.44930000   |
| 78 | 3170.68730000 | 4.01190000   |
| 79 | 3187.12370000 | 2.93490000   |
| 80 | 3196.09610000 | 0.94160000   |
| 81 | 3199.71010000 | 11.95520000  |
| 82 | 3253.11960000 | 1.07230000   |
| 83 | 3267.73100000 | 0.73380000   |
| 84 | 3644.91480000 | 104.03240000 |

## S42. HERCYNINE (2 + NA) (ISOMER C)

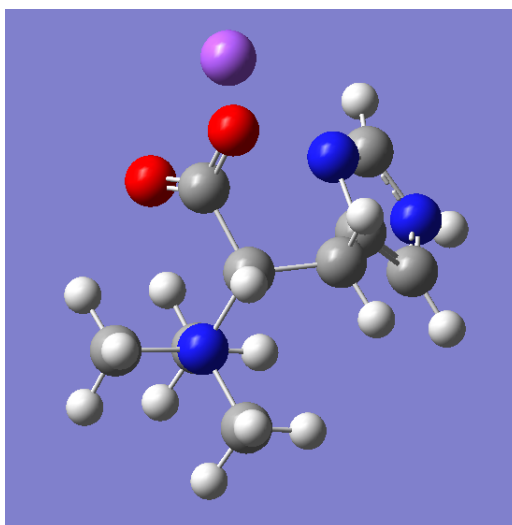

```

Route                : # opt freq b3lyp/cc-pvtz geom=connectivity empiricaldispersion=gd3bj i
                    : nt=ultrafine pop=regular
SMILES               : C[N](C)(C)C(Cc1c[nH]cn1)C(=O)[O].[Na]
Formula              : C9H15N3NaO2+
Charge               : 1
Multiplicity         : 1
Energy               : -829.17670870
Gibbs Energy         : -828.96976900
Number of imaginary frequencies : 0

```

a.u.  
a.u.

## S42.1. Cartesian Co-ordinates (XYZ format)

30

```

C  1.90746999 -1.98552895  0.35663101
C  1.27009106 -0.79341602  0.57238197
C  3.03961205 -0.35659000 -0.59462899
N  3.02590489 -1.69204605 -0.38725400
H  3.72162199 -2.34835196 -0.70001602
H  1.68142295 -2.98590302  0.67821002
N  1.99907398  0.22372000 -0.03083300
C  0.04279500 -0.58458602  1.40891397
H  0.30283201  0.05708100  2.25088096
H -0.24676099 -1.54216599  1.83827198
C -1.17498600  0.13328999  0.79267502
H -1.87744701  0.32197699  1.60122502
N -1.99939299 -0.69234699 -0.21449600
C -0.70161998  1.50718296  0.26159000
O -0.64614803  1.71371698 -0.97358900
O -0.28103501  2.25036407  1.16904604
C -2.54120111 -1.91358602  0.46126601
H -1.72599399 -2.57784200  0.72262299
H -3.08359003 -1.61670399  1.35424697
H -3.21245408 -2.41889811 -0.22682901
C -1.21841395 -1.11886799 -1.42720401
H -0.80862999 -0.22766601 -1.88550699

```

H -0.42682201 -1.78919804 -1.11563504  
 H -1.90248203 -1.63235402 -2.09719491  
 C -3.16738296 0.14676100 -0.66192001  
 H -3.79460406 -0.45993099 -1.30838501  
 H -3.72805500 0.45531800 0.21589801  
 H -2.78256512 1.00837600 -1.19314897  
 Na 1.41285896 2.60709906 -0.29419899  
 H 3.81826210 0.13736200 -1.15045500

### S42.2. Frequencies

| Mode | IR frequency  | IR intensity |
|------|---------------|--------------|
| 1    | 40.97540000   | 2.44630000   |
| 2    | 73.41750000   | 1.08900000   |
| 3    | 84.20770000   | 1.14290000   |
| 4    | 117.18590000  | 19.68080000  |
| 5    | 140.53230000  | 14.81730000  |
| 6    | 156.21750000  | 13.15060000  |
| 7    | 168.44090000  | 5.98840000   |
| 8    | 221.39510000  | 2.15980000   |
| 9    | 231.97470000  | 2.91420000   |
| 10   | 244.54620000  | 9.78140000   |
| 11   | 263.52290000  | 9.07770000   |
| 12   | 279.74120000  | 1.74950000   |
| 13   | 285.76660000  | 13.81190000  |
| 14   | 300.68310000  | 20.17890000  |
| 15   | 319.65330000  | 9.03140000   |
| 16   | 334.43380000  | 5.43710000   |
| 17   | 375.74200000  | 19.98890000  |
| 18   | 385.83390000  | 13.05480000  |
| 19   | 427.92150000  | 3.21750000   |
| 20   | 433.56800000  | 0.81690000   |
| 21   | 529.09190000  | 2.73860000   |
| 22   | 576.81500000  | 6.03060000   |
| 23   | 585.39050000  | 94.90990000  |
| 24   | 627.67160000  | 6.92900000   |
| 25   | 669.47830000  | 3.06010000   |
| 26   | 708.01670000  | 9.69430000   |
| 27   | 729.10490000  | 12.48640000  |
| 28   | 736.01350000  | 2.53960000   |
| 29   | 783.57910000  | 10.37790000  |
| 30   | 834.25990000  | 43.41610000  |
| 31   | 845.51150000  | 11.02990000  |
| 32   | 867.76430000  | 17.61860000  |
| 33   | 903.11380000  | 27.15020000  |
| 34   | 957.52630000  | 12.79510000  |
| 35   | 960.93560000  | 17.20820000  |
| 36   | 969.38910000  | 8.50640000   |
| 37   | 986.77410000  | 6.87670000   |
| 38   | 994.94480000  | 19.05030000  |
| 39   | 1046.01500000 | 5.12630000   |
| 40   | 1077.62830000 | 1.31630000   |
| 41   | 1106.15990000 | 27.33660000  |
| 42   | 1139.40390000 | 3.88350000   |
| 43   | 1147.89060000 | 2.22530000   |
| 44   | 1155.11850000 | 14.76390000  |
| 45   | 1210.66980000 | 21.70180000  |
| 46   | 1247.25980000 | 2.55400000   |
| 47   | 1253.04410000 | 7.46380000   |
| 48   | 1265.08040000 | 11.60150000  |
| 49   | 1293.15860000 | 0.44690000   |
| 50   | 1299.37050000 | 0.66440000   |

|    |               |              |
|----|---------------|--------------|
| 51 | 1312.42750000 | 2.97350000   |
| 52 | 1337.93790000 | 2.88000000   |
| 53 | 1369.89200000 | 60.46070000  |
| 54 | 1401.72270000 | 8.35120000   |
| 55 | 1413.79250000 | 75.36770000  |
| 56 | 1435.65680000 | 12.16770000  |
| 57 | 1446.96700000 | 12.02010000  |
| 58 | 1466.75820000 | 42.21720000  |
| 59 | 1471.94730000 | 17.26160000  |
| 60 | 1478.17940000 | 11.83650000  |
| 61 | 1485.91440000 | 18.76620000  |
| 62 | 1495.72250000 | 1.32720000   |
| 63 | 1505.63990000 | 4.32560000   |
| 64 | 1509.31400000 | 21.97740000  |
| 65 | 1523.31270000 | 19.08410000  |
| 66 | 1529.40250000 | 25.05100000  |
| 67 | 1542.00920000 | 48.42220000  |
| 68 | 1597.25710000 | 10.55420000  |
| 69 | 1682.82280000 | 388.06820000 |
| 70 | 3064.93230000 | 5.95030000   |
| 71 | 3073.95950000 | 4.12400000   |
| 72 | 3077.56360000 | 3.07780000   |
| 73 | 3082.99070000 | 22.62530000  |
| 74 | 3098.81280000 | 3.43960000   |
| 75 | 3101.17630000 | 10.93410000  |
| 76 | 3156.11880000 | 0.26180000   |
| 77 | 3161.40460000 | 5.67850000   |
| 78 | 3169.68480000 | 2.44900000   |
| 79 | 3179.36190000 | 5.68450000   |
| 80 | 3189.22580000 | 2.91090000   |
| 81 | 3196.17740000 | 7.94360000   |
| 82 | 3249.15830000 | 1.12370000   |
| 83 | 3267.70650000 | 2.29620000   |
| 84 | 3644.04320000 | 124.35190000 |

## S43. METHYL-HERCYNINE (3 + NA) (ISOMER A)

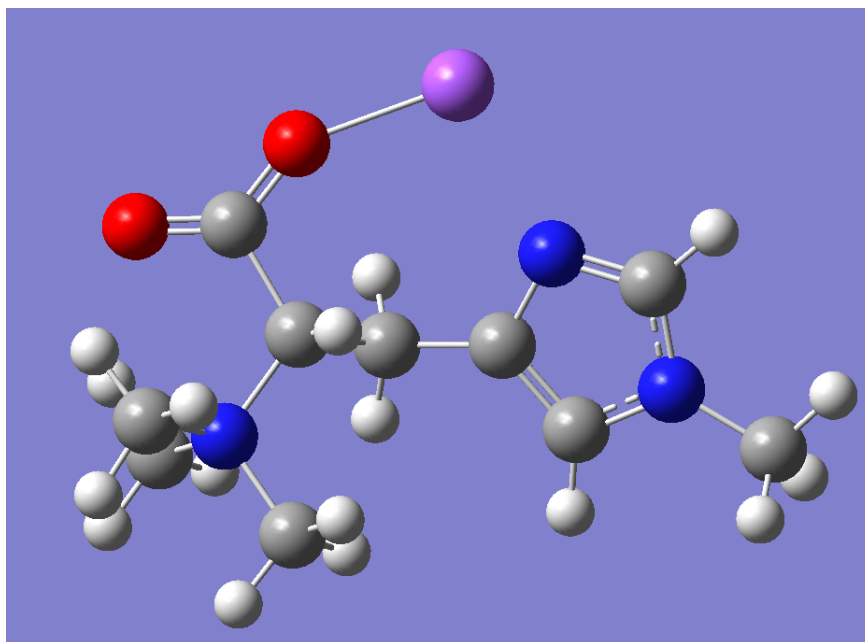

```

Route                : # opt freq b3lyp/cc-pvtz geom=connectivity empiricaldispersion=gd3bj i
                    : nt=ultrafine pop=regular
SMILES               : Cn1cc(nc1)CC(C(=O)[O])[N](C)(C)C.[Na]
Formula              : C10H17N3NaO2+
Charge               : 1
Multiplicity         : 1
Energy               : -868.49909087 a.u.
Gibbs Energy         : -868.26926300 a.u.
Number of imaginary frequencies : 0

```

## S43.1. Cartesian Co-ordinates (XYZ format)

33

```

C  2.20797992 -1.17669797 -0.51875401
C  1.31601596 -0.13858500 -0.49635601
C  3.16003108  0.58376598  0.37183499
N  3.37674189 -0.70498198  0.03648200
H  2.12760806 -2.18217993 -0.89091498
N  1.93146706  0.96718198  0.06814600
C -0.09274500 -0.11639400 -1.00080299
H -0.24640600 -1.01058602 -1.60005498
H -0.21441001  0.71987998 -1.68707597
C -1.17578399  0.01252800  0.10272700
H -0.69337797  0.03504400  1.07724202
N -2.09330511 -1.22627699  0.19080500
C -1.95361698  1.36757302 -0.05146900
O -3.15365005  1.35812497 -0.30676401
O -1.17589200  2.34386706  0.10471400
C -1.27396500 -2.44509292  0.47428200
H -0.61445999 -2.64918995 -0.36054400
H -0.68939000 -2.27662611  1.37385499

```



```

H -1.94463503 -3.28710699 0.61934102
C -2.88989401 -1.44257402 -1.06680202
H -3.46952009 -0.54467702 -1.24526095
H -2.21156001 -1.63659203 -1.89054406
H -3.53008103 -2.30665588 -0.91321802
C -3.04872298 -1.04025698 1.34146500
H -3.64315104 -1.94418800 1.43725705
H -2.46811604 -0.88122499 2.24586892
H -3.67083311 -0.18062800 1.12691498
Na 0.80241698 3.03805399 0.27253199
H 3.92055297 1.19616604 0.82628000
C 4.61434698 -1.45314503 0.20841500
H 5.35457420 -0.80741102 0.67210501
H 4.44702816 -2.31665301 0.84909397
H 4.98969507 -1.78564894 -0.75730801

```

### S43.2. Frequencies

| Mode | IR frequency  | IR intensity |
|------|---------------|--------------|
| 1    | 24.04500000   | 6.70990000   |
| 2    | 39.08630000   | 1.24260000   |
| 3    | 65.70510000   | 2.93610000   |
| 4    | 79.85390000   | 3.17140000   |
| 5    | 92.46580000   | 18.65300000  |
| 6    | 103.59860000  | 5.27400000   |
| 7    | 125.67480000  | 1.20460000   |
| 8    | 167.19570000  | 11.49270000  |
| 9    | 188.05780000  | 4.35180000   |
| 10   | 206.23190000  | 9.50880000   |
| 11   | 219.41320000  | 11.97940000  |
| 12   | 239.95020000  | 7.84730000   |
| 13   | 250.46030000  | 0.57850000   |
| 14   | 266.83330000  | 0.22200000   |
| 15   | 292.41560000  | 0.27350000   |
| 16   | 302.34390000  | 16.97090000  |
| 17   | 322.95410000  | 20.24870000  |
| 18   | 334.55740000  | 2.96360000   |
| 19   | 339.69760000  | 10.72170000  |
| 20   | 364.34530000  | 24.13470000  |
| 21   | 411.07040000  | 3.45400000   |
| 22   | 423.06440000  | 2.64850000   |
| 23   | 441.39690000  | 5.22570000   |
| 24   | 482.19650000  | 1.29630000   |
| 25   | 547.42490000  | 1.50400000   |
| 26   | 622.21220000  | 4.33780000   |
| 27   | 645.47760000  | 17.06910000  |
| 28   | 683.33700000  | 1.79110000   |
| 29   | 710.08830000  | 15.06780000  |
| 30   | 747.86940000  | 11.72110000  |
| 31   | 757.65800000  | 13.78220000  |
| 32   | 789.19160000  | 8.74770000   |
| 33   | 822.36990000  | 33.19960000  |
| 34   | 843.84020000  | 28.04770000  |
| 35   | 854.13620000  | 31.66000000  |
| 36   | 897.06530000  | 35.40630000  |
| 37   | 949.67780000  | 34.85810000  |
| 38   | 973.68850000  | 12.48130000  |
| 39   | 981.16230000  | 3.37570000   |
| 40   | 1020.17640000 | 20.36570000  |
| 41   | 1039.05120000 | 3.46380000   |
| 42   | 1070.49420000 | 2.83240000   |
| 43   | 1075.97630000 | 0.51040000   |

|    |               |              |
|----|---------------|--------------|
| 44 | 1091.11170000 | 5.22870000   |
| 45 | 1136.24010000 | 2.00980000   |
| 46 | 1148.98450000 | 4.46940000   |
| 47 | 1152.33420000 | 0.03870000   |
| 48 | 1185.80160000 | 18.72900000  |
| 49 | 1215.46430000 | 15.74590000  |
| 50 | 1243.52830000 | 15.08180000  |
| 51 | 1253.41240000 | 6.76850000   |
| 52 | 1270.39720000 | 18.96500000  |
| 53 | 1282.39140000 | 1.69900000   |
| 54 | 1290.13970000 | 1.89990000   |
| 55 | 1327.15570000 | 23.54320000  |
| 56 | 1358.53280000 | 88.28550000  |
| 57 | 1367.47980000 | 119.06920000 |
| 58 | 1377.33800000 | 6.31750000   |
| 59 | 1402.10310000 | 12.95910000  |
| 60 | 1417.26930000 | 2.79430000   |
| 61 | 1428.51400000 | 11.50620000  |
| 62 | 1443.05530000 | 24.22730000  |
| 63 | 1461.64020000 | 15.94400000  |
| 64 | 1470.17550000 | 21.31240000  |
| 65 | 1477.12680000 | 21.87500000  |
| 66 | 1488.53530000 | 8.74510000   |
| 67 | 1488.80820000 | 10.49550000  |
| 68 | 1494.08900000 | 4.04040000   |
| 69 | 1505.17690000 | 8.38930000   |
| 70 | 1509.03360000 | 13.59260000  |
| 71 | 1518.23020000 | 11.23270000  |
| 72 | 1522.93050000 | 24.46380000  |
| 73 | 1541.34800000 | 45.96950000  |
| 74 | 1547.56740000 | 85.56490000  |
| 75 | 1599.64110000 | 6.63650000   |
| 76 | 1753.32910000 | 510.76650000 |
| 77 | 3057.82850000 | 20.11900000  |
| 78 | 3071.47400000 | 4.98200000   |
| 79 | 3072.62980000 | 5.31830000   |
| 80 | 3076.00060000 | 5.91540000   |
| 81 | 3081.52500000 | 18.27060000  |
| 82 | 3091.97360000 | 6.78350000   |
| 83 | 3110.36860000 | 10.82840000  |
| 84 | 3124.41390000 | 4.92080000   |
| 85 | 3148.50390000 | 2.72100000   |
| 86 | 3153.86660000 | 0.75100000   |
| 87 | 3159.08060000 | 6.78910000   |
| 88 | 3163.08080000 | 7.93280000   |
| 89 | 3179.20050000 | 6.49960000   |
| 90 | 3184.29120000 | 5.46050000   |
| 91 | 3191.71620000 | 18.03810000  |
| 92 | 3244.58240000 | 1.26410000   |
| 93 | 3261.44910000 | 2.01500000   |

## S44. METHYL-HERCYNINE (3 + NA) (ISOMER B)

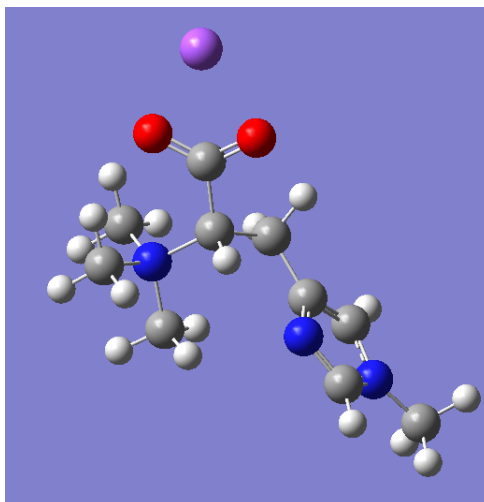

```

Route : # opt freq b3lyp/cc-pvtz geom=connectivity empiricaldispersion=gd3bj i
       : nt=ultrafine pop=regular
SMILES : Cn1cc(nc1)CC(C(=O)[O])[N](C)(C)C.[Na]
Formula : C10H17N3NaO2+
Charge : 1
Multiplicity : 1
Energy : -868.49796175 a.u.
Gibbs Energy : -868.26934900 a.u.
Number of imaginary frequencies : 0

```

## S44.1. Cartesian Co-ordinates (XYZ format)

33

```

C -2.81360102 0.61010402 0.95935100
C -1.63323700 0.44758299 0.28163999
C -3.19923806 0.32095900 -1.18248200
N -3.80928111 0.53109097 0.00989600
H -3.03335690 0.78983301 1.99652600
N -1.88928103 0.26258799 -1.05563402
C -0.22865701 0.52320802 0.80666798
H -0.16350500 0.10040800 1.80996501
H 0.05595900 1.57008195 0.89981002
C 0.81961399 -0.08395000 -0.13461301
H 0.43426499 0.03179400 -1.14690602
N 0.99713701 -1.60934496 0.02731800
C 2.14573693 0.71407503 -0.08144100
O 3.24993801 0.13325500 0.10604300
O 2.00545812 1.94216895 -0.26741499
C -0.33578700 -2.29806900 -0.05288000
H -0.94038397 -2.01594090 0.80060101
H -0.83604503 -1.99100697 -0.96424198
H -0.15728900 -3.36932993 -0.04487200
C 1.64179504 -1.98008597 1.33156598
H 2.62224388 -1.52409506 1.37051105
H 1.01794696 -1.62635398 2.14510393
H 1.71120703 -3.06322908 1.37478304

```

```

C  1.83514500 -2.13077593 -1.10817599
H  1.91266799 -3.20925093 -1.00581503
H  1.33441305 -1.88360596 -2.03970194
H  2.81089592 -1.66646898 -1.05700302
Na 4.22910118  2.18357301 -0.12192700
H -3.75091100  0.21562099 -2.10149503
C -5.23745584  0.66502702  0.24549200
H -5.46698809  1.65375197  0.63913900
H -5.76270390  0.53080201 -0.69610298
H -5.57912493 -0.09074900  0.95062703

```

#### S44.2. Frequencies

| Mode | IR frequency  | IR intensity |
|------|---------------|--------------|
| 1    | 9.17520000    | 2.55670000   |
| 2    | 36.13580000   | 2.29660000   |
| 3    | 55.48240000   | 7.50590000   |
| 4    | 75.62870000   | 16.33060000  |
| 5    | 84.56260000   | 5.81410000   |
| 6    | 99.98740000   | 1.91870000   |
| 7    | 129.10590000  | 7.98870000   |
| 8    | 146.72670000  | 6.75930000   |
| 9    | 168.63630000  | 10.82160000  |
| 10   | 215.61960000  | 10.68780000  |
| 11   | 222.30260000  | 0.18070000   |
| 12   | 252.47430000  | 7.80560000   |
| 13   | 261.57980000  | 6.45270000   |
| 14   | 275.71880000  | 11.33860000  |
| 15   | 292.51450000  | 8.93720000   |
| 16   | 301.96880000  | 4.83310000   |
| 17   | 311.75230000  | 6.43530000   |
| 18   | 330.52360000  | 4.40400000   |
| 19   | 363.70080000  | 10.83630000  |
| 20   | 388.74340000  | 5.28800000   |
| 21   | 400.24110000  | 37.32610000  |
| 22   | 428.73900000  | 2.28040000   |
| 23   | 440.53250000  | 2.34200000   |
| 24   | 508.78900000  | 2.79300000   |
| 25   | 559.48090000  | 1.43460000   |
| 26   | 631.58280000  | 8.88930000   |
| 27   | 648.53900000  | 7.67510000   |
| 28   | 677.37690000  | 5.37360000   |
| 29   | 702.68310000  | 19.67460000  |
| 30   | 733.58610000  | 16.68070000  |
| 31   | 755.29540000  | 23.32340000  |
| 32   | 765.99450000  | 4.98820000   |
| 33   | 833.48880000  | 27.20500000  |
| 34   | 838.73150000  | 25.57330000  |
| 35   | 855.99770000  | 13.77070000  |
| 36   | 925.99220000  | 33.33630000  |
| 37   | 955.26950000  | 29.67640000  |
| 38   | 974.74590000  | 9.75610000   |
| 39   | 1001.05640000 | 15.04920000  |
| 40   | 1005.88720000 | 18.12690000  |
| 41   | 1068.50930000 | 0.72840000   |
| 42   | 1075.03690000 | 7.82590000   |
| 43   | 1080.60240000 | 0.92540000   |
| 44   | 1084.50230000 | 9.94040000   |
| 45   | 1141.20540000 | 1.00690000   |
| 46   | 1151.18060000 | 0.69430000   |
| 47   | 1155.75830000 | 16.19940000  |
| 48   | 1178.24500000 | 13.46050000  |

|    |               |              |
|----|---------------|--------------|
| 49 | 1221.01200000 | 2.55390000   |
| 50 | 1248.08400000 | 7.95850000   |
| 51 | 1258.05740000 | 31.43510000  |
| 52 | 1276.46370000 | 0.03500000   |
| 53 | 1289.27130000 | 14.38880000  |
| 54 | 1300.75620000 | 12.95880000  |
| 55 | 1321.09130000 | 16.41220000  |
| 56 | 1357.80540000 | 15.03660000  |
| 57 | 1386.83440000 | 158.73060000 |
| 58 | 1396.84150000 | 5.14000000   |
| 59 | 1417.43430000 | 19.64400000  |
| 60 | 1421.79170000 | 69.64140000  |
| 61 | 1436.83990000 | 10.47890000  |
| 62 | 1451.14870000 | 25.07170000  |
| 63 | 1458.97770000 | 26.26880000  |
| 64 | 1475.09550000 | 15.85740000  |
| 65 | 1478.34950000 | 1.13690000   |
| 66 | 1488.80510000 | 6.42230000   |
| 67 | 1489.44380000 | 48.94750000  |
| 68 | 1497.09370000 | 10.74510000  |
| 69 | 1503.50520000 | 6.36950000   |
| 70 | 1510.20070000 | 7.98460000   |
| 71 | 1518.94230000 | 9.68850000   |
| 72 | 1520.78130000 | 20.54810000  |
| 73 | 1533.96720000 | 75.44440000  |
| 74 | 1541.64810000 | 50.60760000  |
| 75 | 1587.92810000 | 5.01810000   |
| 76 | 1643.22560000 | 423.72430000 |
| 77 | 3052.23980000 | 32.52060000  |
| 78 | 3054.64690000 | 13.22900000  |
| 79 | 3076.25920000 | 5.41680000   |
| 80 | 3079.81180000 | 4.00840000   |
| 81 | 3083.41640000 | 18.45380000  |
| 82 | 3087.26980000 | 21.95060000  |
| 83 | 3093.09480000 | 2.28020000   |
| 84 | 3115.03520000 | 8.08640000   |
| 85 | 3142.81160000 | 4.17830000   |
| 86 | 3157.44980000 | 2.88970000   |
| 87 | 3162.92180000 | 2.49220000   |
| 88 | 3170.45190000 | 4.05720000   |
| 89 | 3186.92030000 | 3.78650000   |
| 90 | 3196.62940000 | 1.09830000   |
| 91 | 3200.36470000 | 11.73660000  |
| 92 | 3243.91730000 | 1.06390000   |
| 93 | 3258.49080000 | 0.64580000   |

## S45. METHYL-HERCYNINE (3 + NA) (ISOMER C)

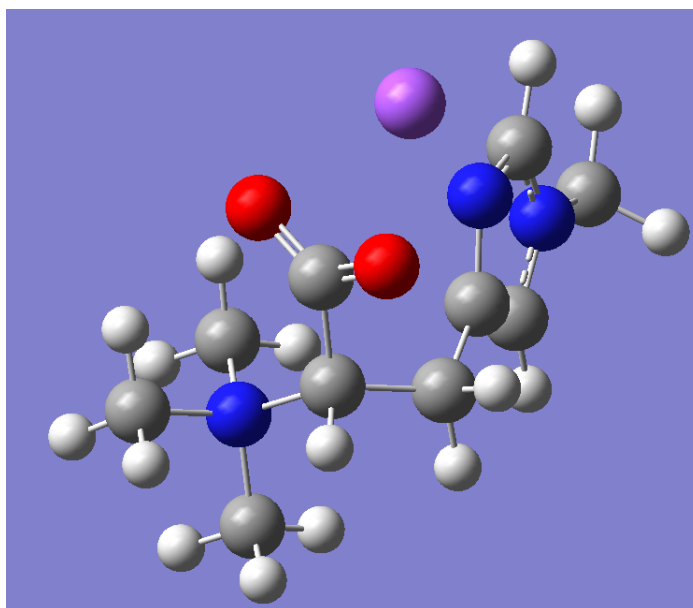

```

Route                : # opt freq b3lyp/cc-pvtz geom=connectivity empiricaldispersion=gd3bj i
                    : nt=ultrafine pop=regular
SMILES               : Cn1cc(nc1)CC(C(=O)[O])[N](C)(C)C.[Na]
Formula              : C10H17N3NaO2+
Charge               : 1
Multiplicity         : 1
Energy               : -868.50715200 a.u.
Gibbs Energy        : -868.27509500 a.u.
Number of imaginary frequencies : 0

```

## S45.1. Cartesian Co-ordinates (XYZ format)

33

```

C  2.08848500 -1.18490899  0.60115099
C  1.10098100 -0.24118800  0.71231502
C  2.71799588  0.65409797 -0.40371299
N  3.11197710 -0.60481000 -0.11212100
H  2.16158199 -2.18896198  0.97953999
N  1.51511204  0.91774398  0.07464500
C -0.17988200 -0.38499901  1.47934794
H -0.18406200  0.34503400  2.28891301
H -0.18692800 -1.36363006  1.95631897
C -1.51885200 -0.11230500  0.76442200
H -2.29565001 -0.12081400  1.52568495
N -1.97820795 -1.19691801 -0.22998300
C -1.46508896  1.31736398  0.17490800
O -1.40926802  1.47953796 -1.06696606
O -1.34557998  2.19209790  1.05421400
C -2.14612794 -2.49925590  0.48907501
H -1.17963505 -2.85942888  0.82099098
H -2.80488896 -2.35483193  1.34052896
H -2.58342195 -3.21807289 -0.19758800

```

```

C -1.03023899 -1.40059400 -1.38008201
H -0.89848799 -0.44484201 -1.87135696
H -0.08672000 -1.76679397 -0.99437898
H -1.47375798 -2.13411808 -2.04779005
C -3.32188797 -0.79180700 -0.77629298
H -3.68375897 -1.59027505 -1.41735303
H -4.00426817 -0.64642698 0.05638800
H -3.19770789 0.12744799 -1.33510995
Na 0.24837901 2.97817206 -0.35563800
H 3.34146690 1.33441901 -0.95951098
C 4.38619280 -1.22057998 -0.45374000
H 4.97129107 -0.51704901 -1.03922498
H 4.93737316 -1.47347999 0.44994399
H 4.22432899 -2.12121701 -1.04263604

```

## S45.2. Frequencies

| Mode | IR frequency  | IR intensity |
|------|---------------|--------------|
| 1    | 39.99270000   | 2.29480000   |
| 2    | 55.33510000   | 0.67800000   |
| 3    | 75.10860000   | 0.35640000   |
| 4    | 88.90970000   | 2.00800000   |
| 5    | 109.12640000  | 16.54320000  |
| 6    | 134.94730000  | 5.58420000   |
| 7    | 156.04650000  | 30.33100000  |
| 8    | 163.08350000  | 1.77750000   |
| 9    | 182.00910000  | 1.67640000   |
| 10   | 209.90550000  | 5.00650000   |
| 11   | 223.32800000  | 2.98350000   |
| 12   | 253.64660000  | 3.02240000   |
| 13   | 263.38750000  | 6.74070000   |
| 14   | 276.02890000  | 1.97710000   |
| 15   | 293.32140000  | 21.83450000  |
| 16   | 301.57360000  | 9.96640000   |
| 17   | 323.90430000  | 8.42280000   |
| 18   | 331.60420000  | 6.30770000   |
| 19   | 350.58570000  | 2.04760000   |
| 20   | 377.17950000  | 28.00830000  |
| 21   | 412.43340000  | 1.66920000   |
| 22   | 430.35720000  | 1.55360000   |
| 23   | 434.63440000  | 1.72310000   |
| 24   | 528.24450000  | 2.14670000   |
| 25   | 567.75460000  | 1.86440000   |
| 26   | 606.96460000  | 3.86900000   |
| 27   | 646.37480000  | 21.68790000  |
| 28   | 703.83280000  | 11.94290000  |
| 29   | 706.25380000  | 7.96960000   |
| 30   | 728.45930000  | 13.16780000  |
| 31   | 745.63480000  | 0.38630000   |
| 32   | 778.57970000  | 9.03670000   |
| 33   | 833.82040000  | 45.47550000  |
| 34   | 841.21160000  | 10.94900000  |
| 35   | 868.29460000  | 18.94350000  |
| 36   | 903.24010000  | 27.76450000  |
| 37   | 960.82170000  | 27.77570000  |
| 38   | 971.08290000  | 8.76620000   |
| 39   | 992.73370000  | 10.77330000  |
| 40   | 998.13580000  | 19.92460000  |
| 41   | 1049.06360000 | 10.27990000  |
| 42   | 1072.50780000 | 2.55810000   |
| 43   | 1078.73640000 | 1.10440000   |
| 44   | 1090.24740000 | 5.22180000   |

|    |               |              |
|----|---------------|--------------|
| 45 | 1139.84630000 | 3.88290000   |
| 46 | 1147.34390000 | 6.87570000   |
| 47 | 1152.08540000 | 0.07340000   |
| 48 | 1185.11270000 | 17.30400000  |
| 49 | 1215.77050000 | 28.52010000  |
| 50 | 1247.69670000 | 3.00090000   |
| 51 | 1257.76170000 | 10.59760000  |
| 52 | 1272.02110000 | 16.81910000  |
| 53 | 1293.67240000 | 0.36640000   |
| 54 | 1303.10810000 | 3.38150000   |
| 55 | 1327.88330000 | 16.12360000  |
| 56 | 1354.97150000 | 29.11330000  |
| 57 | 1378.91010000 | 33.79760000  |
| 58 | 1397.00780000 | 12.29050000  |
| 59 | 1412.92760000 | 68.38170000  |
| 60 | 1420.22270000 | 9.50260000   |
| 61 | 1435.90660000 | 10.73730000  |
| 62 | 1447.08010000 | 12.29180000  |
| 63 | 1461.84940000 | 16.43940000  |
| 64 | 1467.78190000 | 35.15740000  |
| 65 | 1478.10500000 | 12.36550000  |
| 66 | 1485.86820000 | 17.15150000  |
| 67 | 1488.87710000 | 11.71020000  |
| 68 | 1495.99830000 | 1.60350000   |
| 69 | 1506.01460000 | 5.02710000   |
| 70 | 1509.05230000 | 21.23530000  |
| 71 | 1518.45990000 | 12.45530000  |
| 72 | 1523.63770000 | 19.24400000  |
| 73 | 1542.10110000 | 47.65980000  |
| 74 | 1546.77030000 | 68.36110000  |
| 75 | 1594.16200000 | 4.52480000   |
| 76 | 1682.41730000 | 384.88370000 |
| 77 | 3056.87440000 | 21.61250000  |
| 78 | 3064.28630000 | 6.10860000   |
| 79 | 3073.67840000 | 4.14470000   |
| 80 | 3077.20070000 | 3.63350000   |
| 81 | 3082.39240000 | 22.85860000  |
| 82 | 3097.66290000 | 4.02270000   |
| 83 | 3100.36040000 | 11.41100000  |
| 84 | 3122.85140000 | 5.25640000   |
| 85 | 3147.19250000 | 2.98390000   |
| 86 | 3155.73430000 | 0.27650000   |
| 87 | 3161.08950000 | 5.80280000   |
| 88 | 3169.12810000 | 2.36890000   |
| 89 | 3179.32450000 | 5.59640000   |
| 90 | 3189.13500000 | 2.87730000   |
| 91 | 3195.58350000 | 8.32640000   |
| 92 | 3240.48020000 | 0.70530000   |
| 93 | 3257.85570000 | 2.12490000   |
